# Supplementary material for: Heterocycle Effects on the Liquid Crystallinity of Terthiophene Analogues
Source: PubMed Central journal article supplement (PMC6678929; doi:10.3390/ma12142314), 2019-07-19
Supplement: materials-12-02314-s001.pdf [file materials-12-02314-s001.pdf]

1 Supporting information

## 2 Heterocycle Effects on the Liquid Crystallinity of 3 Terthiophene Analogues

4 David F. Ester <sup>1</sup>, Declan McKearney <sup>1</sup>, Khrystyna Herasymchuk <sup>1</sup> and Vance E. Williams <sup>1,\*</sup>

5 <sup>1</sup> Department of Chemistry, Simon Fraser University, 8888 University Drive, Burnaby, BC V5A 1S6  
6 Canada; vancew@sfu.ca

### 7 1. Synthesis and Identification

8 All solvents used were reagent grade. 1-Bromooctane was purchased from TCI America.  
9 Triethylamine was purchased from Anachemia. All other reagents were purchased from Sigma-  
10 Aldrich. All reagents were used as received without further purification. Column chromatography  
11 was performed on silica gel 60 (230-400 mesh) purchased from Silicycle Inc. CDCl<sub>3</sub> was obtained from  
12 Cambridge Isotope Laboratories Inc.

13 400 MHz <sup>1</sup>H NMR spectra were run on a Bruker AMX-400 400 MHz NMR spectrometer. 500  
14 MHz <sup>1</sup>H NMR spectra were run on a Varian AS500 Unity Inova 500 MHz spectrometer. High  
15 resolution mass spectrometry was carried out on a Bruker micrOTOF II LC/MS (ESI<sup>+</sup>) by Nonka  
16 Sevova at Notre Dame Mass Spectrometry and Proteomics facility.

17 The final target compounds were prepared according to the procedures described in the  
18 experimental section of the paper. The synthetic procedures for any precursors and literature  
19 compounds are outlined below. The percent yield and detailed <sup>1</sup>H and <sup>13</sup>C NMR and mass spec data  
20 for all compounds are given below.

#### 21 1.1. Precursors and literature compounds

22 *2-Decylthiophene*: In an oven-dried 100 mL 3-neck round bottom flask, thiophene (1.0 g, 11.9  
23 mmol) in dry THF was cooled to -78 °C under a nitrogen atmosphere. n-Butyllithium (0.95 eq., 2.5 M  
24 solution in hexanes) was added drop-wise. The mixture was stirred at 0 °C for 60 minutes. Once  
25 cooled back to -78 °C, 1-bromodecane (0.90 eq.) was added slowly. The reaction was allowed to warm  
26 to room temperature and stirred overnight. It was then quenched with water, extracted with diethyl  
27 ether (3x50 mL), and the combined organic fractions were dried over magnesium sulfate. The crude  
28 was purified by vacuum distillation to give the product as a yellow oil (81 % yield). <sup>1</sup>H NMR (500  
29 MHz, Chloroform-*d*) δ 7.18 (dd, *J* = 5.1, 1.1 Hz, 1H), 7.00 (dd, *J* = 5.1, 3.4 Hz, 1H), 6.87 (d, *J* = 3.2 Hz,  
30 1H), 2.93 (t, *J* = 7.7 Hz, 2H), 1.79 (p, *J* = 7.4 Hz, 2H), 1.53 – 1.33 (m, 16H), 1.02 (t, *J* = 6.8 Hz, 3H) ppm.

31 *5-Decyl-2-thiophenecarboxylic acid*: In an oven-dried 100 mL 3-neck round bottom flask, 2-  
32 decylthiophene (1.0 g, 4.46 mmol) in dry diethyl ether was cooled to -78 °C under a nitrogen  
33 atmosphere. n-Butyllithium (1.2 eq., 2.5 M solution in hexanes) was added drop-wise. The mixture  
34 was stirred at 0 °C for 60 minutes. Once cooled back to -78 °C, carbon dioxide (excess) in the form of  
35 dry ice chunks was added. The reaction was allowed to warm to room temperature and stirred  
36 overnight. The precipitate was filtered and washed with diethyl ether then 10% hydrochloric acid  
37 and dried under high vacuum overnight to give the product as a white solid (69 % yield). <sup>1</sup>H NMR  
38 (500 MHz, Chloroform-*d*) δ 7.70 (d, *J* = 3.6 Hz, 1H), 6.80 (d, *J* = 3.5 Hz, 1H), 4.65 (s, 1H), 2.83 (t, *J* = 7.6  
39 Hz, 2H), 1.69 (p, *J* = 7.5 Hz, 2H), 1.43 – 1.18 (m, 15H), 0.88 (t, *J* = 6.8 Hz, 3H) ppm.

40 *Hydrazide derivative 1*: In an oven-dried 25 mL 3-neck round bottom flask, 5-decyl-2-  
41 thiophenecarboxylic acid (1.0 g, 3.52 mmol) was refluxed in thionyl chloride (5 mL, excess) under a  
42 nitrogen atmosphere for 2 hours. After cooling to room temperature, remaining thionyl chloride was  
43 removed via high vacuum overnight to generate 5-decyl-2-thiophenecarbonyl chloride in situ. This –  
44 oyl chloride was added to an oven-dried 50 mL 3-neck round bottom flask containing dry NMP.  
45 Triethylamine (3 mL, excess) was added followed by the drop-wise addition of hydrazine hydrate  
46 (0.7 eq.) at 0 °C. The mixture was warmed to room temperature and stirred overnight. The resulting

47 precipitate was collected by filtration. This crude product was purified by column chromatography  
48 on silica treated with 2% trimethylamine using a gradient from 0 to 50 % of ethyl acetate in hexanes  
49 as the eluent. The pure product was isolated as a white powder (37 % yield). <sup>1</sup>H NMR (500 MHz,  
50 Chloroform-*d*) δ 9.04 (s, 2H), 7.52 (d, *J* = 3.7 Hz, 2H), 6.76 (d, *J* = 3.7 Hz, 2H), 2.81 (t, *J* = 7.6 Hz, 4H),  
51 1.67 (p, *J* = 7.5 Hz, 4H), 1.26 (s, 28H), 0.88 (t, *J* = 6.9 Hz, 6H) ppm.

52 α-Terthienyl, **Th**<sub>3</sub>: Magnesium turnings (0.90 g, 37.0 mmol) were added to a 100 mL 3-neck round  
53 bottom flask, which was then sealed, purged with N<sub>2</sub>, and flame dried. Added dry diethyl ether (50  
54 mL) and cooled to 0 °C, followed by slow addition of 2-bromothiophene (3.26 mL, 33.7 mmol).  
55 Solution was warmed to room temperature and then refluxed for 2 hours to generate the Grignard  
56 solution. An oven-dried 250 mL 3-neck round bottom flask was charged with [1,3-  
57 bis(diphenylphosphino)propane] dichloronickel(II) (catalytic, ~2%) and cycled between N<sub>2</sub> and  
58 vacuum three times. Dry diethyl ether (150 mL) and then 2,5-dibromothiophene (1.71 mL, 15.3 mmol)  
59 were added and the solution was cooled to 0 °C. The Grignard solution prepared in situ was then  
60 added dropwise, the reaction was warmed to room temperature and then refluxed for 2 hours. After  
61 cooling to room temperature, the reaction was quenched by slow addition of 10% hydrochloric acid,  
62 the organic was separated out, and the aqueous was further extracted with diethyl ether (3x75 mL).  
63 The combined organic fractions were dried over magnesium sulfate. The crude was purified by  
64 column chromatography on silica using 5% ethyl acetate in hexanes as the eluent to give the final  
65 product (57 % yield). <sup>1</sup>H NMR (500 MHz, Chloroform-*d*) δ 7.23 (dd, *J* = 5.1, 1.2 Hz, 2H), 7.18 (dd, *J* =  
66 3.6, 1.2 Hz, 2H), 7.09 (s, 2H), 7.03 (dd, *J* = 5.1, 3.6 Hz, 2H) ppm.

67 **Th**<sub>3</sub>(10): A flame-dried 50 mL three-neck round bottom flask was charged with **Th**<sub>3</sub> (0.15 g, 0.60  
68 mmol) and cycled between high vacuum and N<sub>2</sub> atmosphere three times. Dry THF (25 mL) was added  
69 by cannula and the solution was cooled to around -78 °C prior to the drop-wise addition of *n*-  
70 butyllithium solution (2.5 M, 2.5 equivalents). After stirring for 30 minutes, potassium *t*-butoxide (1.0  
71 M solution, 2.5 equivalents) was added and the solution was stirred for another 30 minutes. Then 1-  
72 decylbromide (2.2 equivalents) was added drop-wise. This mixture was warmed to room  
73 temperature and stirred overnight. The reaction was quenched with water (40 mL) and extracted with  
74 hexanes (3x30 mL). The combined organic fractions were dried over magnesium sulfate. Further  
75 purification was done by column chromatography on silica using hexanes as the eluent.  
76 Recrystallization from ethanol afforded the product as a light yellow solid (49 % yield). <sup>1</sup>H NMR (500  
77 MHz, Chloroform-*d*) δ 6.96 (t, *J* = 3.3 Hz, 4H), 6.67 (d, *J* = 3.4 Hz, 2H), 2.78 (t, *J* = 7.6 Hz, 4H), 1.67 (p, *J*  
78 = 7.4 Hz, 4H), 1.42 – 1.21 (m, 28H), 0.92 – 0.84 (m, 6H) ppm. <sup>13</sup>C NMR (101 MHz, Chloroform-*d*) δ  
79 145.56, 136.29, 134.79, 124.92, 123.60, 123.31, 32.06, 31.76, 30.35, 29.76, 29.71, 29.52, 29.48, 29.24, 22.84,  
80 14.27 ppm.

81 **Th-Thd-Th core**: In a 150 mL high pressure vessel, 2-thiophenecarboxaldehyde (1.5 g, 13.4  
82 mmol), sulfur (1.5 equivalents), and hydrazine hydrate (4.0 equivalents) were combined in propanol  
83 (10 mL). The mixture was allowed to react for 4 hours at 150 °C under high pressure. Once cooled to  
84 room temperature, the precipitate was collected by vacuum filtration. The crude was then dissolved  
85 in dichloromethane (150 mL), washed with saturated sodium sulfide (2x120 mL), water (1x150 mL),  
86 and then dried over magnesium sulfate. Recrystallization from ethanol afforded the final product as  
87 a light orange solid (88 % yield). <sup>1</sup>H NMR (500 MHz, Chloroform-*d*) δ 7.56 (dd, *J* = 3.7, 1.1 Hz, 2H),  
88 7.50 (dd, *J* = 5.1, 1.1 Hz, 2H), 7.13 (dd, *J* = 5.0, 3.7 Hz, 2H) ppm. <sup>13</sup>C NMR (126 MHz, Chloroform-*d*) δ  
89 161.18, 132.35, 129.65, 129.55, 128.14 ppm.

## 90 1.2. Oxadiazole derivative

91 **Th-Oxd-Th(10)**: 64% yield. <sup>1</sup>H NMR (500 MHz, Chloroform-*d*) δ 7.60 (d, *J* = 3.7 Hz, 2H), 6.84 (dd,  
92 *J* = 3.7, 1.0 Hz, 2H), 2.87 (t, *J* = 7.6 Hz, 4H), 1.72 (p, *J* = 7.6 Hz, 4H), 1.42 – 1.23 (m, 30H), 0.88 (t, *J* = 6.9  
93 Hz, 6H) ppm. <sup>13</sup>C NMR (126 MHz, Chloroform-*d*) δ 160.25, 151.93, 129.83, 125.48, 122.39, 32.04, 31.61,  
94 30.40, 29.72, 29.67, 29.46, 29.17, 22.83, 14.27 ppm. HRMS (ESI<sup>+</sup> of *m* + H<sup>+</sup>): *m/z* calcd for C<sub>30</sub>H<sub>47</sub>N<sub>2</sub>O<sub>5</sub>:  
95 515.3085, found: 515.3124.

## 96 1.3. Thiadiazole derivatives

97 **Th-Thd-Th(4)**: 62% yield.  $^1\text{H}$  NMR (500 MHz, Chloroform-*d*)  $\delta$  7.35 (d,  $J$  = 3.7 Hz, 2H), 6.79 (dd,  
98  $J$  = 3.7, 1.0 Hz, 2H), 2.89 – 2.81 (m, 4H), 1.75 – 1.66 (m, 4H), 1.48 – 1.36 (m, 4H), 0.95 (t,  $J$  = 7.4 Hz, 6H)  
99 ppm.  $^{13}\text{C}$  NMR (126 MHz, Chloroform-*d*)  $\delta$  160.96, 150.97, 129.74, 129.53, 125.30, 33.68, 30.15,  
100 22.28, 13.96 ppm. HRMS (ESI<sup>+</sup> of  $m + \text{H}^+$ ):  $m/z$  calcd for  $\text{C}_{18}\text{H}_{23}\text{N}_2\text{S}_3$ : 363.0979, found: 363.1018.

101 **Th-Thd-Th(6)**: 29% yield.  $^1\text{H}$  NMR (500 MHz, Chloroform-*d*)  $\delta$  7.35 (d,  $J$  = 3.7 Hz, 2H), 6.79 (dd,  
102  $J$  = 3.7, 1.0 Hz, 2H), 2.85 (t,  $J$  = 7.6 Hz, 4H), 1.71 (p,  $J$  = 7.6 Hz, 4H), 1.43 – 1.29 (m, 12H), 0.92 – 0.87 (m,  
103 6H) ppm.  $^{13}\text{C}$  NMR (126 MHz, Chloroform-*d*)  $\delta$  160.97, 151.04, 129.73, 129.54, 125.29, 31.57, 30.47,  
104 28.86, 22.70, 14.24, 14.19 ppm. HRMS (ESI<sup>+</sup> of  $m + \text{H}^+$ ):  $m/z$  calcd for  $\text{C}_{22}\text{H}_{31}\text{N}_2\text{S}_3$ : 419.1605, found:  
105 419.1644.

106 **Th-Thd-Th(8)**: 30% yield.  $^1\text{H}$  NMR (500 MHz, Chloroform-*d*)  $\delta$  7.35 (d,  $J$  = 3.7 Hz, 2H), 6.79 (d,  $J$   
107 = 3.7 Hz, 2H), 2.84 (t,  $J$  = 7.6 Hz, 4H), 1.71 (p,  $J$  = 7.6 Hz, 4H), 1.43 – 1.21 (m, 20H), 0.88 (t,  $J$  = 6.9 Hz,  
108 6H) ppm.  $^{13}\text{C}$  NMR (126 MHz, Chloroform-*d*)  $\delta$  160.97, 151.03, 129.73, 129.52, 125.28, 31.98, 31.61,  
109 30.46, 29.37, 29.20, 22.80, 14.27, 14.23 ppm. HRMS (ESI<sup>+</sup> of  $m + \text{H}^+$ ):  $m/z$  calcd for  $\text{C}_{26}\text{H}_{39}\text{N}_2\text{S}_3$ : 475.2231,  
110 found: 475.2270.

111 **Th-Thd-Th(10)**: 51% yield.  $^1\text{H}$  NMR (500 MHz, Chloroform-*d*)  $\delta$  7.35 (d,  $J$  = 3.7 Hz, 2H), 6.79 (d,  
112  $J$  = 3.7 Hz, 2H), 2.84 (t,  $J$  = 7.6 Hz, 4H), 1.71 (p,  $J$  = 7.5 Hz, 4H), 1.43 – 1.22 (m, 28H), 0.88 (t,  $J$  = 6.9 Hz,  
113 6H) ppm.  $^{13}\text{C}$  NMR (126 MHz, Chloroform-*d*)  $\delta$  160.97, 151.04, 129.74, 129.52, 125.29, 32.05, 31.61,  
114 30.48, 29.73, 29.68, 29.47, 29.20, 22.84, 14.27 ppm. HRMS (ESI<sup>+</sup> of  $m + \text{H}^+$ ):  $m/z$  calcd for  $\text{C}_{30}\text{H}_{47}\text{N}_2\text{S}_3$ :  
115 531.2857, found: 531.2896.

116 **Th-Thd-Th(12)**: 69% yield.  $^1\text{H}$  NMR (500 MHz, Chloroform-*d*)  $\delta$  7.35 (d,  $J$  = 3.6 Hz, 2H), 6.79 (d,  
117  $J$  = 3.7 Hz, 2H), 2.84 (t,  $J$  = 7.6 Hz, 4H), 1.71 (p,  $J$  = 7.6 Hz, 4H), 1.41 – 1.22 (m, 36H), 0.88 (t,  $J$  = 6.9 Hz,  
118 6H) ppm.  $^{13}\text{C}$  NMR (126 MHz, Chloroform-*d*)  $\delta$  160.96, 151.03, 129.74, 129.51, 125.29, 32.07, 31.61,  
119 30.47, 29.78, 29.68, 29.50, 29.46, 29.48, 29.19, 22.85, 14.27 ppm. HRMS (ESI<sup>+</sup> of  $m + \text{H}^+$ ):  $m/z$  calcd for  
120  $\text{C}_{34}\text{H}_{55}\text{N}_2\text{S}_3$ : 587.3483, found: 587.3522.

## 121 2. Polarized Optical Microscopy (POM)

122 Polarized optical microscopy was carried out using an Olympus BX50 microscope equipped  
123 with a Linkam LTS350 heating stage. All images shown are of a size of ca. 920 x 1400  $\mu\text{m}$ .

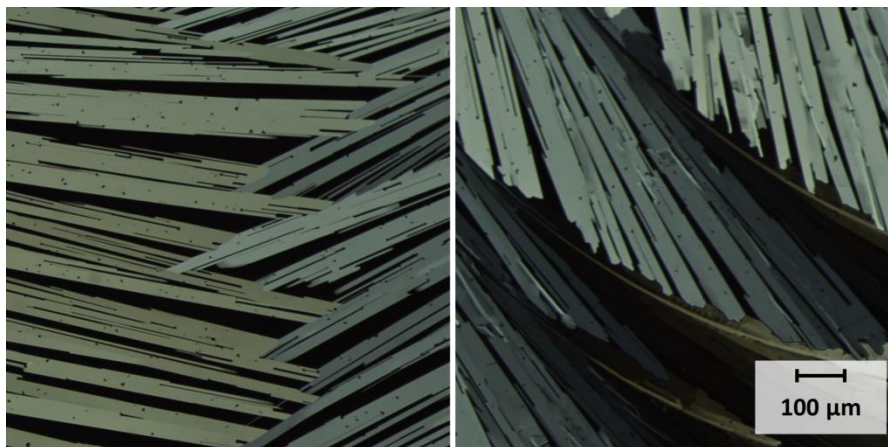

124

125

**Figure S1.** POM of Th-Oxd-Th(10) showing needle-like textures of the crystalline state at 72.0 °C.



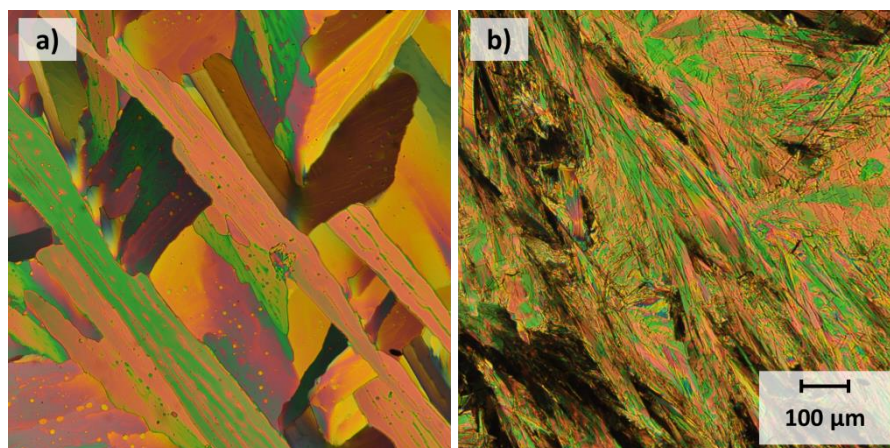

126

127

128

**Figure S2.** POM of Th-Thd-Th(4) showing needle-like textures of the crystalline state at 94.0 °C (a) and at 25.0 °C (b).

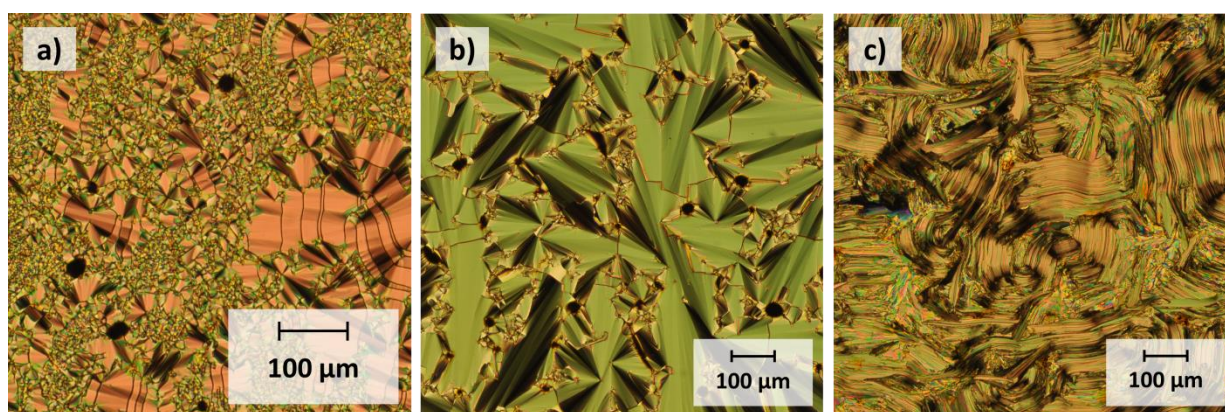

129

130

131

**Figure S3.** POM of Th-Thd-Th(6) showing schlieren and focal-conic textures of the SmC phase at 111.0 °C (a and b) and striations across focal-conic textures of the CrJ phase at 25.0 °C (c).



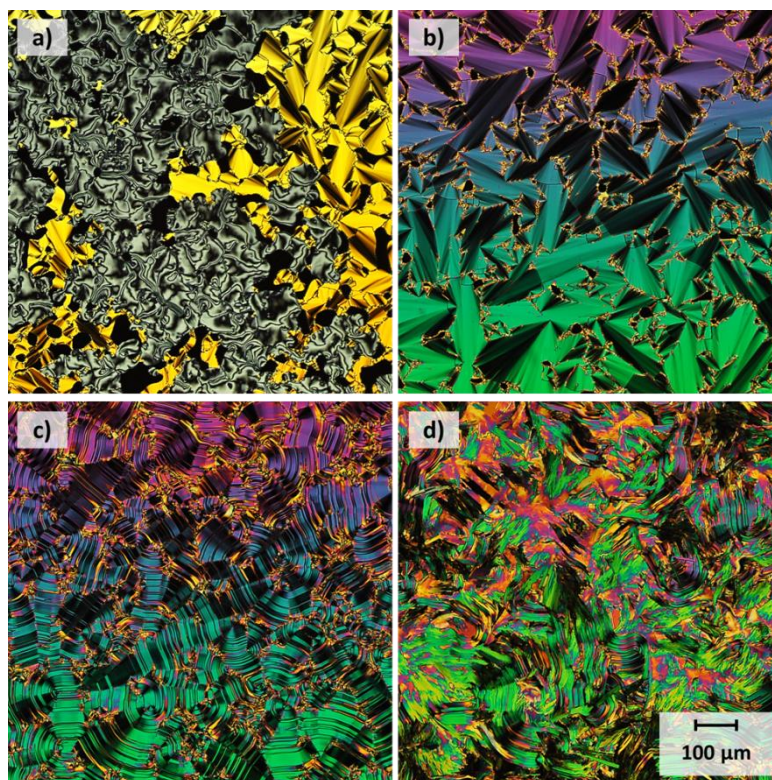

132

133

134

135

**Figure S4.** POM of Th-Thd-Th(8) showing schlieren and focal-conic textures of the SmC phase at 125.0 °C (a and b), striations across focal-conic textures of the CrJ phase at 88.0 °C (c), and changes upon cooling to the crystalline phase at 74.0 °C (d).

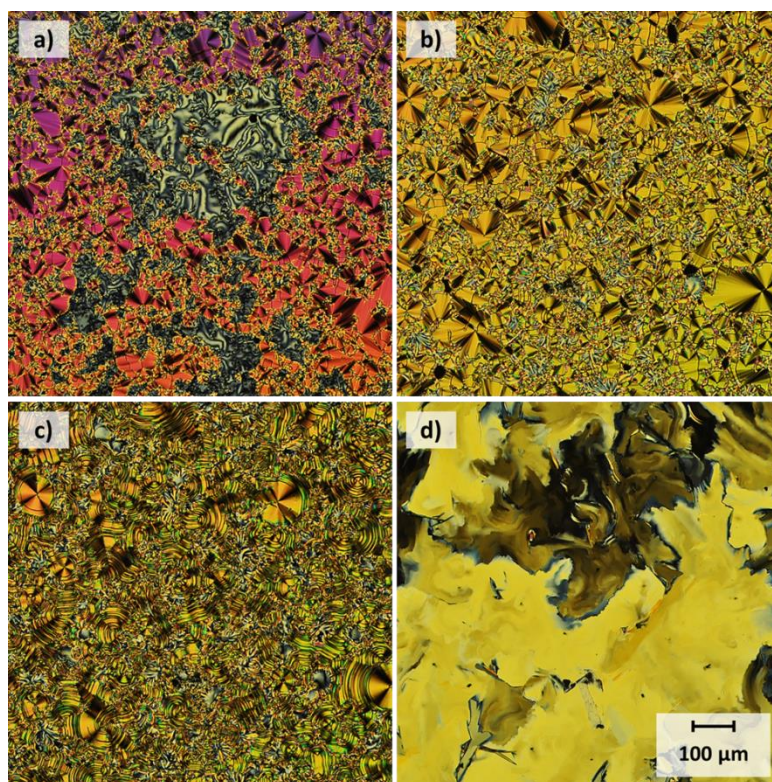

136

137

138

139

**Figure S5.** POM of Th-Thd-Th(12) showing schlieren and focal-conic textures of the SmC phase at 131.0 °C (a and b respectively), striations across focal-conic textures of the CrJ phase at 96.0 °C (c), and changes upon cooling to the crystalline phase at 87.0 °C (d).

140 **3. Variable Temperature Powder X-ray Diffraction (VT-XRD)**

141 X-ray scattering experiments were conducted using a Rigaku R-Axis Rapid diffractometer  
 142 equipped with an in-house built temperature controller. [1]

143 **Table 1.** XRD parameters of the phases of **Th<sub>3</sub>(10)** and **Th-Thd-Th(n)** (n = 6,8,10,12).

| Compound (molecular length <sup>a</sup> , nm) | Temperature (°C) | Phase | Layer spacing <sup>b</sup> (nm) | Correlation length <sup>c</sup> (nm) | # of layers | Tilt angle, $\theta$ (°) <sup>d</sup> |
|-----------------------------------------------|------------------|-------|---------------------------------|--------------------------------------|-------------|---------------------------------------|
| <b>Th<sub>3</sub>(10)</b><br>(3.91)           | 91               | SmF   | 3.60                            | 26                                   | 7           | 23                                    |
|                                               | 25               | Cr    | 3.85                            | 27                                   | 8           | 10                                    |
| <b>Th-Thd-Th(6)</b><br>(2.95)                 | 110              | SmC   | 2.26                            | 31                                   | 13          | 40                                    |
|                                               | 76               | CrJ   | 2.28                            | 36                                   | 16          | 39                                    |
|                                               | 25               | CrJ   | 2.17                            | 38                                   | 17          | 43                                    |
| <b>Th-Thd-Th(8)</b><br>(3.47)                 | 124              | SmC   | 2.65                            | 25                                   | 9           | 40                                    |
|                                               | 83               | CrJ   | 2.93                            | 31                                   | 11          | 32                                    |
|                                               | 25               | Cr    | 2.49                            | 38                                   | 15          | 44                                    |
| <b>Th-Thd-Th(10)</b><br>(4.00)                | 126              | SmC   | 3.01                            | 31                                   | 10          | 41                                    |
|                                               | 88               | CrJ   | 3.33                            | 32                                   | 10          | 34                                    |
|                                               | 25               | Cr    | 3.10                            | 34                                   | 11          | 39                                    |
| <b>Th-Thd-Th(12)</b><br>(4.49)                | 127              | SmC   | 3.38                            | 29                                   | 9           | 41                                    |
|                                               | 101              | SmI   | 3.66                            | 29                                   | 8           | 35                                    |
|                                               | 95               | CrJ   | 3.69                            | 25                                   | 7           | 35                                    |
|                                               | 25               | Cr    | 3.38                            | 29                                   | 9           | 41                                    |

144 <sup>a</sup>calculated by DFT using B3LYP/6-31G\*; <sup>b</sup>determined based on  $d_{001}$  peak; <sup>c</sup>calculated using Debye-Scherrer  
 145 equation applied to  $d_{001}$  peak; <sup>d</sup>calculated from molecular length and layer spacing

146 **Table S2.** XRD data of **Th<sub>3</sub>(10)** and **Th-Thd-Th(n)** (n=6,8,10,12).

| Compound (molecular length <sup>a</sup> , Å) | Temperature (°C) | Phase | d-spacings (Å) | Miller indices (hkl) |
|----------------------------------------------|------------------|-------|----------------|----------------------|
| <b>Th<sub>3</sub>(10)</b><br>(39.1)          | 91               | SmF   | 36.0           | 001                  |
|                                              |                  |       | 4.37           | 110                  |
|                                              |                  |       | 38.5           | 001                  |
|                                              | 25               | Cr    | 23.3           | ---                  |
|                                              |                  |       | 19.6           | 002                  |
|                                              |                  |       | 4.37           | 110                  |
|                                              |                  |       | 3.78           | ---                  |
|                                              | 110              | SmC   | 3.06           | ---                  |
|                                              |                  |       | 22.7           | 001                  |
|                                              |                  |       | 4.37           | alkyl halo           |
| <b>Th-Thd-Th(6)</b> (29.5)                   | 76               | CrJ   | 22.7           | 001                  |
|                                              |                  |       | 11.4           | 002                  |
|                                              |                  |       | 9.08           | ---                  |

|  |     |      |      |            |
|--|-----|------|------|------------|
|  |     |      | 7.22 | 003        |
|  |     |      | 6.65 | ---        |
|  |     |      | 6.24 | ---        |
|  |     |      | 5.55 | 004        |
|  |     |      | 4.82 | ---        |
|  |     |      | 4.43 | 110        |
|  |     |      | 3.62 | ---        |
|  |     |      | 3.54 | ---        |
|  |     |      | 3.27 | ---        |
|  |     |      | 3.20 | ---        |
|  |     |      | 21.7 | 001        |
|  |     |      | 10.9 | 002        |
|  |     |      | 7.12 | 003        |
|  |     |      | 6.45 | ---        |
|  |     |      | 5.78 | ---        |
|  | 25  | CrJ' | 4.78 | ---        |
|  |     |      | 4.34 | 110        |
|  |     |      | 4.03 | ---        |
|  |     |      | 3.55 | ---        |
|  |     |      | 3.16 | ---        |
|  |     |      | 3.02 | ---        |
|  | 124 | SmC  | 26.5 | 001        |
|  |     |      | 4.37 | alkyl halo |
|  |     |      | 29.3 | 001        |
|  |     |      | 14.7 | 002        |
|  |     |      | 9.83 | 003        |
|  |     |      | 7.06 | 004        |
|  |     |      | 6.73 | ---        |
|  |     |      | 5.18 | ---        |
|  | 83  | CrJ  | 4.87 | ---        |
|  |     |      | 4.45 | 110        |
|  |     |      | 4.29 | ---        |
|  |     |      | 4.11 | ---        |
|  |     |      | 3.81 | ---        |
|  |     |      | 3.58 | ---        |
|  |     |      | 3.30 | ---        |
|  |     |      | 24.9 | 001        |
|  |     |      | 12.5 | 002        |
|  |     |      | 8.79 | 003        |
|  | 25  | Cr   | 5.78 | ---        |
|  |     |      | 4.75 | ---        |
|  |     |      | 4.32 | 110        |
|  |     |      | 4.15 | ---        |

Th-Thd-Th(8) (34.7)

|  |     |     |      |            |
|--|-----|-----|------|------------|
|  |     |     | 3.54 | ---        |
|  |     |     | 3.29 | ---        |
|  |     |     | 3.14 | ---        |
|  |     |     | 30.1 | 001        |
|  | 126 | SmC | 15.1 | 002        |
|  |     |     | 4.37 | alkyl halo |
|  |     |     | 33.3 | 001        |
|  |     |     | 16.7 | 002        |
|  |     |     | 11.1 | 003        |
|  |     |     | 9.94 | ---        |
|  |     |     | 8.84 | ---        |
|  | 88  | CrJ | 7.59 | ---        |
|  |     |     | 5.16 | ---        |
|  |     |     | 4.29 | 110        |
|  |     |     | 4.27 | ---        |
|  |     |     | 4.07 | ---        |
|  |     |     | 3.98 | ---        |
|  |     |     | 3.80 | ---        |
|  |     |     | 31.0 | 001        |
|  |     |     | 15.4 | 002        |
|  |     |     | 9.78 | 003        |
|  |     |     | 7.25 | ---        |
|  |     |     | 6.36 | ---        |
|  |     |     | 5.04 | ---        |
|  | 25  | Cr  | 4.31 | ---        |
|  |     |     | 4.22 | 110        |
|  |     |     | 4.11 | ---        |
|  |     |     | 3.94 | ---        |
|  |     |     | 3.79 | ---        |
|  |     |     | 3.65 | ---        |
|  |     |     | 3.54 | ---        |
|  |     |     | 33.8 | 001        |
|  | 127 | SmC | 17.1 | 002        |
|  |     |     | 4.37 | alkyl halo |
|  |     |     | 36.6 | 001        |
|  | 101 | SmI | 18.5 | 002        |
|  |     |     | 4.37 | 110        |
|  |     |     | 36.9 | 001        |
|  |     |     | 18.8 | 002        |
|  | 95  | CrJ | 12.4 | 003        |
|  |     |     | 9.98 | ---        |
|  |     |     | 8.95 | 004        |



|    |      |      |     |
|----|------|------|-----|
|    | 5.13 | ---  |     |
|    | 4.52 | ---  |     |
|    | 4.33 | 110  |     |
|    | 4.24 | ---  |     |
|    | 4.02 | ---  |     |
|    | 3.88 | ---  |     |
|    | 3.74 | ---  |     |
|    | 3.52 | ---  |     |
|    | 33.8 | 001  |     |
|    | 17.1 | 002  |     |
|    | 11.8 | 003  |     |
|    | 9.83 | ---  |     |
|    | 8.61 | 004  |     |
|    | 7.65 | ---  |     |
| 25 | Cr   | 5.07 | --- |
|    |      | 4.26 | 110 |
|    |      | 4.17 | --- |
|    |      | 3.80 | --- |
|    |      | 3.67 | --- |
|    |      | 3.55 | --- |
|    |      | 3.44 | --- |

147 <sup>a</sup>calculated by DFT using B3LYP/6-31G\*

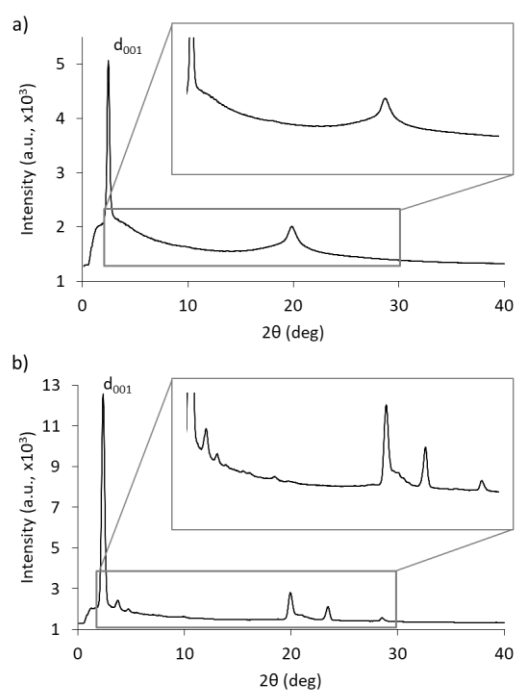

148

149

**Figure S6.** XRD of  $\text{Th}_3(10)$  at 91 °C, in the SmF phase (a) and at 25 °C, in the crystalline phase (b).

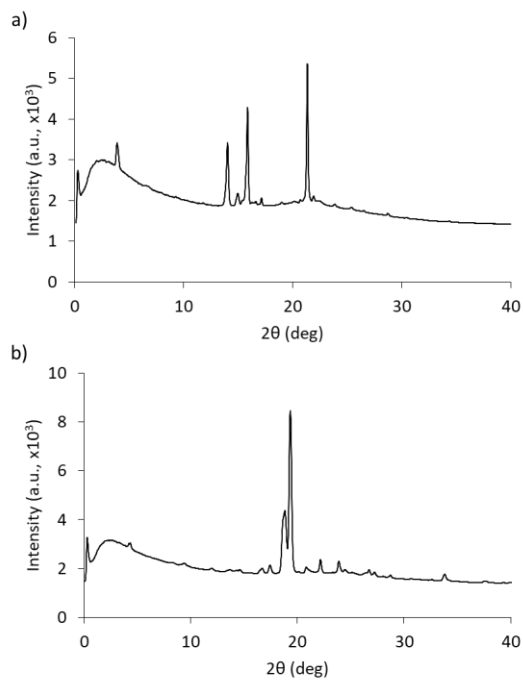

150

151 **Figure S7.** XRD of Th-Oxd-Th(10) at 70 °C, in the Cr phase (a) and at 25 °C, in the Cr'' phase (b).

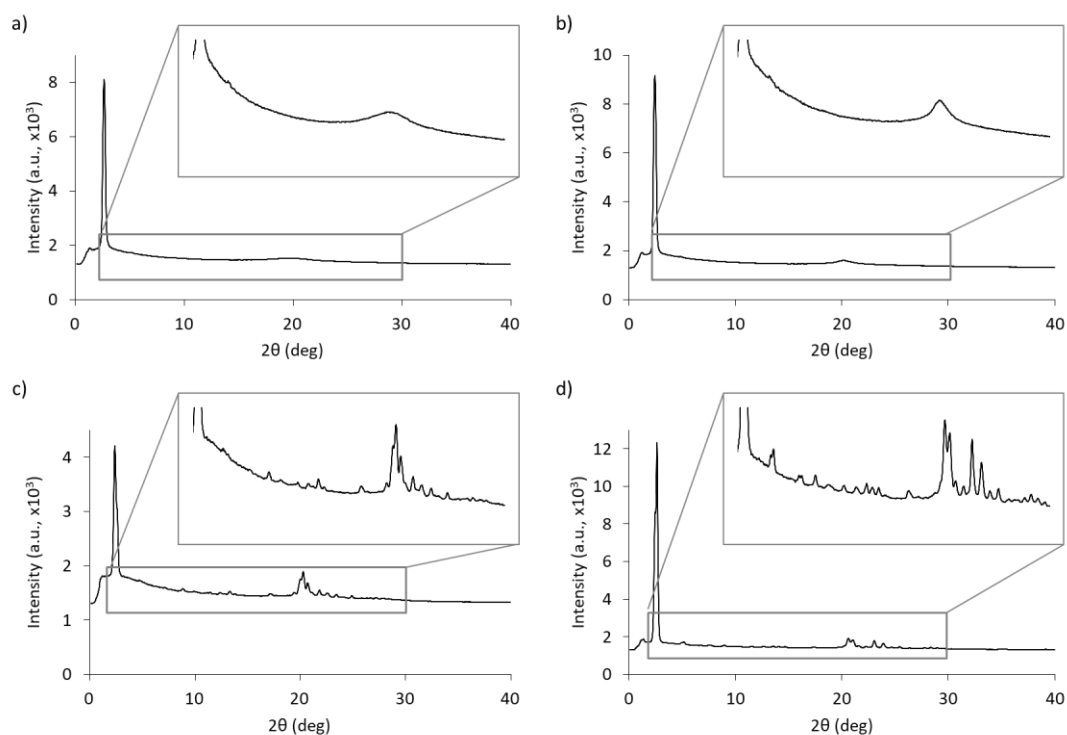

152

153 **Figure S8.** XRD of Th-Thd-Th(12) at 127 °C, in the SmC phase (a); at 101 °C, in the SmI phase (b); at  
154 95 °C, in the CrI phase (c); and at 25 °C, in the crystalline phase (d).

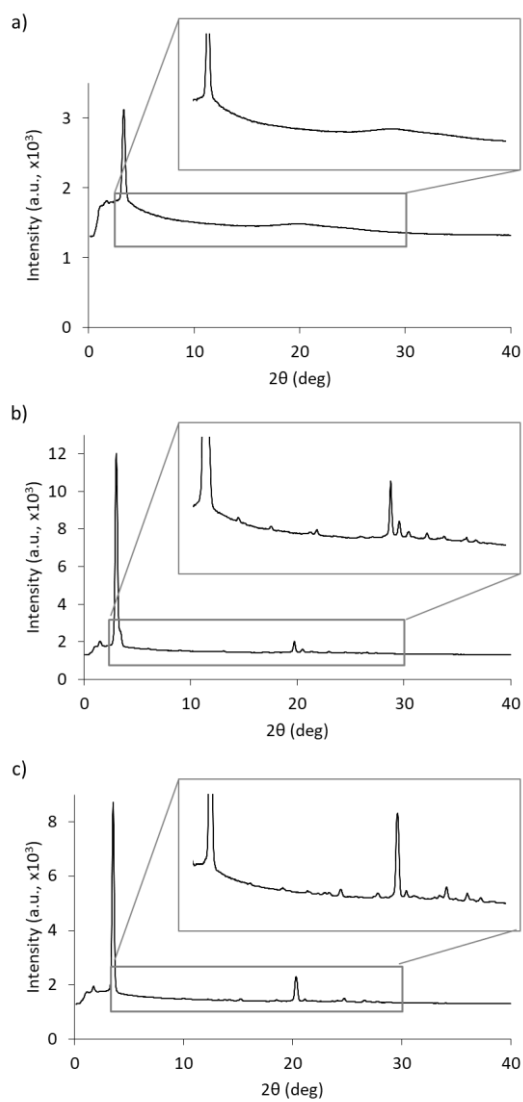

155

156

157

**Figure S9.** XRD of Th-Thd-Th(8) at 124 °C, in the SmC phase (a); at 83 °C, in the CrI phase (b); and at 25 °C, in the crystalline phase (c).

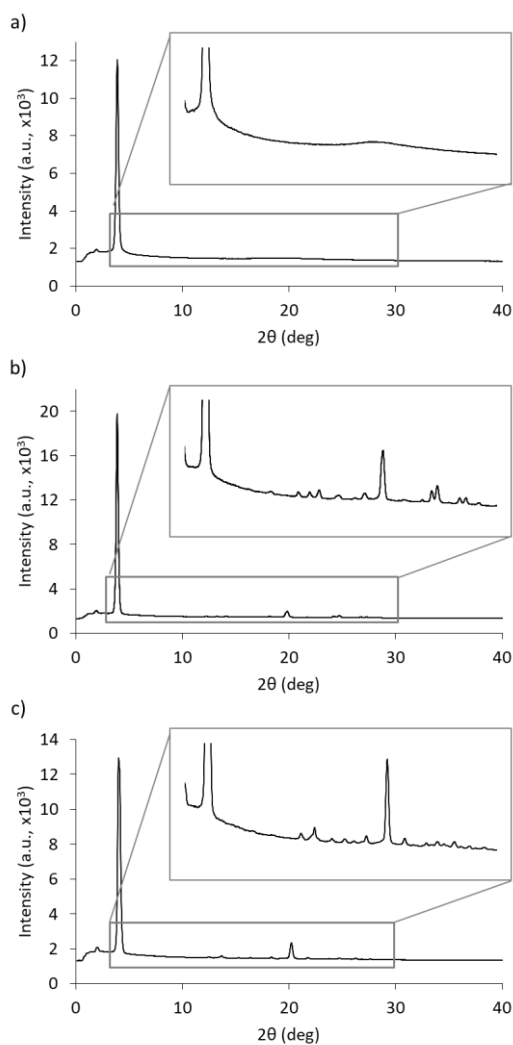

158

159

160

**Figure S10.** XRD of Th-Thd-Th(6) at 110 °C, in the SmC phase (a); at 76 °C, in the CrI phase (b); and at 25 °C, in the crystalline phase (c).

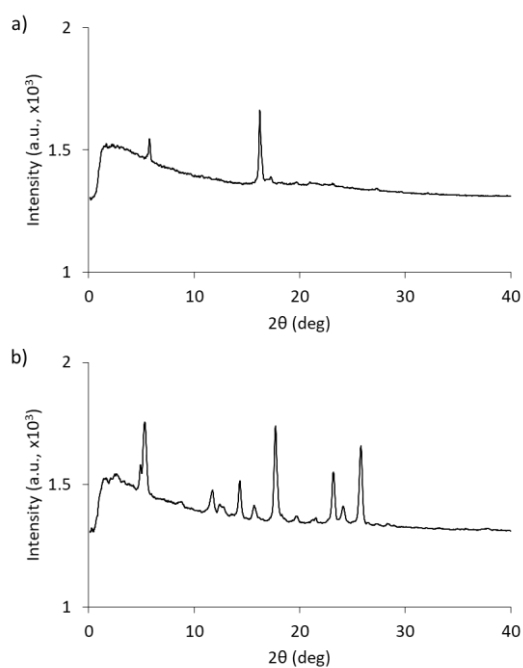

161



162 **Figure S11.** XRD of Th-Thd-Th(4) at 94 °C, in the Cr phase (a) and at 25 °C, in the Cr'' phase (b).

#### 163 4. Differential Scanning Calorimetry (DSC)

164 Phase transition temperatures and enthalpies were determined using differential scanning  
 165 calorimetry (DSC) on a TA Instruments DSC Q2000 equipped with a TA Instruments Refrigerated  
 166 Cooling System 90, heating and cooling at a rate of 10 °C min<sup>-1</sup>.

167 **Table S3.** Phase transition temperatures and enthalpies of Th<sub>3</sub>(n) reported by Boucher et al. [2].

| n  | Transition Temperature/ °C [enthalpy/ kJ mol <sup>-1</sup> ] |
|----|--------------------------------------------------------------|
| 5  | Cr 46 [15.2] CrG 76 [13.6] I                                 |
| 6  | Cr 51 [16.7] CrG 81 [16.4] I                                 |
| 7  | Cr 52 [17.8] CrG 75 [3.8] SmF 82 [0.7] SmC 86 [7] I          |
| 8  | Cr 64 [24.4] CrG 71 [3.3] SmF 85 [1.6] SmC 90 [7.3] I        |
| 9  | Cr 66 [30.8] SmF 91 [1.8] SmC 94 [10.4] I                    |
| 10 | Cr1 43 [2.3] Cr2 71 [32.1] SmF 92 [2.7] SmC 95 [10.5] I      |

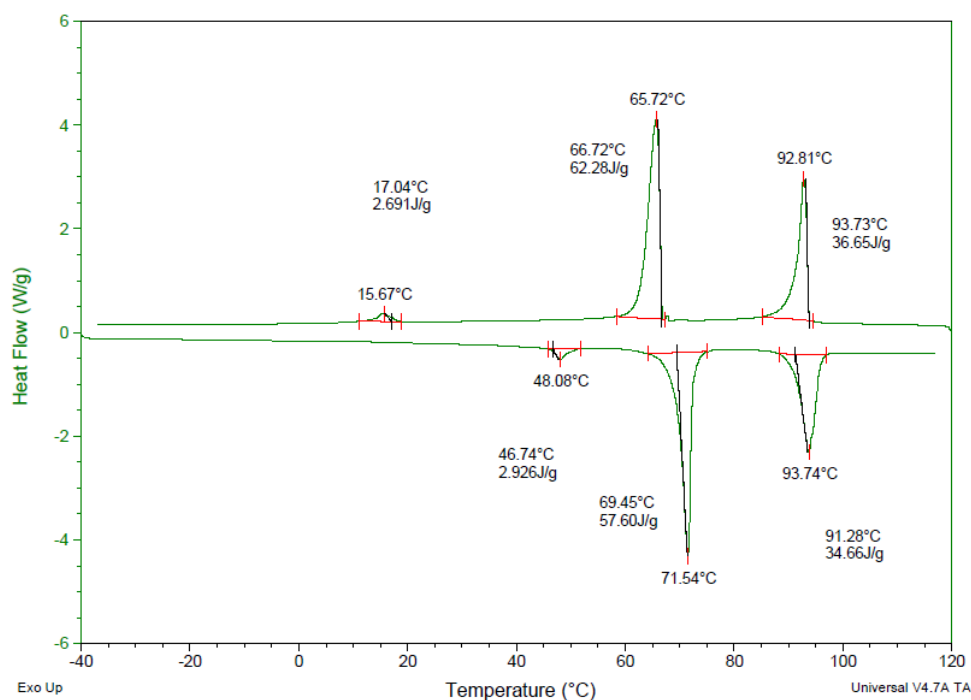

(a)

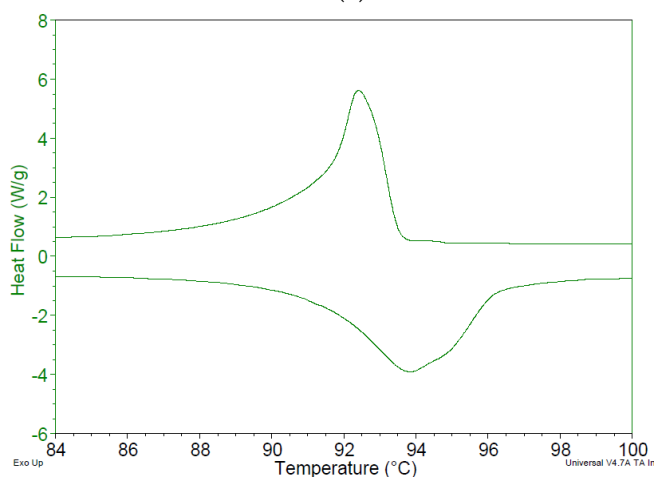

168

(b)  
**Figure S12.** DSC thermogram of Th<sub>3</sub>(10) (a), including zoomed in high temperature peak (b).

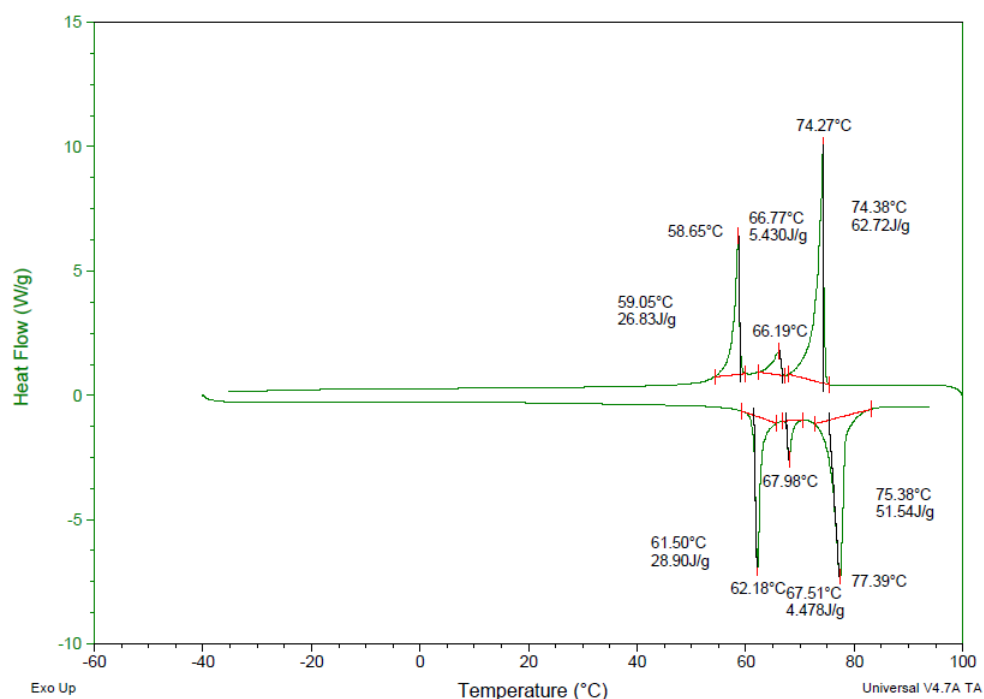

169

170

**Figure S13.** DSC thermogram of Th-Oxd-Th(10).

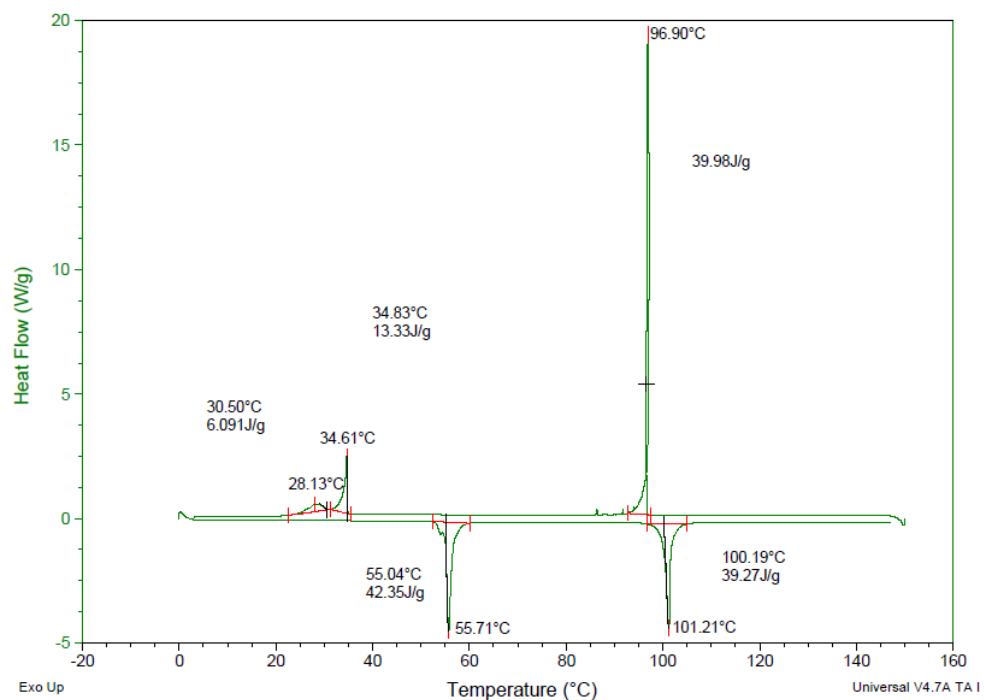

171

172

**Figure S14.** DSC thermogram of Th-Thd-Th(4).

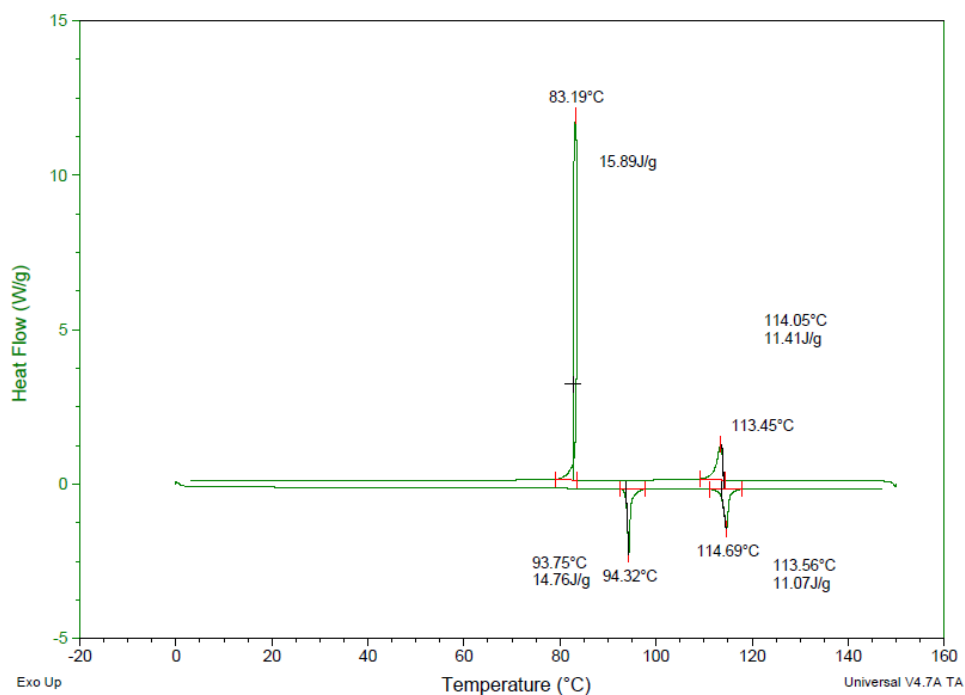

173

174

Figure S15. DSC thermogram of Th-Thd-Th(6).

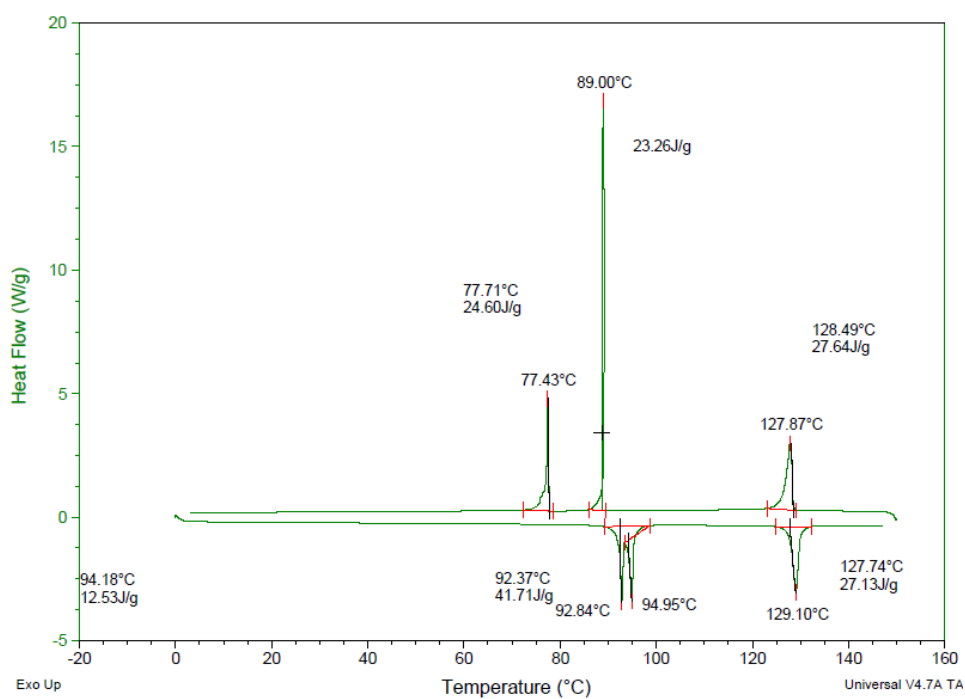

175

176

Figure S16. DSC thermogram of Th-Thd-Th(8).

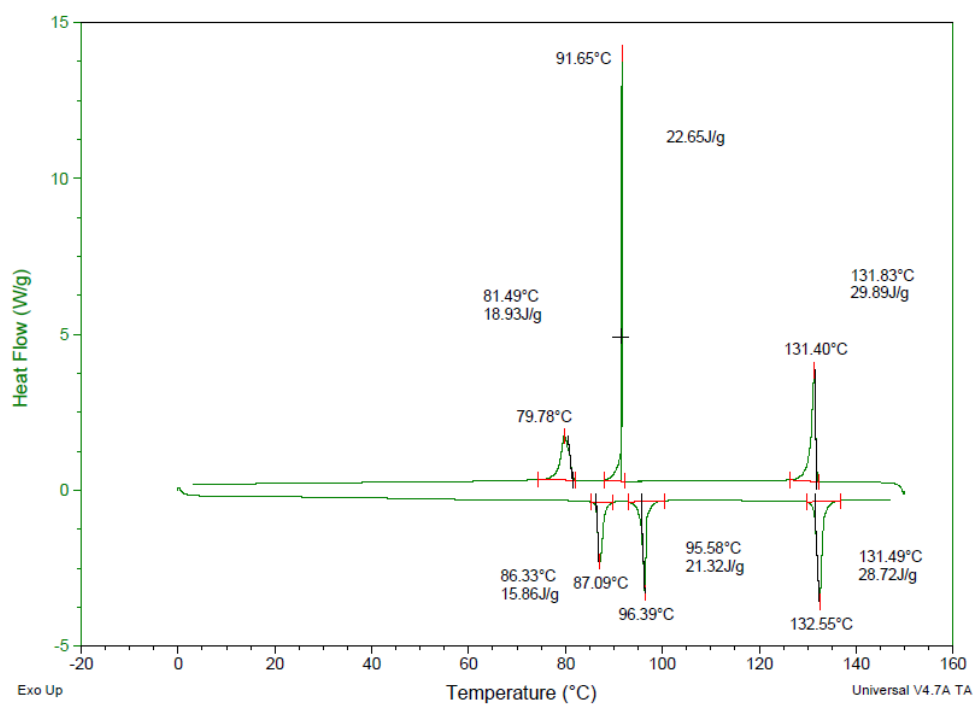

177

178

Figure S17. DSC thermogram of Th-Thd-Th(10).

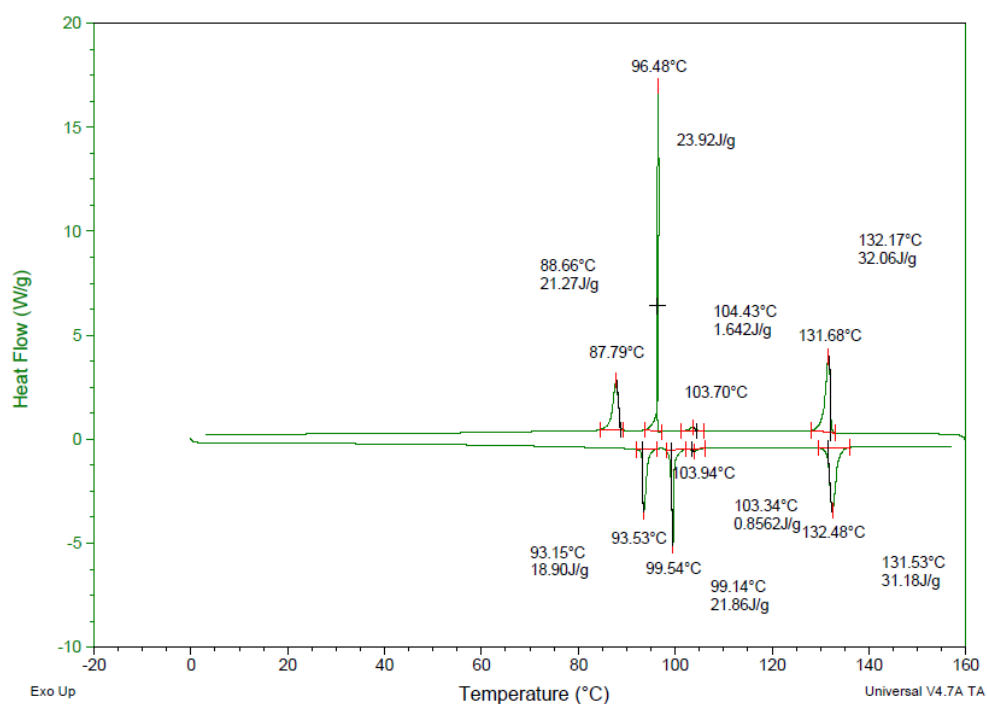

179

180

Figure S18. DSC thermogram of Th-Thd-Th(12).

## 181 5. Thermogravimetric Analysis (TGA)

182 Thermogravimetric analysis was carried out on a Shimadzu TGA-50 with a heating rate of 2 °C  
 183 per minute.

184 TGA of Th-Oxd-Th(10):



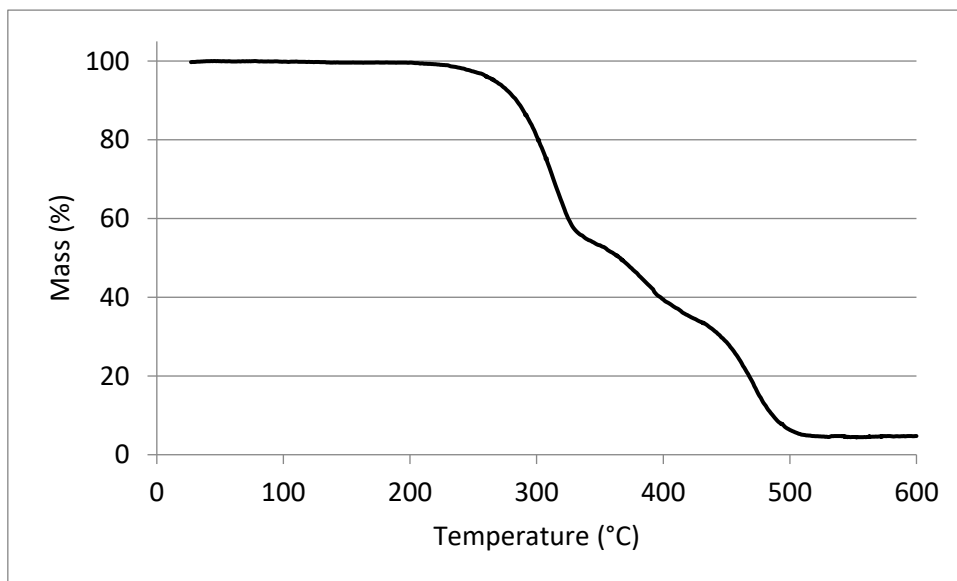

185  
186

TGA of Th-Thd-Th(4):

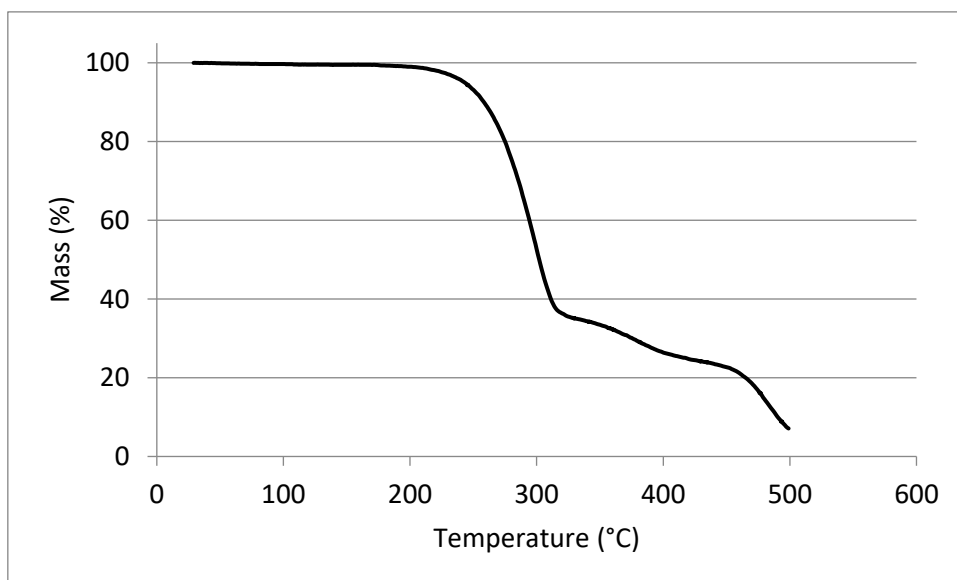

187  
188

TGA of Th-Thd-Th(6):

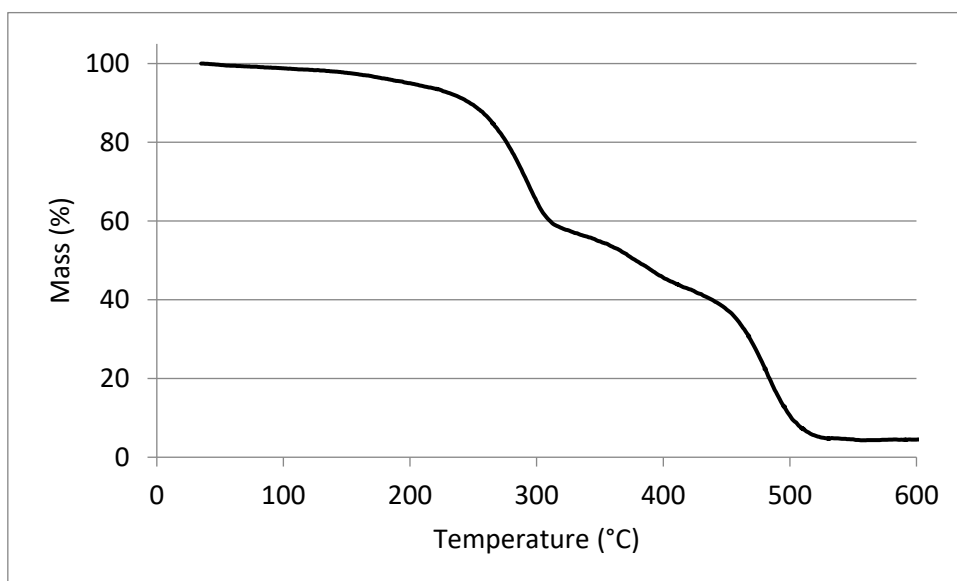

189

190 TGA of Th-Thd-Th(8):

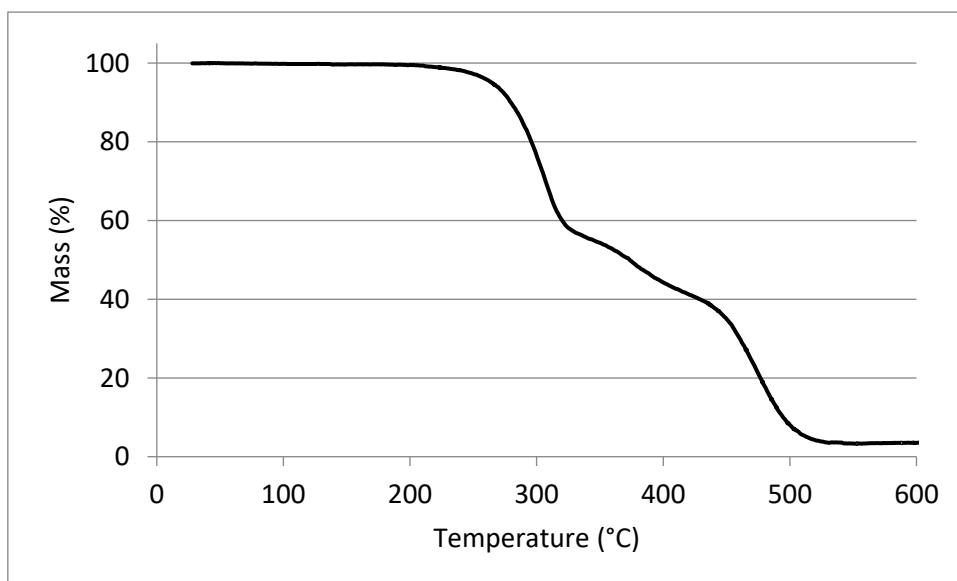

191

192 TGA of Th-Thd-Th(10):

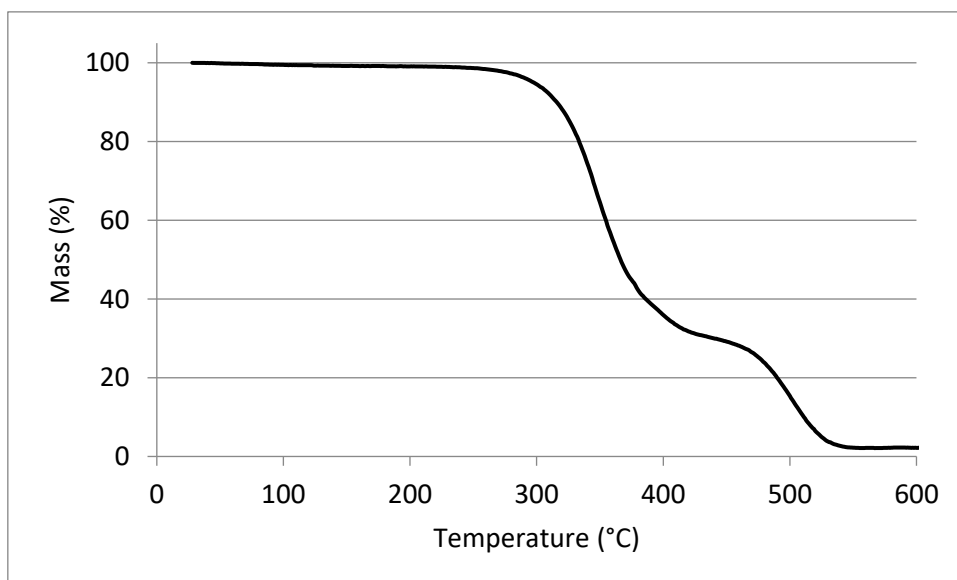

193

194 TGA of Th-Thd-Th(12):

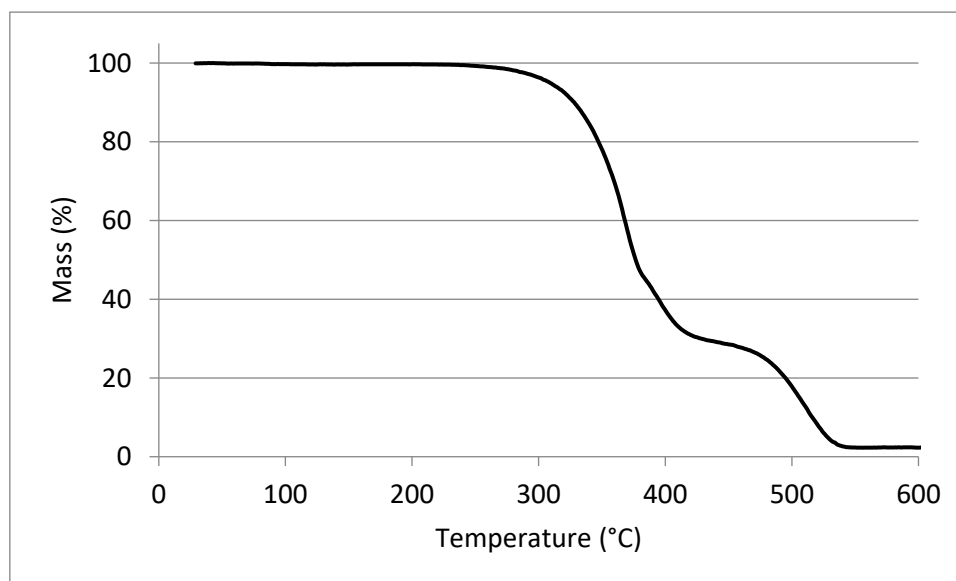

195

## 196 6. Single Crystal X-ray Diffraction

197 Suitable crystals (**Th-Thd-Th**, **Th-Thd-Th(4)** and **Th-Thd-Th(10)**) were coated in paratone oil,  
 198 mounted on a MiTeGen Micro Mount, and transferred to the the X-ray diffractometer. Data was  
 199 collected on a Bruker Smart instrument equipped with an APEX II CCD area detector fixed at a  
 200 distance of 5.0 cm (**Th-Thd-Th**, **Th-Thd-Th(4)**) or 4.0 cm (**Th-Thd-Th(10)**), from the crystal and a Cu  
 201  $K\alpha$  fine focus sealed tube ( $\lambda = 1.54178 \text{ \AA}$ ) operated at 1.5 kW (45 kV, 0.65 mA), filtered with a graphite  
 202 monochromator. Data was collected at 150K (**Th-Thd-Th(4)**, **Th-Thd-Th(10)**) or 296K (**Th-Thd-Th**);  
 203 the temperature was regulated using an Oxford Cryosystems Cryostream. Additional  
 204 crystallographic information can be found in Table S4. All diffraction data were processed using the  
 205 Bruker SAINT software package and were corrected for absorption effects using the multi-scan  
 206 technique (SADABS [3] or TWINABS [4]). The structures were solved with direct methods (SIR92)  
 207 and subsequent refinements were performed using SHELXL [5] and ShelXle. [6] Hydrogen atoms on  
 208 carbon atoms were included at geometrically idealized positions (C–H bond distance 0.95Å) and  
 209 were not refined. The isotropic thermal parameters of the hydrogen atoms were fixed at 1.2 times  
 210 that of the preceding carbon atom. Diagrams were prepared using ORTEP-3 [7] and POV-RAY. [8]  
 211 Thermal ellipsoids are shown at the 50% probability level.

212

**Table S4.** Crystallographic information table for **Th-Thd-Th**, **Th-Thd-Th(4)**, and **Th-Thd-Th(10)**.

| Compound                         | <b>Th-Thd-Th</b>  | <b>Th-Thd-Th(4)</b>  | <b>Th-Thd-Th(10)</b> |
|----------------------------------|-------------------|----------------------|----------------------|
| Chemical Formula                 | $C_{10}H_6N_2S_3$ | $C_{18}H_{22}N_2S_3$ | $C_{30}H_{46}N_2S_3$ |
| Formula Mass                     | 250.35            | 362.55               | 530.87               |
| $a/\text{\AA}$                   | 6.34810(10)       | 7.3146(4)            | 7.5511(11)           |
| $b/\text{\AA}$                   | 9.63630(10)       | 7.6299(3)            | 9.6532(16)           |
| $c/\text{\AA}$                   | 17.8284(2)        | 18.0456(9)           | 23.523(4)            |
| $\alpha/^\circ$                  | 90                | 85.306(4)            | 91.278(8)            |
| $\beta/^\circ$                   | 94.9750(10)       | 84.800(4)            | 94.604(7)            |
| $\gamma/^\circ$                  | 90                | 67.452(4)            | 100.468(9)           |
| Unit cell volume/ $\text{\AA}^3$ | 1086.49(2)        | 925.09(8)            | 1679.5(5)            |
| Temperature/K                    | 159(2)            | 150(2)               | 150(2)               |
| Space group                      | P21/c             | P-1                  | P-1                  |

|                                              |               |               |               |
|----------------------------------------------|---------------|---------------|---------------|
| Number of formula unit per cell/Z            | 4             | 2             | 2             |
| Radiation type                               | Cu K $\alpha$ | Cu K $\alpha$ | Cu K $\alpha$ |
| Absorption coefficient, $\mu/\text{mm}^{-1}$ | 5.949         | 3.651         | 2.142         |
| No. of reflections collected                 | 5857          | 9288          | 17667         |
| No. unique reflections                       | 1922          | 3161          | 5526          |
| $R_{\text{int}}$                             | 0.0288        | 0.0693        | 0.0630        |
| Final $R_1$ values ( $I > 2\sigma(I)$ )      | 0.0449        | 0.0867        | 0.2077        |
| Final $wR(F^2)$ values ( $I > 2\sigma(I)$ )  | 0.1299        | 0.2800        | 0.5868        |
| Final $R_1$ values (all data)                | 0.0475        | 0.1088        | 0.2178        |
| Final $wR(F^2)$ (all data)                   | 0.1331        | 0.2965        | 0.6060        |
| Goodness of fit                              | 1.080         | 1.161         | 3.232         |

213 All crystal structure figures below follow the legend: sulphur in yellow, nitrogen in light blue,  
214 carbon in grey, hydrogen in white.

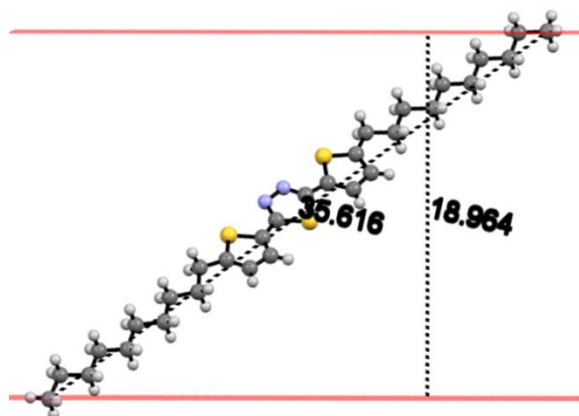

215

216 **Figure S19.** Estimation of the tilt angle in the room temperature smectic phase of **Th-Thd-Th(10)**  
217 based on the single crystal structure.

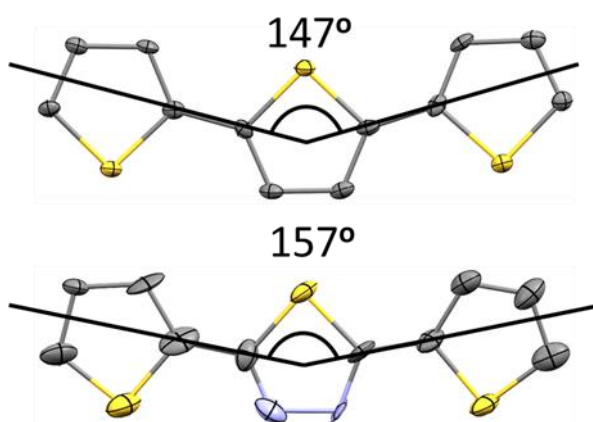

218

219 **Figure S20.** Bond angles at the 2 and 5 positions of the central heterocycle for **Th<sub>3</sub>(8)[9]** and **Th-Thd-**  
220 **Th(10)**. Alkyl chains and hydrogens omitted for clarity.



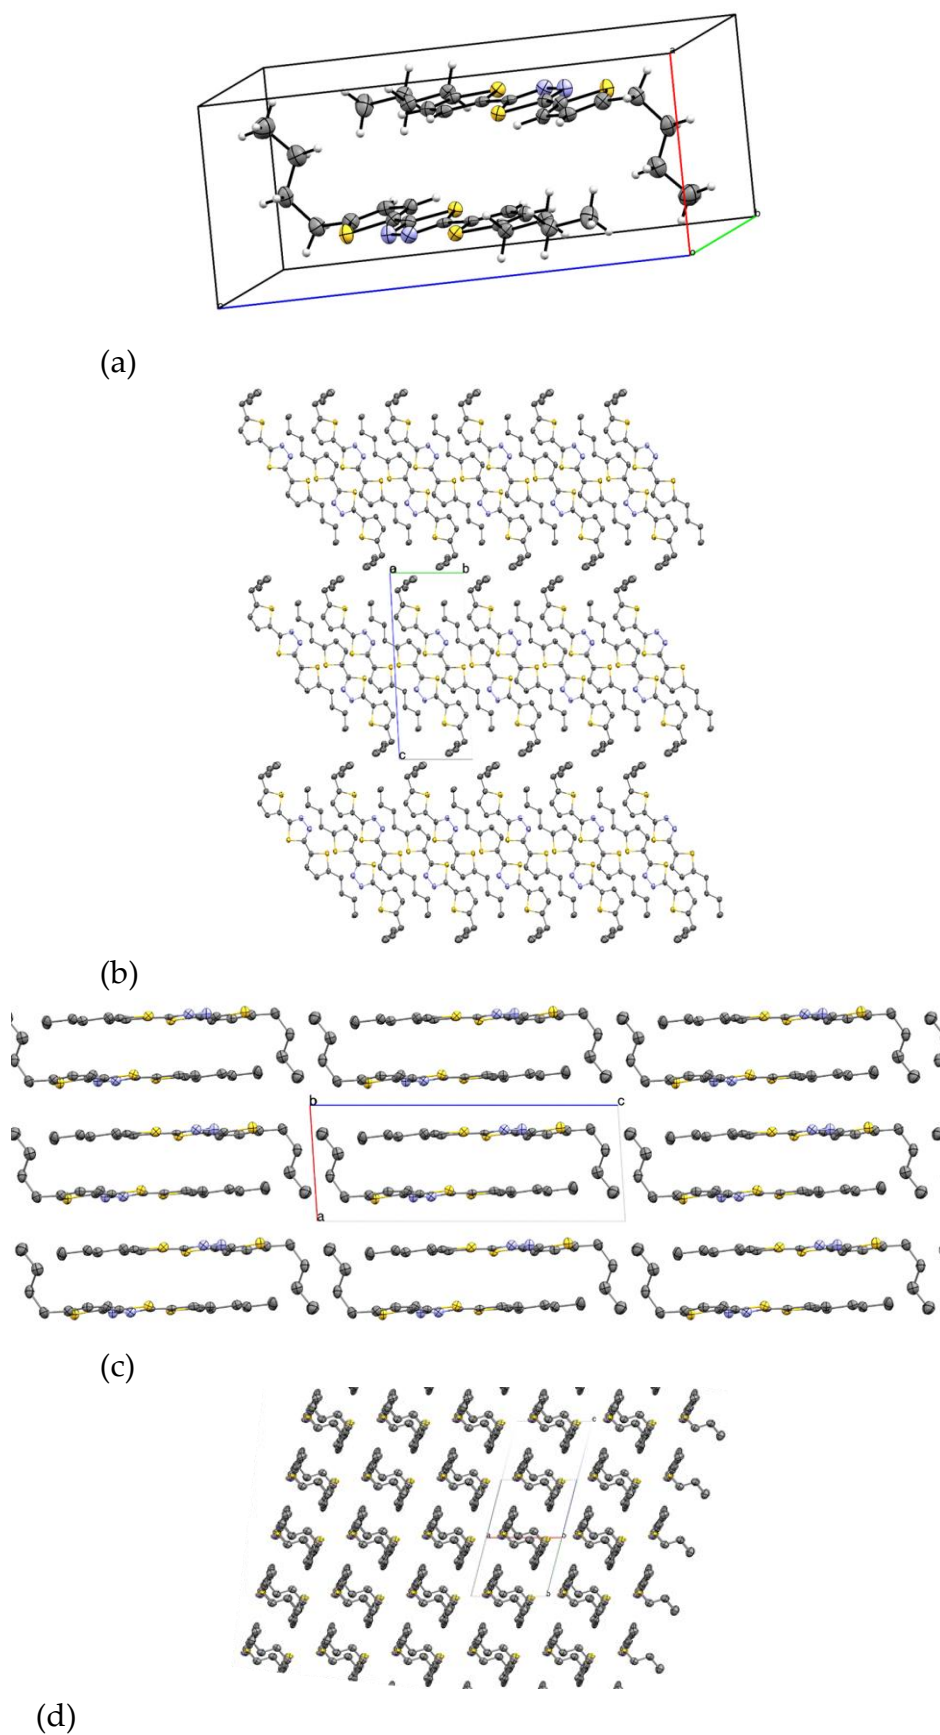

221  
222

**Figure S21.** Single crystal structure of Th-Thd-Th(4) showing the unit cell (a), lamellar order looking down the a- or b- axis (b and c respectively), and intra-layer packing looking down the c-axis (d).

a)

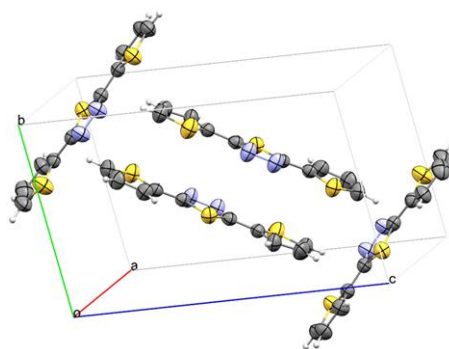

b)

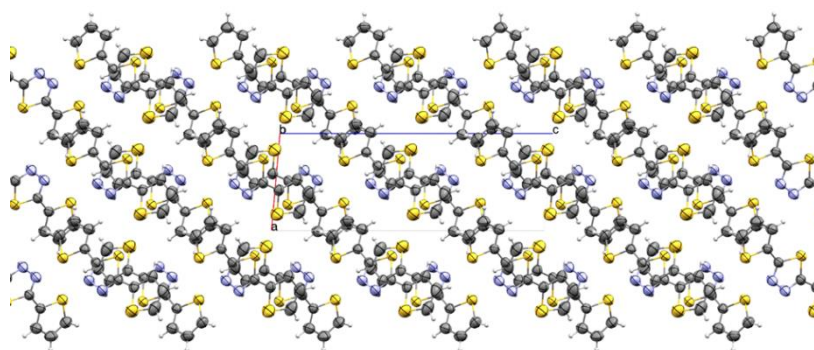

c)

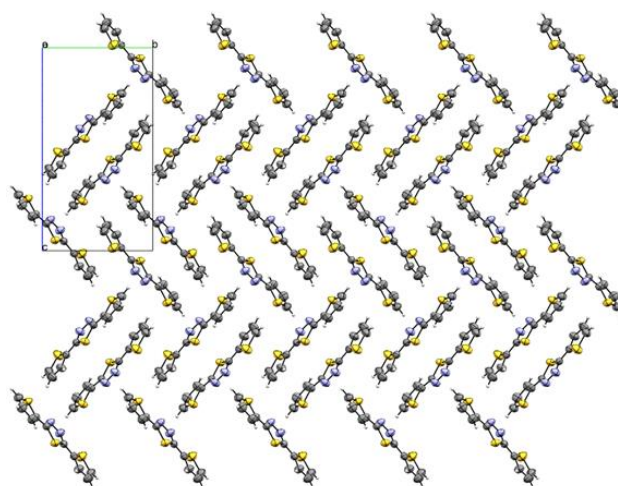223  
224

**Figure S22.** Single crystal structures of **Th-Thd-Th** showing the unit cell (a), order looking down the b-axis (b), and herringbone packing looking down the a-axis (c).

a)

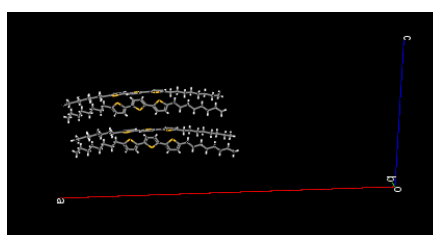

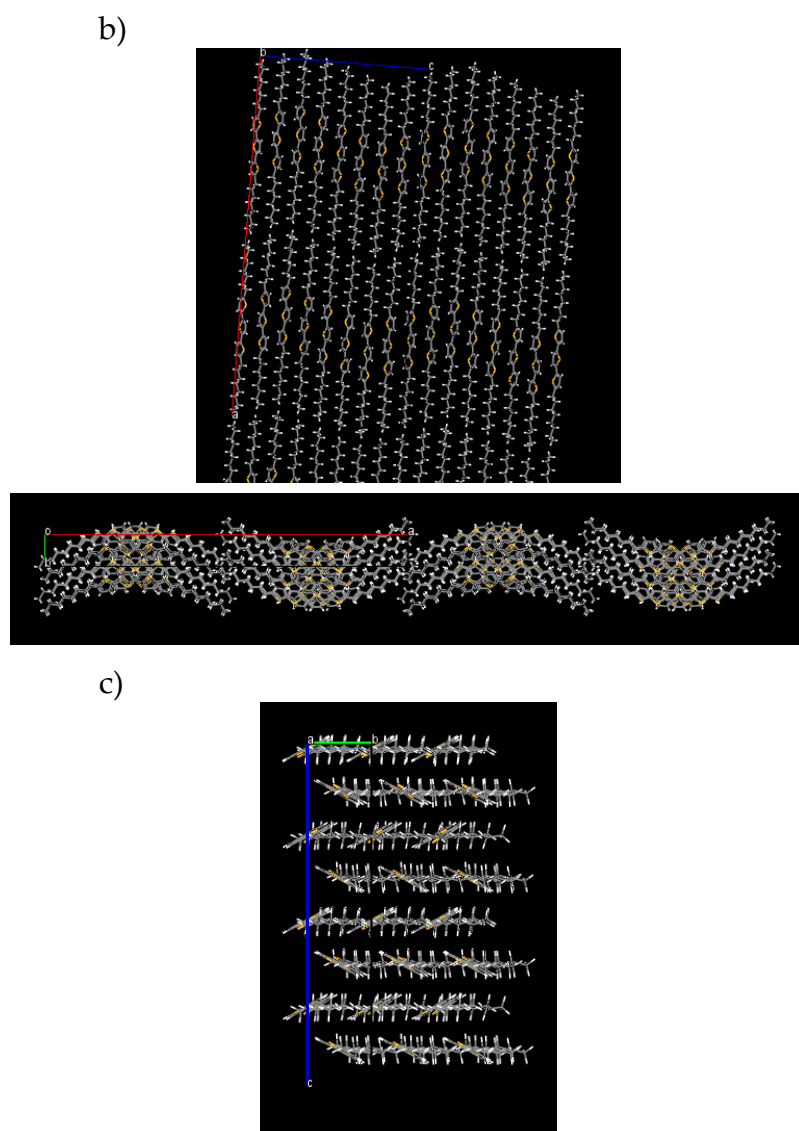

225  
226

**Figure S23.** Literature single crystal structures of **Th<sub>3</sub>(8)[9]** showing the unit cell (a), lamellar order (b), and intra-layer packing (c).

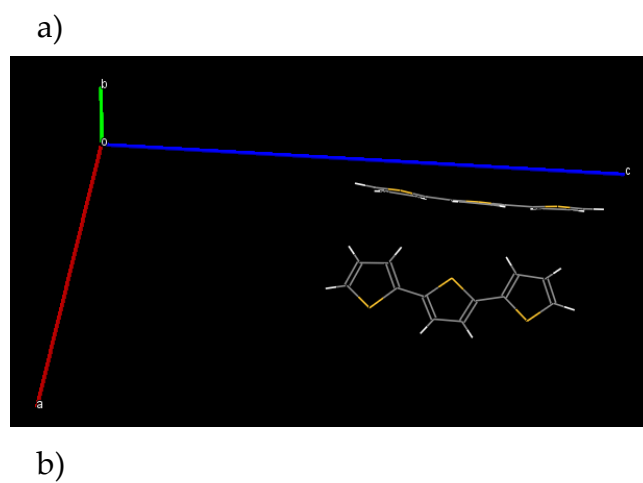

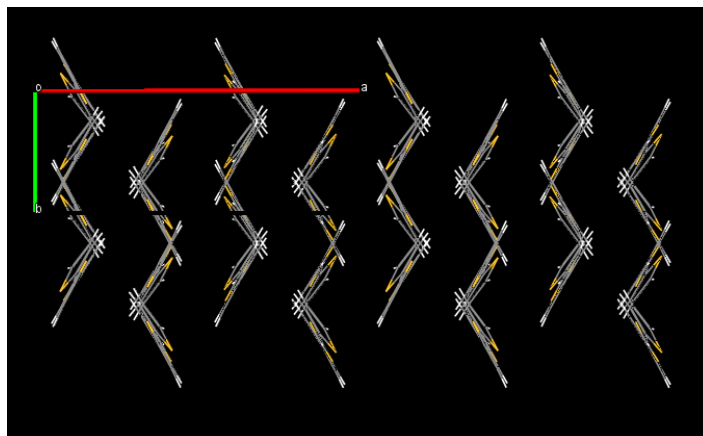

227  
228

**Figure S24.** Literature single crystal structures of Th<sub>3</sub>[10] showing the unit cell (a) and herringbone packing (b).

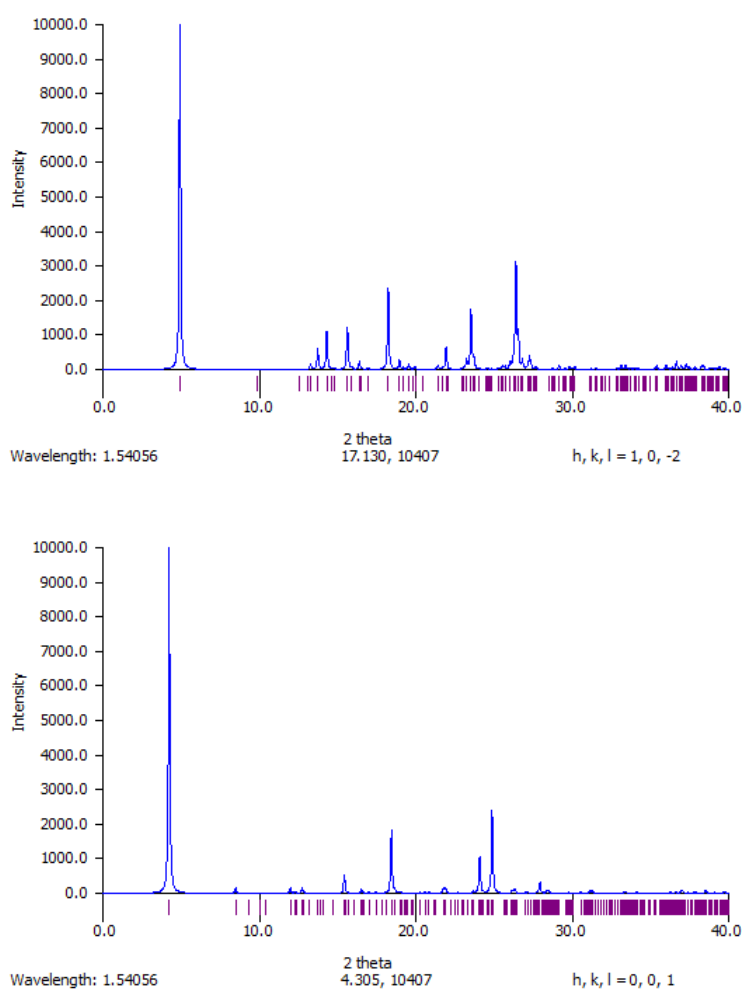

229  
230

**Figure S25.** Simulated powder XRD patterns of Th-Thd-Th(4) (a) and Th-Thd-Th(10) (b) as determined based on the single crystal structure.

## 231 7. UV/vis Absorption Spectroscopy

232

**Table S5.** Summary of UV-Vis spectral properties.

| Compound | $\lambda_{abs}^{max}$<br>(nm) | $\epsilon$<br>( $M^{-1}cm^{-1}$ ) | $\lambda_{abs}^{onset}$<br>(nm) | $E_{g,opt}$<br>(eV) <sup>a</sup> |
|----------|-------------------------------|-----------------------------------|---------------------------------|----------------------------------|
|----------|-------------------------------|-----------------------------------|---------------------------------|----------------------------------|

|                           |     |       |     |      |
|---------------------------|-----|-------|-----|------|
| <b>Th-Oxd-Th(10)</b>      | 328 | 28200 | 371 | 3.35 |
| <b>Th-Thd-Th(10)</b>      | 359 | 26800 | 409 | 3.04 |
| <b>Th<sub>3</sub>(10)</b> | 367 | 25900 | 423 | 2.93 |

233 <sup>a</sup>Optical bandgap, estimated by  $E_g = hc/\lambda_{abs}^{onset}$

a)

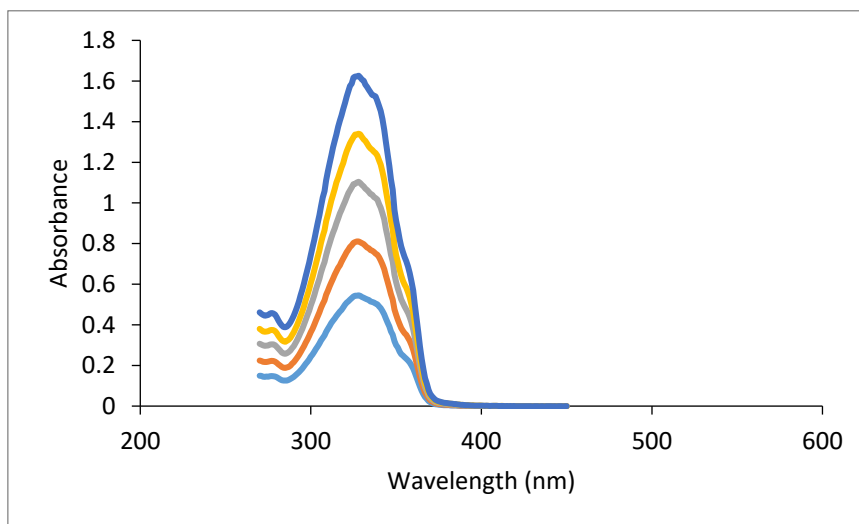

b)

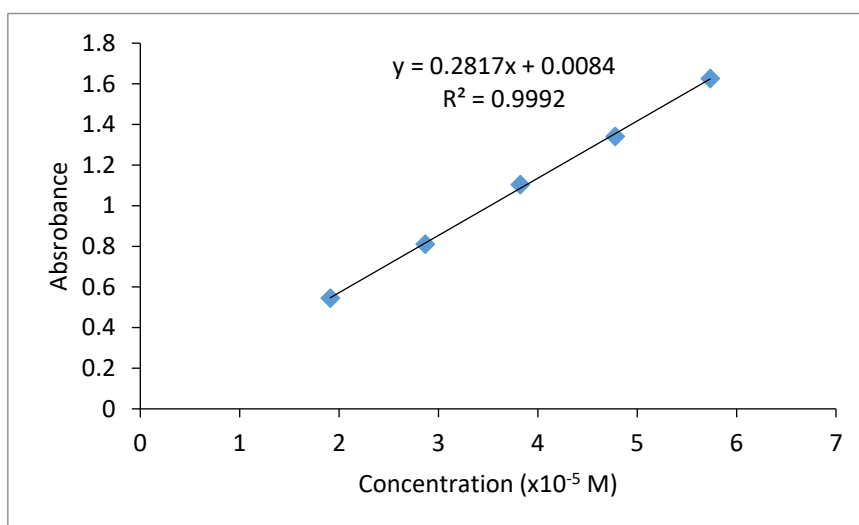

234  
235

**Figure S26.** Absorption spectra of **Th-Oxd-Th(10)** in chloroform at various concentrations ranging from around  $6 \times 10^{-5}$  to  $2 \times 10^{-5}$  M (top to bottom) (a) and the resulting Beer-Lambert plot (b).

a)

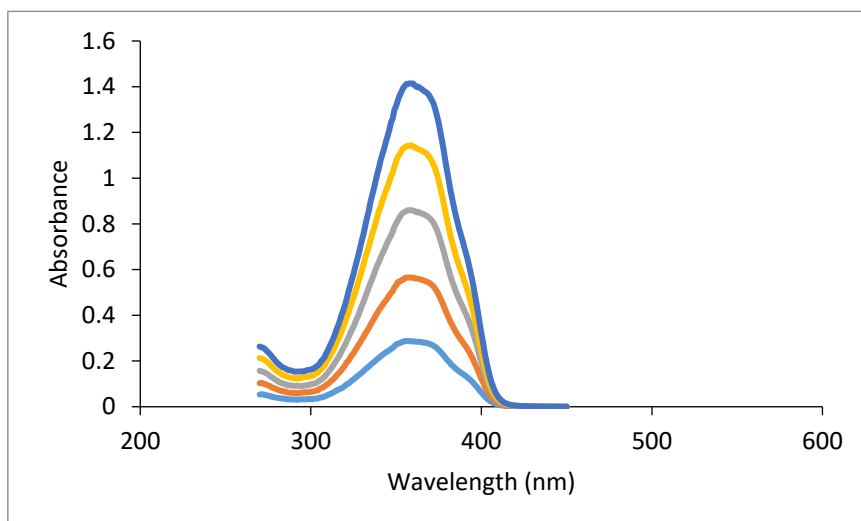

b)

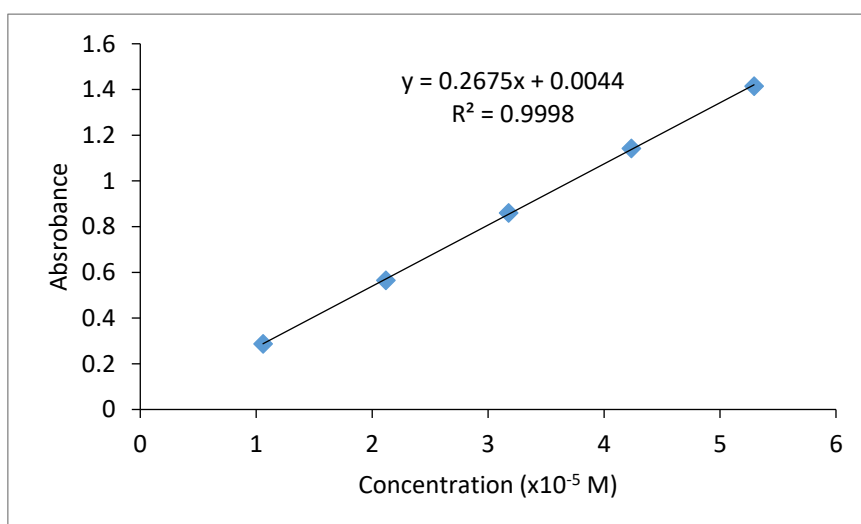

236  
237

**Figure S27.** Absorption spectra of **Th-Thd-Th(10)** in chloroform at various concentrations ranging from around  $5 \times 10^{-5}$  to  $1 \times 10^{-5}$  M (top to bottom) (a) and the resulting Beer-Lambert plot (b).

a)

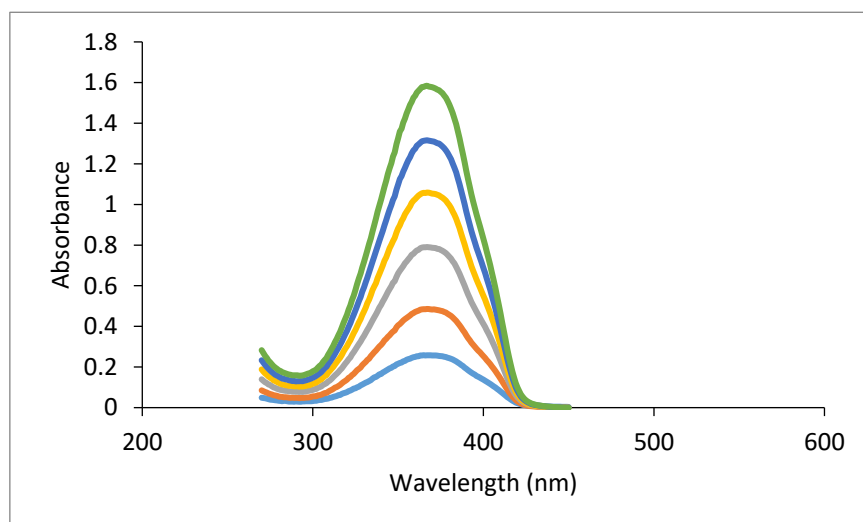

b)

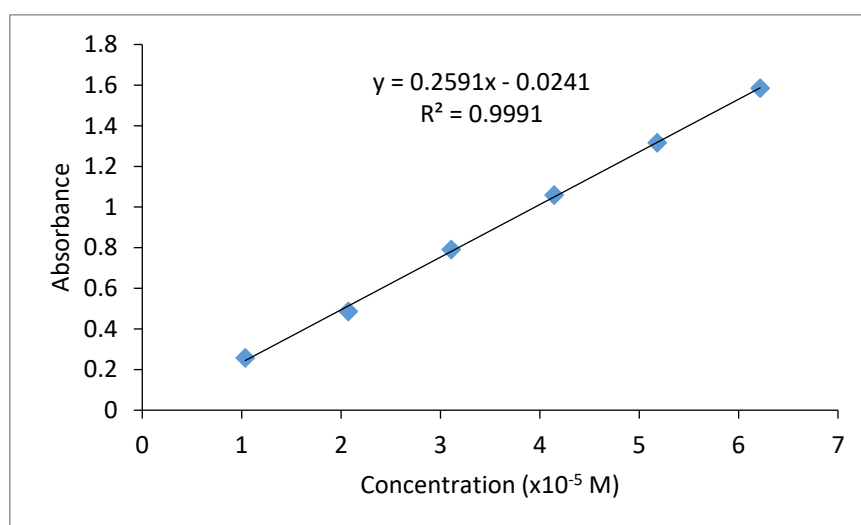

238 **Figure S28.** Absorption spectra of Th<sub>3</sub>(10) in chloroform at various concentrations ranging from  
 239 around  $6 \times 10^{-5}$  to  $1 \times 10^{-5}$  M (top to bottom) (a) and the resulting Beer-Lambert plot (b).

## 240 8. Fluorescence Excitation/Emission Spectroscopy

241

**Table S6.** Summary of fluorescence spectral properties.

| Compound             | $\lambda_{ex}^{max}$<br>(nm) <sup>a</sup> | $\lambda_{em}^{max}$<br>(nm) <sup>b</sup> | Stokes<br>shift<br>(nm) | $\Phi_f^c$ |
|----------------------|-------------------------------------------|-------------------------------------------|-------------------------|------------|
| Th-Oxd-Th(10)        | 340                                       | 387                                       | 47                      | 0.48       |
| Th-Thd-Th(10)        | 369                                       | 430                                       | 61                      | 0.49       |
| Th <sub>3</sub> (10) | 380                                       | 443                                       | 63                      | 0.56       |

242 <sup>a</sup> Observed at the corresponding  $\lambda_{em}^{max}$ ; <sup>b</sup> Measured at the respective  $\lambda_{ex}^{max}$ ; <sup>c</sup> Relative to quinine  
 243 sulfate standard ( $\Phi_f = 0.54$ ) in 0.1 M H<sub>2</sub>SO<sub>4</sub>

244

**Table S7.** Detailed fluorescence data used for quantum yield determination.

| Compound      | Concentration<br>(x10 <sup>-6</sup> M) | Maximum<br>absorbance,<br>A <sub>max</sub> | Integrated<br>emission<br>intensity, I <sub>em</sub> | I <sub>em</sub> /A <sub>max</sub><br>gradient <sup>a</sup> | $\Phi_f^b$ |
|---------------|----------------------------------------|--------------------------------------------|------------------------------------------------------|------------------------------------------------------------|------------|
| Th-Oxd-Th(10) | 0.96                                   | 552038                                     | 43751369                                             | 74.9                                                       | 0.48       |
|               | 1.91                                   | 898329                                     | 69736325                                             |                                                            |            |
|               | 2.87                                   | 1235771                                    | 94299072                                             |                                                            |            |
|               | 3.82                                   | 1567427                                    | 119646050                                            |                                                            |            |
|               | 4.78                                   | 1915589                                    | 145914659                                            |                                                            |            |
| Th-Thd-Th(10) | 2.12                                   | 275332                                     | 21930717                                             | 76.4                                                       | 0.49       |
|               | 6.35                                   | 559616                                     | 43049313                                             |                                                            |            |

|                           |       |         |           |      |      |
|---------------------------|-------|---------|-----------|------|------|
|                           | 8.47  | 696109  | 53070730  |      |      |
|                           | 10.59 | 828772  | 63336304  |      |      |
|                           | 12.70 | 983655  | 75462409  |      |      |
|                           | 16.94 | 1258332 | 97024851  |      |      |
| <b>Th<sub>3</sub>(10)</b> | 0.52  | 376360  | 38399486  |      |      |
|                           | 0.62  | 423623  | 42422719  |      |      |
|                           | 0.73  | 526075  | 51875681  | 87.1 | 0.56 |
|                           | 0.83  | 599034  | 58557104  |      |      |
|                           | 0.93  | 685502  | 64905104  |      |      |
| Quinine sulfate           | 6.65  | 622805  | 59563561  |      |      |
|                           | 8.87  | 792582  | 76626907  |      |      |
|                           | 11.09 | 985531  | 93600171  |      |      |
|                           | 13.30 | 1151426 | 110217780 | 98.2 | 0.54 |
|                           | 15.52 | 1305979 | 126343550 |      |      |
|                           | 17.74 | 1459479 | 142261748 |      |      |

245 <sup>a</sup> Determined from slope of  $I_{em}$  vs.  $A_{max}$  at various concentrations, see plots below; <sup>b</sup>  
 246 Calculated according to:  $\Phi_{f,x} = \Phi_{f,ref} (I_{em,x}/A_{max,x}) (A_{max,ref}/I_{em,ref}) (\eta_x/\eta_{ref})^2$ , [11] using the  
 247 quinine sulfate standard ( $\Phi_f = 0.54$ ) [12] in 0.1 M  $H_2SO_4$ , the gradients above determined  
 248 from experiment, and  $\eta_{chloroform} = 1.444$  and  $\eta_{water} = 1.333$ .

a)

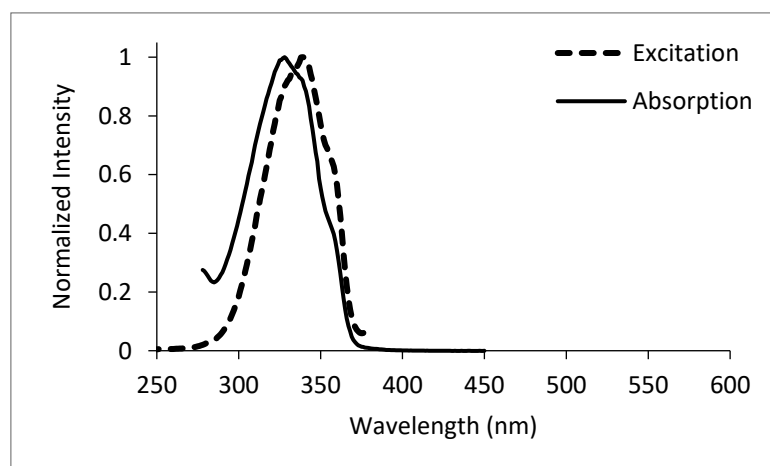

b)



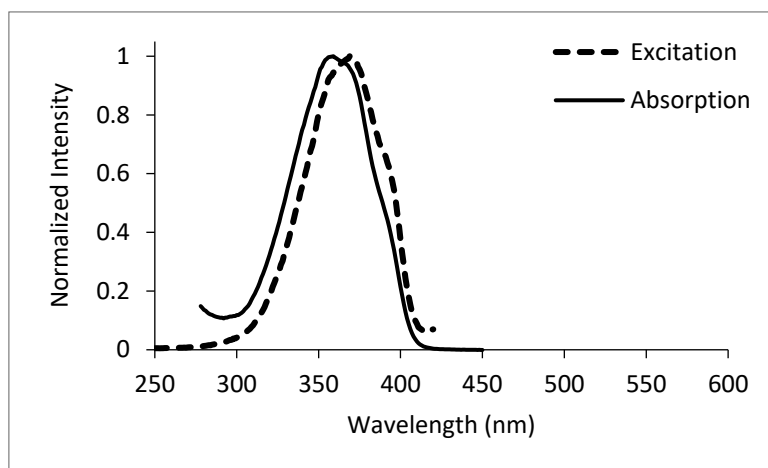

c)

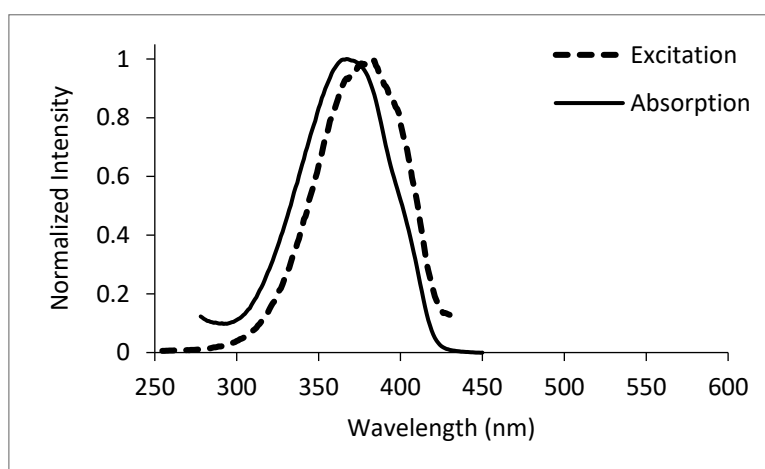

249

250  
251

**Figure S29.** Overlay of UV/vis absorption (solid line) and fluorescence excitation (dashed line) spectra of Th-Oxd-Th(10) (a), Th-Thd-Th(10) (b), and Th<sub>3</sub>(10) (c) in CHCl<sub>3</sub>.

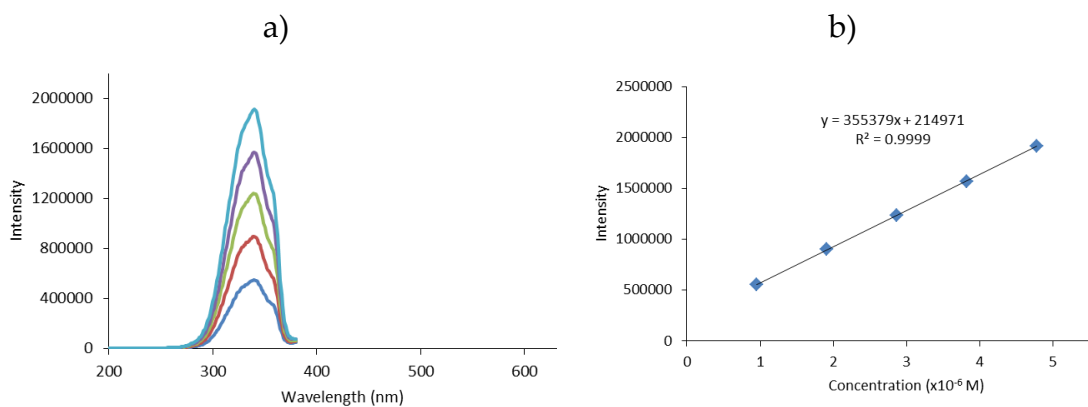

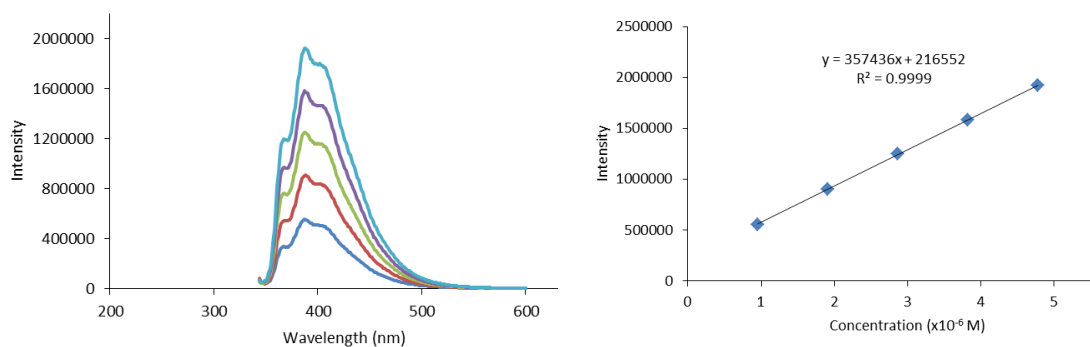

252  
253  
254

**Figure S30.** Fluorescence excitation (top) and emission (bottom) spectra of **Th-Oxd-Th(10)** in chloroform at various concentrations ranging from around  $5 \times 10^{-6}$  to  $1 \times 10^{-6}$  M (shown in descending order) (a) and the respective Beer-Lambert plots demonstrating the linear range (b).

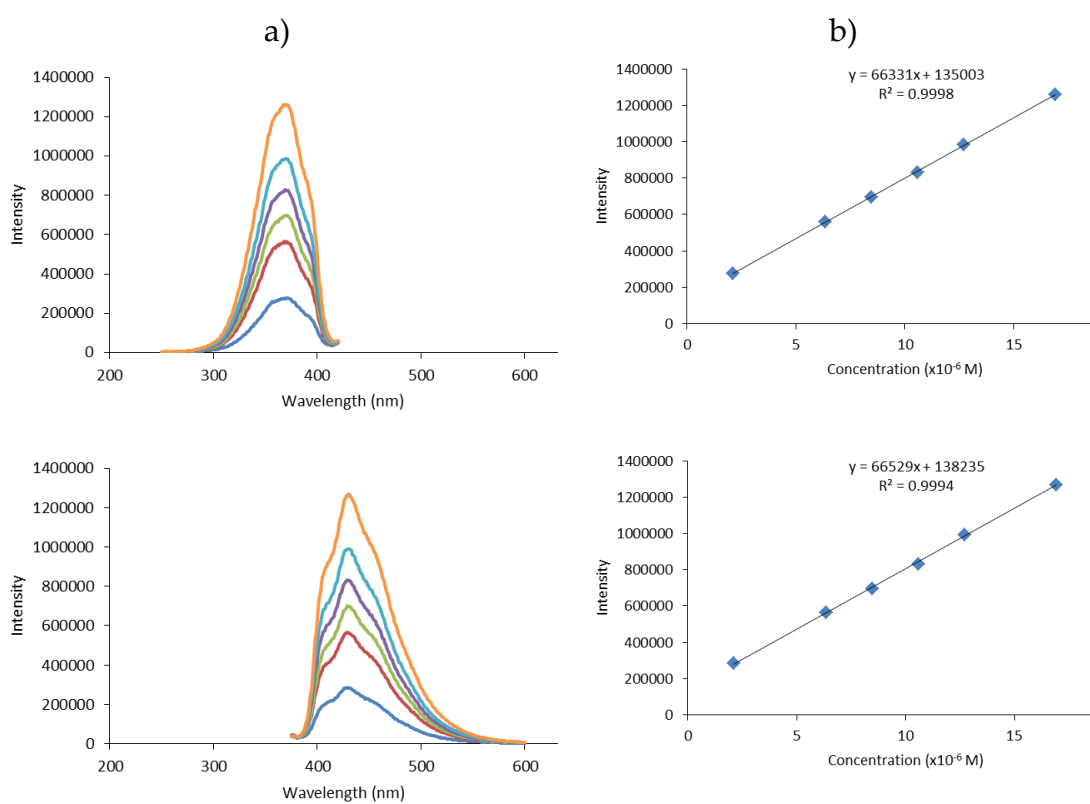

255  
256  
257

**Figure S31.** Fluorescence excitation (top) and emission (bottom) spectra of **Th-Thd-Th(10)** in chloroform at various concentrations ranging from around  $16 \times 10^{-6}$  to  $2 \times 10^{-6}$  M (shown in descending order) (a) and the respective Beer-Lambert plots demonstrating the linear range (b).

a)

b)

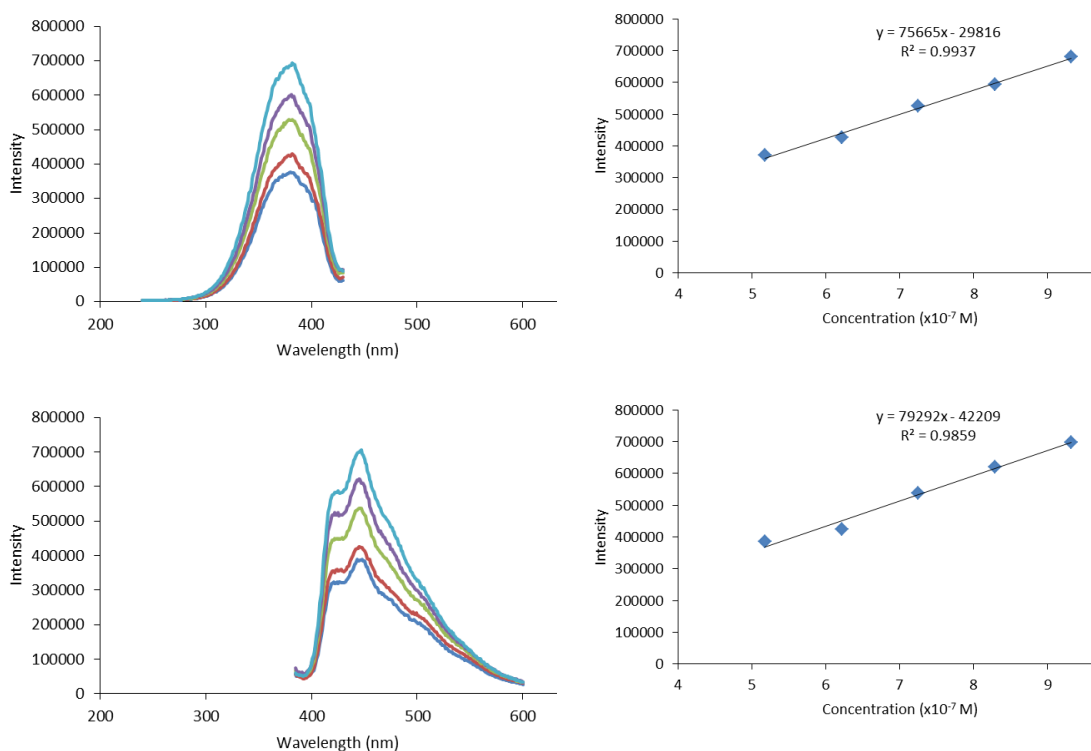

258  
259  
260

**Figure S32.** Fluorescence excitation (top) and emission (bottom) spectra of Th<sub>3</sub>(10) in chloroform at various concentrations ranging from around  $9 \times 10^{-7}$  to  $5 \times 10^{-7}$  M (shown in descending order) (a) and the respective Beer-Lambert plots demonstrating the linear range (b).

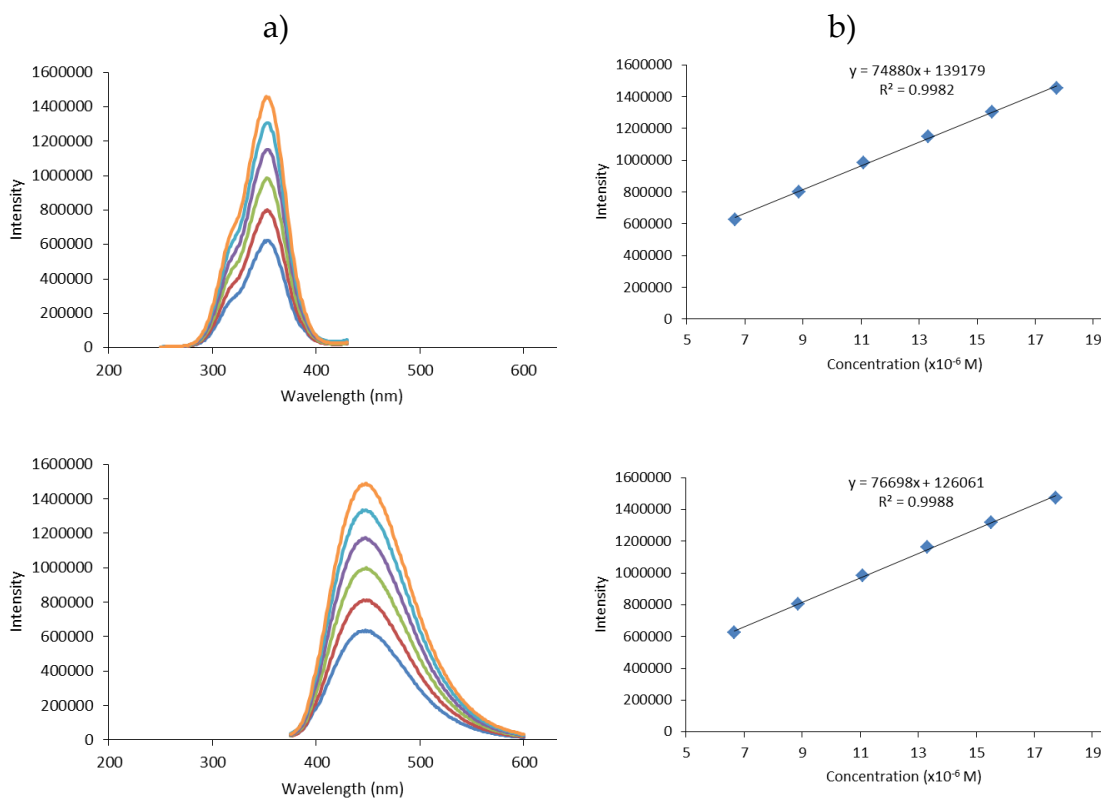

261  
262  
263

**Figure S33.** Fluorescence excitation (top) and emission (bottom) spectra of quinine sulfate in 0.1 M sulfuric acid at various concentrations ranging from around  $17 \times 10^{-6}$  to  $6 \times 10^{-6}$  M (shown in descending order) (a) and the respective Beer-Lambert plots demonstrating the linear range (b).

a)

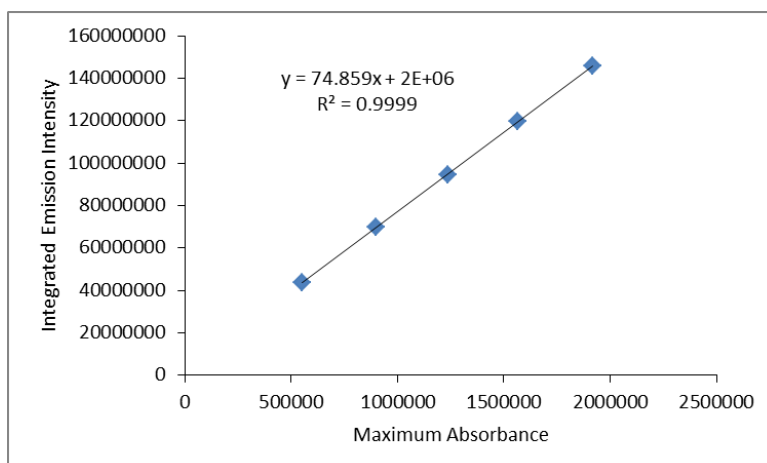

b)

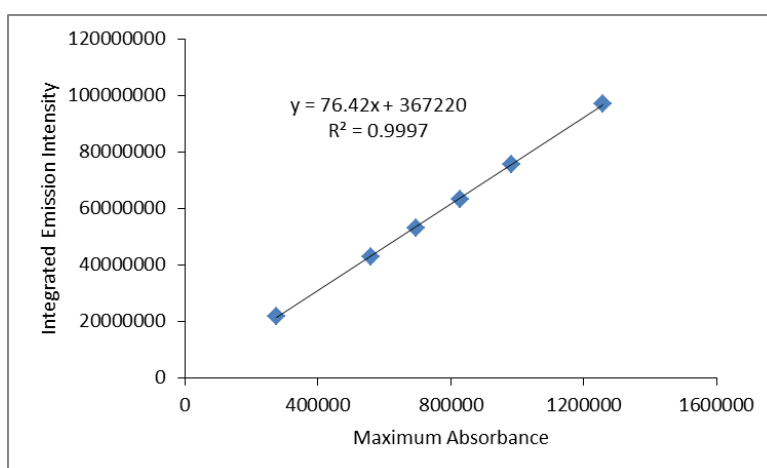

c)

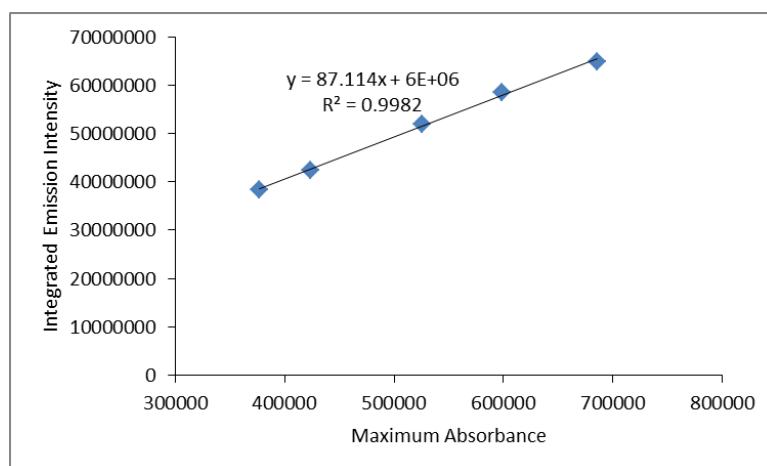

d)

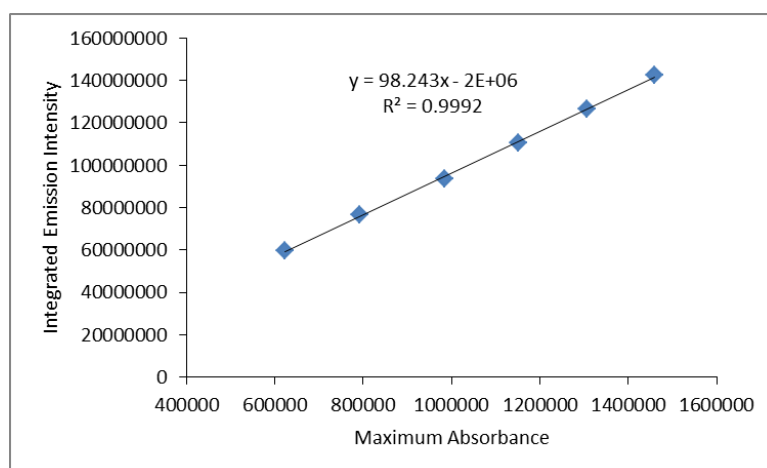

264 **Figure S34.** Integrated emission intensity vs. maximum absorbance plots created based on the  
 265 fluorescence spectra at various concentrations shown above for **Th-Oxd-Th(10)** (a), **Th-Thd-Th(10)**  
 266 (b), **Th<sub>3</sub>(10)** (c), and quinine sulfate (d).

### 267 9. Cyclic Voltammetry (CV)

268 Cyclic voltammetry scans were performed on a PAR-263A potentiometer. All analytes were  
 269 scanned as 1.0 mM solutions in THF (**Th-Ox-Th(10)** and **Th-Thd-Th(6)** reduction) or MeCN (**Th-**  
 270 **Thd-Th(6)** oxidation) with a 0.1 M tetrabutylammonium perchlorate supporting electrolyte. The  
 271 apparatus was a 20 ml glass cell equipped with a glassy carbon working electrode, platinum counter  
 272 electrode and silver wire reference electrode. All scans were reference internally to a Fc/Fc<sup>+</sup> reversible  
 273 redox couple.

274 **Table S8.** Summary of the raw CV data for select compounds.

| Compound             | Process/ solvent | Analyte (compound)    |                       |                                      | Ferrocene reference |                    |                         |
|----------------------|------------------|-----------------------|-----------------------|--------------------------------------|---------------------|--------------------|-------------------------|
|                      |                  | E <sub>a</sub><br>(V) | E <sub>c</sub><br>(V) | E <sup>1/2</sup><br>(V) <sup>a</sup> | E <sub>a</sub> (V)  | E <sub>c</sub> (V) | E <sup>1/2</sup><br>(V) |
| <b>Th-Oxd-Th(10)</b> | Reduction/ THF   | n/a, irreversible     |                       |                                      | 1.29                | 0.53               | 0.91                    |
| <b>Th-Thd-Th(6)</b>  | Reduction/ THF   | -1.32                 | -1.64                 | -1.48                                | 1.35                | 0.50               | 0.93                    |
|                      | Oxidation/ MeCN  | n/a, irreversible     |                       |                                      | 0.92                | 0.56               | 0.74                    |

275 <sup>a</sup> Irreversible processes estimated based on middle of onset slope

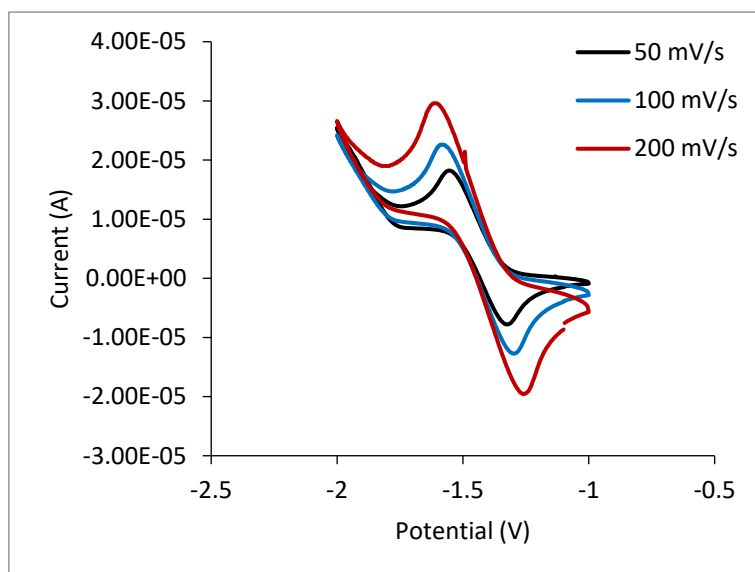

276

277  
278

**Figure S35.** Unprocessed cyclic voltammograms showing the reversible reduction of **Th-Thd-Th(6)** at different scan rates.

a)

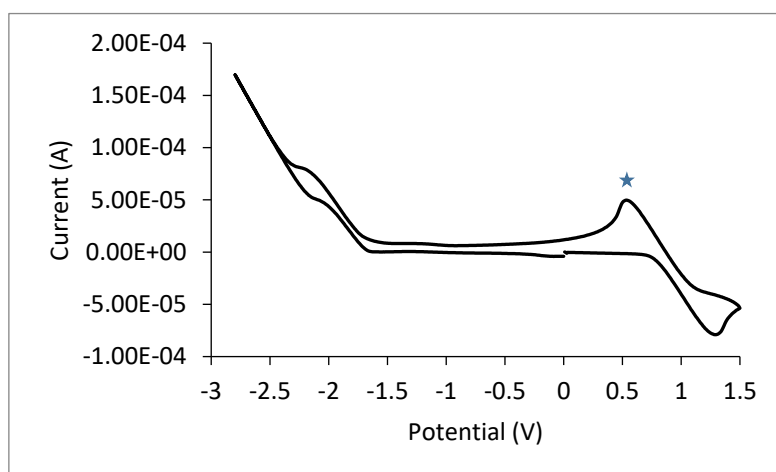

b)

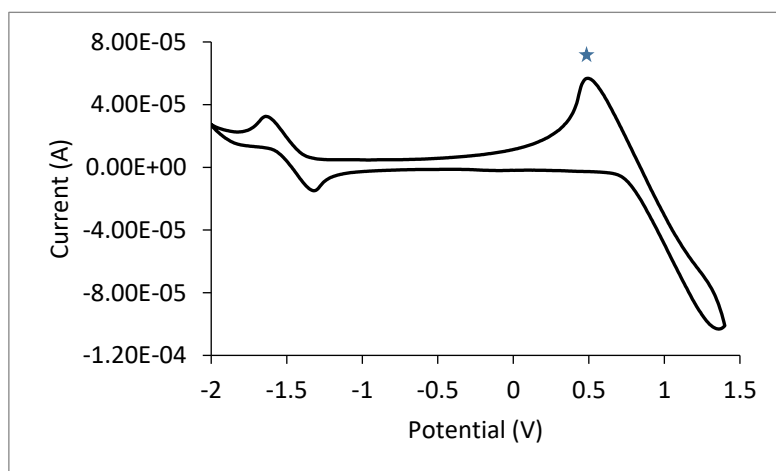

c)

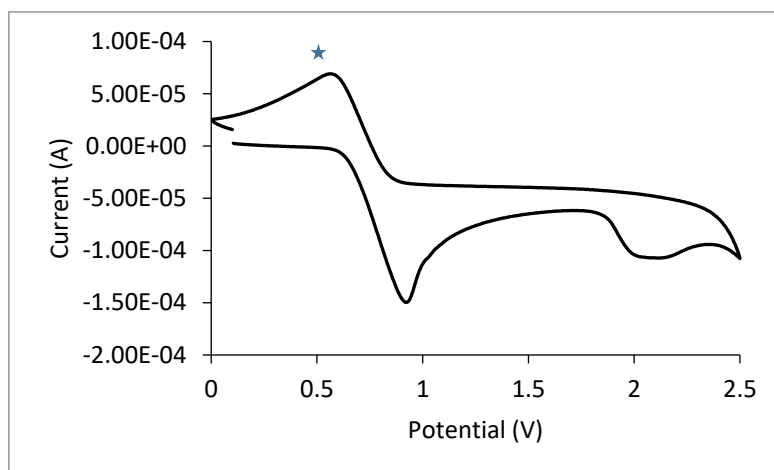

279

280

281

282

**Figure S36.** Unprocessed cyclic voltammograms showing the ferrocene internal standard signal (blue star) used for reference for **Th-Oxd-Th(10)** reduction in THF (a), **Th-Thd-Th(6)** reduction in THF (b), and **Th-Thd-Th(6)** oxidation in MeCN (c).

## 283 10. DFT and TD-DFT Calculations

284

285

286

287

288

*Density functional theory (DFT)* – DFT calculations were carried out using B3LYP functional[13,14] and 6-31G\* basis set (C, H, N, O, S)[15–18] in Gaussian 16[19] to determine the optimized molecular structures (Figure 6) as well as the frontier molecular orbitals and respective HOMO/LUMO energy levels (Figure S36). All of these results were consistent with those obtained by different basis sets used during TD-DFT calculations (see following).

289

290

291

292

293

294

295

296

297

*Time-dependent density functional theory (TD-DFT)* – Geometry optimization calculations were completed using the Gaussian 16 program (Revision B.01)[19], the restricted B3LYP functional[13,14], the 6-31G\* basis set (C, H, N, O, S), with a polarized continuum model (PCM) for CHCl<sub>3</sub> (dielectric  $\epsilon = 4.9$ ).[15–18] Frequency calculations at the same level of theory confirmed that the optimized structures were located at a minimum on the potential energy surface. Single-point calculations were done using restricted B3LYP functional, the TZVP basis set (C, H, N, O, S)[20,21], with a PCM for CHCl<sub>3</sub>. The intensities of 30 lowest energy transitions using TD-DFT[22,23] calculations were performed using the CAM-B3LYP functional[24–26], the TZVP basis set (C, H, N, O, S), with a PCM for CHCl<sub>3</sub>.

298

**Table S9.** Summary of predicted properties determined by DFT (B3LYP/6-31G\*).

| Compound                  | Gas phase |           |                          | Solvated in THF |           |                          |
|---------------------------|-----------|-----------|--------------------------|-----------------|-----------|--------------------------|
|                           | HOMO (eV) | LUMO (eV) | $E_g^{\text{calc}}$ (eV) | HOMO (eV)       | LUMO (eV) | $E_g^{\text{calc}}$ (eV) |
| <b>Th<sub>3</sub>(10)</b> | -4.88     | -1.51     | 3.37                     | -5.05           | -1.69     | 3.36                     |
| <b>Th-Oxd-Th(10)</b>      | -5.59     | -1.62     | 3.97                     | -5.77           | -1.80     | 3.97                     |
| <b>Th-Thd-Th(10)</b>      | -5.54     | -1.90     | 3.64                     | -5.71           | -2.08     | 3.62                     |
| <b>Th-Thd-Th(6)</b>       | -5.54     | -1.90     | 3.64                     | -5.71           | -2.09     | 3.62                     |

299

**Table S10.** Summary of predicted properties determined by TD-DFT (CAM-B3LYP/TZVP).

| Compound | TD-DFT |
|----------|--------|
|----------|--------|

|                           | $\lambda_{abs}^{max}$<br>(nm) | $f^a$ | $E_g^{opt}$<br>(eV) <sup>b</sup> |
|---------------------------|-------------------------------|-------|----------------------------------|
| <b>Th<sub>3</sub>(10)</b> | 383                           | 1.15  | 2.67                             |
| <b>Th-Oxd-Th(10)</b>      | 323                           | 1.16  | 3.26                             |
| <b>Th-Thd-Th(10)</b>      | 354                           | 1.18  | 2.94                             |

<sup>a</sup>Oscillator strength

<sup>b</sup>Optical bandgap, estimated by  $E_g = hc/\lambda_{abs}^{onset}$

300  
301  
302

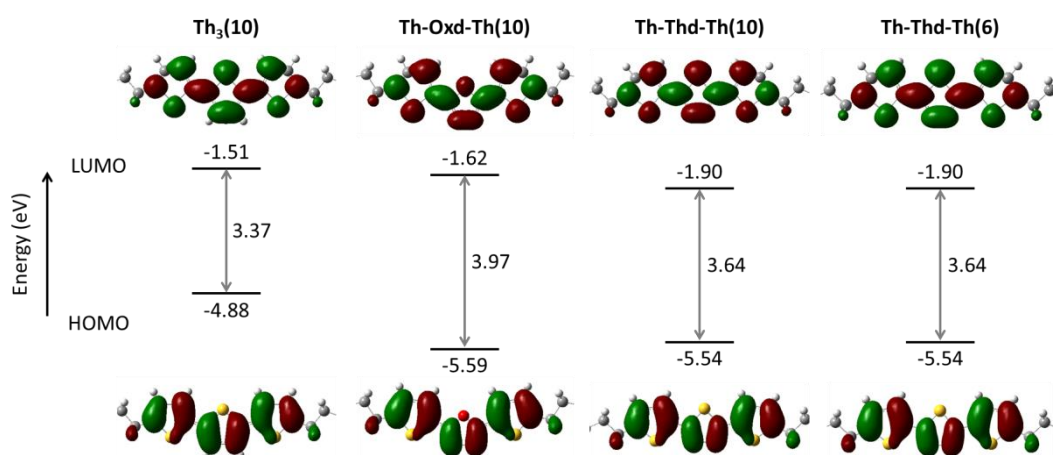

303  
304  
305

**Figure S37.** Frontier molecular orbitals of select compounds calculated by DFT at B3LYP/6-31G\* level.

a)

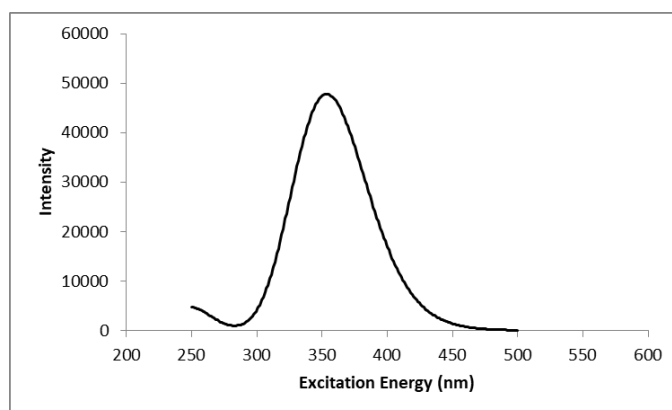

b)



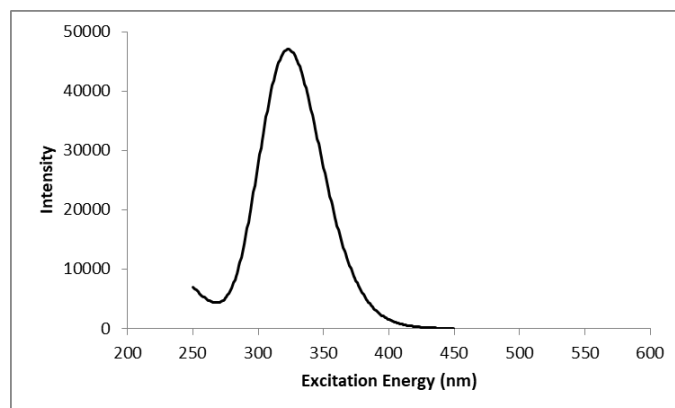

c)

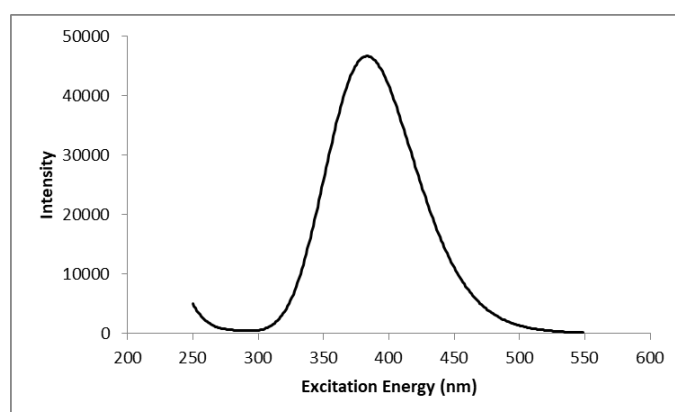

306

307 **Figure S38.** TD-DFT predicted UV/vis spectra in chloroform of **Th<sub>3</sub>(10)** (a), **Th-Oxd-Th(10)** (b), and  
 308 **Th-Thd-Th(10)** (c).

### 309 11. Complete List of Computational Data

#### 310 Optimized coordinates (Å) for Th-Oxd-Th(10):

|     |   |             |             |             |
|-----|---|-------------|-------------|-------------|
| 311 | C | 1.06861315  | -2.08694106 | 0.00077733  |
| 312 | C | -1.06861352 | -2.08694115 | 0.00071126  |
| 313 | C | 2.39766853  | -1.54132287 | -0.00139990 |
| 314 | C | 2.77436144  | -0.21785222 | -0.00711548 |
| 315 | S | 3.79545595  | -2.59381429 | 0.00380009  |
| 316 | C | 4.18572883  | -0.04510711 | -0.00774990 |
| 317 | H | 2.06185720  | 0.59918123  | -0.01079215 |
| 318 | C | 4.88823187  | -1.22612957 | -0.00253064 |
| 319 | H | 4.66347744  | 0.92751470  | -0.01198087 |
| 320 | C | -2.39766880 | -1.54132337 | -0.00161983 |
| 321 | C | -2.77436145 | -0.21785256 | -0.00731636 |
| 322 | S | -3.79545651 | -2.59381625 | 0.00318546  |
| 323 | C | -4.18572881 | -0.04510757 | -0.00804950 |
| 324 | H | -2.06185703 | 0.59918136  | -0.01084878 |
| 325 | C | -4.88823212 | -1.22613025 | -0.00291490 |
| 326 | H | -4.66347720 | 0.92751460  | -0.01222002 |
| 327 | N | 0.69495173  | -3.33705542 | 0.00614971  |
| 328 | N | -0.69495230 | -3.33705639 | 0.00589109  |
| 329 | C | 6.37730125  | -1.45485264 | -0.00210701 |
| 330 | H | 6.64913616  | -2.06181825 | 0.87321688  |

|     |   |              |             |             |
|-----|---|--------------|-------------|-------------|
| 331 | H | 6.64960845   | -2.06146371 | -0.87757292 |
| 332 | C | 7.21222653   | -0.16644298 | -0.00169072 |
| 333 | H | 6.95424034   | 0.43684545  | -0.88254785 |
| 334 | H | 6.95256581   | 0.43731071  | 0.87835320  |
| 335 | C | 8.72046191   | -0.44679165 | -0.00034091 |
| 336 | H | 8.97778842   | -1.05622778 | -0.87899553 |
| 337 | H | 8.97639213   | -1.05525476 | 0.87939382  |
| 338 | C | 9.57263471   | 0.82886404  | -0.00039303 |
| 339 | H | 9.31489655   | 1.43723484  | -0.87997259 |
| 340 | H | 9.31352133   | 1.43825006  | 0.87807735  |
| 341 | C | 11.08204180  | 0.55434118  | 0.00093129  |
| 342 | H | 11.34045757  | -0.05583227 | -0.87730798 |
| 343 | H | 11.33914876  | -0.05461481 | 0.88039787  |
| 344 | C | 11.93592221  | 1.82897310  | 0.00067000  |
| 345 | H | 11.67705214  | 2.43912377  | 0.87889034  |
| 346 | H | 11.67831709  | 2.43789854  | -0.87877272 |
| 347 | C | 13.44553753  | 1.55547064  | 0.00193890  |
| 348 | H | 13.70423043  | 0.94509834  | -0.87622063 |
| 349 | H | 13.70300327  | 0.94644163  | 0.88139028  |
| 350 | C | 14.30000861  | 2.82952366  | 0.00155407  |
| 351 | H | 14.04226918  | 3.44048647  | 0.87974964  |
| 352 | H | 14.04348258  | 3.43913280  | -0.87793698 |
| 353 | C | 15.80965123  | 2.55653223  | 0.00280353  |
| 354 | H | 16.06751629  | 1.94662021  | -0.87482891 |
| 355 | H | 16.06631717  | 1.94801871  | 0.88175698  |
| 356 | C | -6.37730151  | -1.45485311 | -0.00253797 |
| 357 | H | -6.64960136  | -2.06129019 | -0.87812652 |
| 358 | H | -6.64914399  | -2.06199258 | 0.87266316  |
| 359 | C | -7.21222663  | -0.16644339 | -0.00187290 |
| 360 | H | -6.95422436  | 0.43702490  | -0.88260214 |
| 361 | H | -6.95258163  | 0.43713048  | 0.87829899  |
| 362 | C | -8.72046207  | -0.44679200 | -0.00060999 |
| 363 | H | -8.97641050  | -1.05543125 | 0.87899758  |
| 364 | H | -8.97777064  | -1.05605206 | -0.87939196 |
| 365 | C | -9.57263461  | 0.82886387  | -0.00042410 |
| 366 | H | -9.31487576  | 1.43741292  | -0.87987429 |
| 367 | H | -9.31354154  | 1.43807172  | 0.87817585  |
| 368 | C | -11.08204175 | 0.55434112  | 0.00080914  |
| 369 | H | -11.33916919 | -0.05479501 | 0.88014500  |
| 370 | H | -11.34043741 | -0.05565229 | -0.87756110 |
| 371 | C | -11.93592184 | 1.82897329  | 0.00078963  |
| 372 | H | -11.67829497 | 2.43808021  | -0.87852102 |
| 373 | H | -11.67707320 | 2.43894256  | 0.87914228  |
| 374 | C | -13.44553726 | 1.55547096  | 0.00196491  |
| 375 | H | -13.70302454 | 0.94625918  | 0.88128339  |
| 376 | H | -13.70420900 | 0.94528133  | -0.87632779 |
| 377 | C | -14.30000797 | 2.82952426  | 0.00182434  |
| 378 | H | -14.04345988 | 3.43931684  | -0.87753308 |
| 379 | H | -14.04229034 | 3.44030374  | 0.88015380  |
| 380 | C | -15.80965070 | 2.55653298  | 0.00297909  |
| 381 | H | -16.06633871 | 1.94783575  | 0.88179890  |
| 382 | H | -16.06749411 | 1.94680457  | -0.87478728 |

|     |   |              |             |             |
|-----|---|--------------|-------------|-------------|
| 383 | C | -16.65554604 | 3.83407879  | 0.00278355  |
| 384 | H | -16.44637672 | 4.44739458  | -0.88259487 |
| 385 | H | -17.72753839 | 3.60505452  | 0.00362778  |
| 386 | H | -16.44520612 | 4.44844191  | 0.88715775  |
| 387 | C | 16.65554688  | 3.83407775  | 0.00236187  |
| 388 | H | 17.72753913  | 3.60505337  | 0.00328081  |
| 389 | H | 16.44639984  | 4.44720832  | -0.88315009 |
| 390 | H | 16.44518506  | 4.44862597  | 0.88660225  |
| 391 | O | -0.00000010  | -1.23211328 | -0.00293686 |

392 **Optimized coordinates (Å) for Th-Thd-Th(10):**

|     |   |              |             |             |
|-----|---|--------------|-------------|-------------|
| 393 | C | -1.20806377  | 0.50845006  | -0.08189367 |
| 394 | C | 1.20806231   | 0.50844896  | -0.08186841 |
| 395 | C | -2.62897218  | 0.26196466  | -0.10378363 |
| 396 | C | -3.30724199  | -0.93120312 | -0.21603580 |
| 397 | S | -3.75383772  | 1.60215727  | 0.02841576  |
| 398 | C | -4.72047485  | -0.77714338 | -0.19652581 |
| 399 | H | -2.81147972  | -1.89206474 | -0.30921571 |
| 400 | C | -5.13166814  | 0.52795398  | -0.07024494 |
| 401 | H | -5.40815518  | -1.61115399 | -0.27339070 |
| 402 | C | 2.62897093   | 0.26196222  | -0.10372872 |
| 403 | C | 3.30724201   | -0.93120506 | -0.21597812 |
| 404 | S | 3.75383480   | 1.60215297  | 0.02850384  |
| 405 | C | 4.72047463   | -0.77714681 | -0.19643585 |
| 406 | H | 2.81148083   | -1.89206528 | -0.30917861 |
| 407 | C | 5.13166637   | 0.52794882  | -0.07013243 |
| 408 | H | 5.40815598   | -1.61115720 | -0.27329419 |
| 409 | N | -0.67872948  | 1.70492656  | 0.03120256  |
| 410 | N | 0.67872675   | 1.70492594  | 0.03121690  |
| 411 | C | -6.52843051  | 1.08964312  | -0.01520250 |
| 412 | H | -6.63703425  | 1.69821823  | 0.89371850  |
| 413 | H | -6.67075511  | 1.78587795  | -0.85425675 |
| 414 | C | -7.63742108  | 0.02837637  | -0.04680507 |
| 415 | H | -7.54715630  | -0.56880960 | -0.96422752 |
| 416 | H | -7.50229530  | -0.66611570 | 0.79336948  |
| 417 | C | -9.03990065  | 0.64625750  | 0.02226512  |
| 418 | H | -9.17222518  | 1.34284177  | -0.81852838 |
| 419 | H | -9.12561737  | 1.25118318  | 0.93680907  |
| 420 | C | -10.16370184 | -0.39780305 | -0.00177323 |
| 421 | H | -10.07753765 | -1.00321688 | -0.91622769 |
| 422 | H | -10.02923954 | -1.09455842 | 0.83884452  |
| 423 | C | -11.56787885 | 0.21628248  | 0.06913067  |
| 424 | H | -11.70294970 | 0.91089331  | -0.77327290 |
| 425 | H | -11.65144896 | 0.82523051  | 0.98159146  |
| 426 | C | -12.69382056 | -0.82574116 | 0.05176856  |
| 427 | H | -12.55817735 | -1.52007882 | 0.89440866  |
| 428 | H | -12.61038804 | -1.43514402 | -0.86048329 |
| 429 | C | -14.09796667 | -0.21162192 | 0.12344441  |
| 430 | H | -14.23434321 | 0.48104843  | -0.72048688 |
| 431 | H | -14.18006524 | 0.39991695  | 1.03443403  |
| 432 | C | -15.22472807 | -1.25259941 | 0.11041363  |
| 433 | H | -15.08953979 | -1.94519598 | 0.95476991  |

|     |   |              |             |             |
|-----|---|--------------|-------------|-------------|
| 434 | H | -15.14373892 | -1.86493410 | -0.80029356 |
| 435 | C | -16.62884142 | -0.63855282 | 0.18189774  |
| 436 | H | -16.76479738 | 0.05219514  | -0.66254269 |
| 437 | H | -16.70983608 | -0.02632273 | 1.09146857  |
| 438 | C | 6.52842797   | 1.08963542  | -0.01504594 |
| 439 | H | 6.67075337   | 1.78593260  | -0.85404804 |
| 440 | H | 6.63702916   | 1.69814343  | 0.89392059  |
| 441 | C | 7.63741992   | 0.02837253  | -0.04672512 |
| 442 | H | 7.54715185   | -0.56875040 | -0.96418831 |
| 443 | H | 7.50229921   | -0.66617767 | 0.79340221  |
| 444 | C | 9.03989870   | 0.64625129  | 0.02238311  |
| 445 | H | 9.12562012   | 1.25110739  | 0.93697263  |
| 446 | H | 9.17221608   | 1.34290006  | -0.81835809 |
| 447 | C | 10.16370221  | -0.39780474 | -0.00174333 |
| 448 | H | 10.07753458  | -1.00314607 | -0.91624547 |
| 449 | H | 10.02924615  | -1.09462729 | 0.83881974  |
| 450 | C | 11.56787801  | 0.21627877  | 0.06920174  |
| 451 | H | 11.65145398  | 0.82514851  | 0.98171422  |
| 452 | H | 11.70293960  | 0.91096257  | -0.77314316 |
| 453 | C | 12.69382278  | -0.82573984 | 0.05173967  |
| 454 | H | 12.61038518  | -1.43506245 | -0.86056533 |
| 455 | H | 12.55818835  | -1.52015233 | 0.89431953  |
| 456 | C | 14.09796741  | -0.21162234 | 0.12345875  |
| 457 | H | 14.18007275  | 0.39983248  | 1.03450416  |
| 458 | H | 14.23433321  | 0.48112666  | -0.72040975 |
| 459 | C | 15.22473246  | -1.25259453 | 0.11032012  |
| 460 | H | 15.14373686  | -1.86484426 | -0.80044361 |
| 461 | H | 15.08955482  | -1.94527067 | 0.95461285  |
| 462 | C | 16.62884428  | -0.63854945 | 0.18184824  |
| 463 | H | 16.70984597  | -0.02640562 | 1.09147650  |
| 464 | H | 16.76478881  | 0.05227942  | -0.66252784 |
| 465 | S | -0.00000002  | -0.77125293 | -0.20301612 |
| 466 | C | 17.74810507  | -1.68492171 | 0.17003676  |
| 467 | H | 17.71426080  | -2.29059304 | -0.74418072 |
| 468 | H | 18.73699733  | -1.21476990 | 0.22174887  |
| 469 | H | 17.65926346  | -2.36929533 | 1.02298639  |
| 470 | C | -17.74809840 | -1.68493049 | 0.17019756  |
| 471 | H | -18.73699188 | -1.21477756 | 0.22187505  |
| 472 | H | -17.71426122 | -2.29068893 | -0.74396246 |
| 473 | H | -17.65924526 | -2.36922236 | 1.02321157  |

474 **Optimized coordinates (Å) for Th<sub>3</sub>(10):**

|     |   |             |             |             |
|-----|---|-------------|-------------|-------------|
| 475 | C | 1.26837879  | -1.21007656 | 0.00008198  |
| 476 | C | 0.70852443  | -2.47104433 | 0.00033753  |
| 477 | C | -0.70852454 | -2.47104417 | 0.00033264  |
| 478 | C | -1.26837862 | -1.21007627 | 0.00007325  |
| 479 | S | 0.00000022  | 0.01108963  | -0.00024612 |
| 480 | H | 1.30156813  | -3.37954852 | 0.00055460  |
| 481 | H | -1.30156847 | -3.37954821 | 0.00053860  |
| 482 | C | 2.66280229  | -0.82805285 | 0.00003919  |
| 483 | C | 3.22398045  | 0.42972758  | -0.00007935 |
| 484 | S | 3.93527594  | -2.04662194 | 0.00014213  |

|     |   |              |             |             |
|-----|---|--------------|-------------|-------------|
| 485 | C | 4.64875931   | 0.42350348  | -0.00008727 |
| 486 | H | 2.63410326   | 1.34072849  | -0.00015208 |
| 487 | C | 5.20090459   | -0.83106076 | 0.00002478  |
| 488 | H | 5.24307275   | 1.33020577  | -0.00017238 |
| 489 | C | -2.66280200  | -0.82805223 | 0.00002622  |
| 490 | C | -3.22397990  | 0.42972830  | -0.00029443 |
| 491 | S | -3.93527604  | -2.04662098 | 0.00043851  |
| 492 | C | -4.64875882  | 0.42350458  | -0.00026313 |
| 493 | H | -2.63410247  | 1.34072902  | -0.00056956 |
| 494 | C | -5.20090450  | -0.83105947 | 0.00007857  |
| 495 | H | -5.24307197  | 1.33020702  | -0.00051052 |
| 496 | C | 6.64764594   | -1.25032333 | 0.00005105  |
| 497 | H | 6.84287393   | -1.88653100 | 0.87558288  |
| 498 | H | 6.84287901   | -1.88662508 | -0.87541167 |
| 499 | C | -6.64764594  | -1.25032175 | 0.00018201  |
| 500 | H | -6.84289086  | -1.88674621 | -0.87518910 |
| 501 | H | -6.84286218  | -1.88640668 | 0.87580539  |
| 502 | C | 7.63992573   | -0.07865094 | -0.00001001 |
| 503 | H | 7.45912084   | 0.55298895  | -0.88027122 |
| 504 | H | 7.45910740   | 0.55309150  | 0.88017475  |
| 505 | C | -7.63992573  | -0.07864935 | -0.00002881 |
| 506 | H | -7.45909269  | 0.55321695  | 0.88006408  |
| 507 | H | -7.45913566  | 0.55286667  | -0.88038190 |
| 508 | C | -9.10082769  | -0.54674119 | 0.00009762  |
| 509 | H | -9.27876687  | -1.18346403 | -0.87896767 |
| 510 | H | -9.27872242  | -1.18312624 | 0.87941647  |
| 511 | C | 9.10082774   | -0.54674268 | 0.00002772  |
| 512 | H | 9.27873888   | -1.18324276 | 0.87925998  |
| 513 | H | 9.27875073   | -1.18335047 | -0.87912420 |
| 514 | C | 10.10788798  | 0.61059592  | -0.00003658 |
| 515 | H | 9.92872375   | 1.24731056  | -0.87907160 |
| 516 | H | 9.92870528   | 1.24742444  | 0.87891218  |
| 517 | C | -10.10788803 | 0.61059728  | -0.00009860 |
| 518 | H | -9.92873544  | 1.24720246  | -0.87921525 |
| 519 | H | -9.92869396  | 1.24753527  | 0.87876850  |
| 520 | C | -11.57042912 | 0.14715030  | 0.00002368  |
| 521 | H | -11.74885435 | -0.49003806 | 0.87900680  |
| 522 | H | -11.74889954 | -0.49036015 | -0.87871669 |
| 523 | C | 11.57042906  | 0.14714916  | 0.00000916  |
| 524 | H | 11.74886742  | -0.49014292 | 0.87891440  |
| 525 | H | 11.74888663  | -0.49025751 | -0.87880911 |
| 526 | C | 12.57923310  | 1.30306212  | -0.00005519 |
| 527 | H | 12.40049099  | 1.94038510  | -0.87892945 |
| 528 | H | 12.40046707  | 1.94050387  | 0.87872807  |
| 529 | C | -12.57923331 | 1.30306307  | -0.00016181 |
| 530 | H | -12.40050068 | 1.94028629  | -0.87911035 |
| 531 | H | -12.40045802 | 1.94060463  | 0.87854715  |
| 532 | C | -14.04195172 | 0.84012335  | -0.00004244 |
| 533 | H | -14.22049793 | 0.20274951  | 0.87889690  |
| 534 | H | -14.22054301 | 0.20243838  | -0.87874691 |
| 535 | C | -15.05135891 | 1.99530071  | -0.00022078 |
| 536 | H | -14.87386773 | 2.63313839  | -0.87918136 |

|     |   |              |            |             |
|-----|---|--------------|------------|-------------|
| 537 | H | -14.87382402 | 2.63344742 | 0.87850664  |
| 538 | C | -16.51415231 | 1.53281315 | -0.00010308 |
| 539 | H | -16.69196820 | 0.89604880 | 0.87832949  |
| 540 | H | -16.69201296 | 0.89574338 | -0.87830512 |
| 541 | C | 14.04195156  | 0.84012266 | -0.00000369 |
| 542 | H | 14.22053285  | 0.20253421 | -0.87878026 |
| 543 | H | 14.22050803  | 0.20265236 | 0.87886359  |
| 544 | C | 15.05135854  | 1.99530022 | -0.00006701 |
| 545 | H | 14.87385921  | 2.63323209 | -0.87895759 |
| 546 | H | 14.87383159  | 2.63335269 | 0.87873044  |
| 547 | C | 16.51415205  | 1.53281294 | -0.00001206 |
| 548 | H | 16.69200450  | 0.89583600 | -0.87828311 |
| 549 | H | 16.69197640  | 0.89595580 | 0.87835153  |
| 550 | C | 17.51529582  | 2.69276663 | -0.00007501 |
| 551 | H | 17.38491046  | 3.32826236 | 0.88475111  |
| 552 | H | 18.54962514  | 2.32973201 | -0.00003320 |
| 553 | H | 17.38493935  | 3.32814112 | -0.88499243 |
| 554 | C | -17.51529629 | 2.69276667 | -0.00027913 |
| 555 | H | -17.38494750 | 3.32804847 | -0.88526422 |
| 556 | H | -18.54962551 | 2.32973186 | -0.00019049 |
| 557 | H | -17.38490347 | 3.32835509 | 0.88447929  |

#### 558 TD-DFT excitation energies and oscillator strengths for Th-Oxd-Th(10):

|     |                                                                                   |           |                                               |  |
|-----|-----------------------------------------------------------------------------------|-----------|-----------------------------------------------|--|
| 559 | Excited State 1: Singlet-A 3.8397 eV 322.90 nm f = 1.1612 <S**2> = 0.000          |           |                                               |  |
| 560 | 139 ->142                                                                         | 0.16639   |                                               |  |
| 561 | 140 ->141                                                                         | 0.67844   |                                               |  |
| 562 | This state for optimization and/or second-order correction.                       |           |                                               |  |
| 563 | Total Energy, E(TD-HF/TD-DFT) = -2151.57241331                                    |           |                                               |  |
| 564 | Copying the excited state density for this state as the 1-particle RhoCI density. |           |                                               |  |
| 565 | Excited State 2:                                                                  | Singlet-A | 4.7066 eV 263.42 nm f = 0.0585 <S**2> = 0.000 |  |
| 566 | 138 ->141                                                                         | 0.10602   |                                               |  |
| 567 | 139 ->141                                                                         | 0.39208   |                                               |  |
| 568 | 140 ->142                                                                         | 0.56073   |                                               |  |
| 569 | Excited State 3:                                                                  | Singlet-A | 5.1694 eV 239.84 nm f = 0.0007 <S**2> = 0.000 |  |
| 570 | 137 ->141                                                                         | 0.58692   |                                               |  |
| 571 | 138 ->142                                                                         | -0.35150  |                                               |  |
| 572 | Excited State 4:                                                                  | Singlet-A | 5.1769 eV 239.50 nm f = 0.1757 <S**2> = 0.000 |  |
| 573 | 137 ->142                                                                         | -0.34830  |                                               |  |
| 574 | 138 ->141                                                                         | 0.57678   |                                               |  |
| 575 | 139 ->141                                                                         | -0.12485  |                                               |  |
| 576 | Excited State 5:                                                                  | Singlet-A | 5.3774 eV 230.57 nm f = 0.0001 <S**2>=0.000   |  |
| 577 | 133 ->142                                                                         | 0.12674   |                                               |  |
| 578 | 139 ->141                                                                         | 0.55159   |                                               |  |
| 579 | 140 ->142                                                                         | -0.40040  |                                               |  |
| 580 | Excited State 6:                                                                  | Singlet-A | 5.6984 eV 217.58 nm f=0.0000 <S**2> = 0.000   |  |
| 581 | 134 ->141                                                                         | 0.64152   |                                               |  |
| 582 | 134 ->145                                                                         | -0.14015  |                                               |  |
| 583 | 136 ->141                                                                         | 0.20251   |                                               |  |
| 584 | Excited State 7:                                                                  | Singlet-A | 5.9211 eV 209.39 nm f = 0.0347 <S**2> = 0.000 |  |
| 585 | 133 ->141                                                                         | 0.21742   |                                               |  |
| 586 | 139 ->142                                                                         | 0.61505   |                                               |  |
| 587 | 140 ->141                                                                         | -0.13869  |                                               |  |

|     |                   |           |                                               |
|-----|-------------------|-----------|-----------------------------------------------|
| 588 | 140 ->145         | 0.17856   |                                               |
| 589 | Excited State 8:  | Singlet-A | 5.9270 eV 209.19 nm f = 0.0000 <S**2> = 0.000 |
| 590 | 139 ->144         | 0.33420   |                                               |
| 591 | 140 ->143         | 0.59840   |                                               |
| 592 | Excited State 9:  | Singlet-A | 5.9946 eV 206.83 nm f = 0.0008 <S**2> = 0.000 |
| 593 | 139 ->143         | 0.37585   |                                               |
| 594 | 140 ->144         | 0.56656   |                                               |
| 595 | Excited State 10: | Singlet-A | 6.2904 eV 197.10 nm f = 0.0067 <S**2>=0.000   |
| 596 | 116 ->141         | -0.10331  |                                               |
| 597 | 118 ->141         | -0.21384  |                                               |
| 598 | 122 ->141         | -0.17124  |                                               |
| 599 | 134 ->142         | 0.54317   |                                               |
| 600 | 134 ->150         | 0.16147   |                                               |
| 601 | 134 ->167         | -0.12540  |                                               |
| 602 | 136 ->142         | 0.17894   |                                               |
| 603 | Excited State 11: | Singlet-A | 6.3596 eV 194.96 nm f = 0.0000 <S**2> = 0.000 |
| 604 | 137 ->143         | 0.48569   |                                               |
| 605 | 138 ->144         | -0.45662  |                                               |
| 606 | Excited State 12: | Singlet-A | 6.3618 eV 194.89 nm f = 0.0000 <S**2> = 0.000 |
| 607 | 134 ->142         | -0.10948  |                                               |
| 608 | 137 ->144         | -0.45141  |                                               |
| 609 | 138 ->143         | 0.47057   |                                               |
| 610 | Excited State 13: | Singlet-A | 6.5740 eV 188.60 nm = 0.0144 <S**2> = 0.000   |
| 611 | 133 ->141         | -0.16914  |                                               |
| 612 | 137 ->141         | -0.30996  |                                               |
| 613 | 137 ->145         | 0.15244   |                                               |
| 614 | 138 ->142         | -0.34737  |                                               |
| 615 | 139 ->150         | -0.18597  |                                               |
| 616 | 140 ->145         | 0.42003   |                                               |
| 617 | Excited State 14: | Singlet-A | 6.6269 eV 187.09 nm f=0.0002 <S**2>=0.000     |
| 618 | 137 ->142         | 0.50133   |                                               |
| 619 | 138 ->141         | 0.37664   |                                               |
| 620 | 138 ->145         | -0.15985  |                                               |
| 621 | 139 ->145         | 0.15232   |                                               |
| 622 | 140 ->150         | -0.19883  |                                               |
| 623 | Excited State 15: | Singlet-A | 6.7394 eV 183.97 nm f=0.0251 <S**2>=0.000     |
| 624 | 137 ->141         | 0.20498   |                                               |
| 625 | 137 ->145         | -0.10627  |                                               |
| 626 | 138 ->142         | 0.43762   |                                               |
| 627 | 139 ->142         | -0.13396  |                                               |
| 628 | 139 ->150         | -0.14540  |                                               |
| 629 | 140 ->145         | 0.44440   |                                               |
| 630 | Excited State 16: | Singlet-A | 6.8924 eV 179.88 nm f=0.0019 <S**2>=0.000     |
| 631 | 115 ->142         | 0.11594   |                                               |
| 632 | 116 ->141         | 0.18119   |                                               |
| 633 | 118 ->141         | 0.40486   |                                               |
| 634 | 122 ->141         | 0.36915   |                                               |
| 635 | 134 ->142         | 0.28832   |                                               |
| 636 | 135 ->141         | -0.10094  |                                               |
| 637 | Excited State 17: | Singlet-A | 6.9960 eV 177.22 nm f = 0.3755 S**2>=0.000    |
| 638 | 113 ->141         | -0.14081  |                                               |
| 639 | 137 ->142         | 0.28490   |                                               |

|     |                   |           |           |           |          |              |  |
|-----|-------------------|-----------|-----------|-----------|----------|--------------|--|
| 640 | 139 ->145         | -0.28752  |           |           |          |              |  |
| 641 | 140 ->150         | 0.52557   |           |           |          |              |  |
| 642 | Excited State 18: | Singlet-A | 7.0016 eV | 177.08 nm | f=0.0091 | <S**2>=0.000 |  |
| 643 | 133 ->141         | 0.60542   |           |           |          |              |  |
| 644 | 138 ->142         | -0.11100  |           |           |          |              |  |
| 645 | 139 ->142         | -0.23165  |           |           |          |              |  |
| 646 | 140 ->141         | 0.10649   |           |           |          |              |  |
| 647 | Excited State 19: | Singlet-A | 7.0156 eV | 176.73 nm | f=0.0000 | <S**2>=0.000 |  |
| 648 | 110 ->142         | 0.10494   |           |           |          |              |  |
| 649 | 112 ->141         | -0.10370  |           |           |          |              |  |
| 650 | 114 ->142         | 0.20899   |           |           |          |              |  |
| 651 | 115 ->141         | 0.36301   |           |           |          |              |  |
| 652 | 117 ->141         | 0.10405   |           |           |          |              |  |
| 653 | 121 ->141         | 0.31625   |           |           |          |              |  |
| 654 | 122 ->142         | 0.28720   |           |           |          |              |  |
| 655 | 135 ->142         | -0.14145  |           |           |          |              |  |
| 656 | 136 ->141         | -0.21074  |           |           |          |              |  |
| 657 | Excited State 20: | Singlet-A | 7.0690 eV | 175.39 nm | f=0.0085 | <S**2>=0.000 |  |
| 658 | 110 ->141         | 0.17679   |           |           |          |              |  |
| 659 | 114 ->141         | 0.37381   |           |           |          |              |  |
| 660 | 115 ->142         | 0.24180   |           |           |          |              |  |
| 661 | 116 ->141         | -0.19952  |           |           |          |              |  |
| 662 | 118 ->141         | -0.19438  |           |           |          |              |  |
| 663 | 121 ->142         | 0.21296   |           |           |          |              |  |
| 664 | 122 ->141         | 0.18842   |           |           |          |              |  |
| 665 | 122 ->145         | 0.10014   |           |           |          |              |  |
| 666 | 135 ->141         | -0.21212  |           |           |          |              |  |
| 667 | 136 ->142         | -0.14511  |           |           |          |              |  |
| 668 | Excited State 21: | Singlet-A | 7.0864 eV | 174.96 nm | f=0.0000 | <S**2>=0.000 |  |
| 669 | 139 ->144         | -0.16326  |           |           |          |              |  |
| 670 | 140 ->147         | -0.13963  |           |           |          |              |  |
| 671 | 140 ->149         | 0.13149   |           |           |          |              |  |
| 672 | 140 ->152         | -0.21062  |           |           |          |              |  |
| 673 | 140 ->153         | 0.29669   |           |           |          |              |  |
| 674 | 140 ->154         | 0.32012   |           |           |          |              |  |
| 675 | 140 ->159         | -0.27770  |           |           |          |              |  |
| 676 | 140 ->162         | -0.23557  |           |           |          |              |  |
| 677 | Excited State 22: | Singlet-A | 7.3232 eV | 169.30 nm | f=0.0000 | <S**2>=0.000 |  |
| 678 | 139 ->147         | -0.18742  |           |           |          |              |  |
| 679 | 139 ->149         | 0.16438   |           |           |          |              |  |
| 680 | 139 ->152         | -0.14061  |           |           |          |              |  |
| 681 | 140 ->144         | -0.12821  |           |           |          |              |  |
| 682 | 140 ->146         | 0.34304   |           |           |          |              |  |
| 683 | 140 ->148         | -0.28060  |           |           |          |              |  |
| 684 | 140 ->151         | 0.21270   |           |           |          |              |  |
| 685 | 140 ->161         | -0.16377  |           |           |          |              |  |
| 686 | 140 ->163         | 0.13354   |           |           |          |              |  |
| 687 | 140 ->169         | -0.11490  |           |           |          |              |  |
| 688 | 140 ->170         | 0.15360   |           |           |          |              |  |
| 689 | Excited State 23: | Singlet-A | 7.4056 eV | 167.42 nm | f=0.0000 | <S**2>=0.000 |  |
| 690 | 139 ->144         | 0.14018   |           |           |          |              |  |
| 691 | 139 ->158         | 0.11313   |           |           |          |              |  |



|     |                   |           |           |           |          |              |  |
|-----|-------------------|-----------|-----------|-----------|----------|--------------|--|
| 692 | 139 ->163         | -0.19155  |           |           |          |              |  |
| 693 | 140 ->153         | 0.50296   |           |           |          |              |  |
| 694 | 140 ->159         | 0.18105   |           |           |          |              |  |
| 695 | 140 ->162         | 0.22337   |           |           |          |              |  |
| 696 | 140 ->168         | 0.12670   |           |           |          |              |  |
| 697 | Excited State 24: | Singlet-A | 7.4385 eV | 166.68 nm | f=0.0000 | <S**2>=0.000 |  |
| 698 | 136 ->141         | 0.11977   |           |           |          |              |  |
| 699 | 139 ->146         | -0.19282  |           |           |          |              |  |
| 700 | 139 ->148         | 0.16348   |           |           |          |              |  |
| 701 | 139 ->151         | -0.13568  |           |           |          |              |  |
| 702 | 140 ->147         | 0.33618   |           |           |          |              |  |
| 703 | 140 ->149         | -0.26475  |           |           |          |              |  |
| 704 | 140 ->152         | 0.16583   |           |           |          |              |  |
| 705 | 140 ->153         | 0.11341   |           |           |          |              |  |
| 706 | 140 ->154         | 0.10884   |           |           |          |              |  |
| 707 | 140 ->159         | -0.11322  |           |           |          |              |  |
| 708 | 140 ->160         | -0.15120  |           |           |          |              |  |
| 709 | 140 ->162         | -0.14973  |           |           |          |              |  |
| 710 | 140 ->168         | -0.11390  |           |           |          |              |  |
| 711 | Excited State 25: | Singlet-A | 7.4553 eV | 166.30 nm | f=0.0009 | <S**2>=0.000 |  |
| 712 | 139 ->143         | 0.16129   |           |           |          |              |  |
| 713 | 139 ->153         | -0.11429  |           |           |          |              |  |
| 714 | 139 ->154         | 0.10306   |           |           |          |              |  |
| 715 | 139 ->159         | -0.15927  |           |           |          |              |  |
| 716 | 139 ->162         | -0.17987  |           |           |          |              |  |
| 717 | 139 ->168         | -0.11816  |           |           |          |              |  |
| 718 | 140 ->146         | -0.15137  |           |           |          |              |  |
| 719 | 140 ->148         | 0.12997   |           |           |          |              |  |
| 720 | 140 ->151         | -0.13059  |           |           |          |              |  |
| 721 | 140 ->155         | 0.15112   |           |           |          |              |  |
| 722 | 140 ->158         | -0.26395  |           |           |          |              |  |
| 723 | 140 ->163         | 0.37400   |           |           |          |              |  |
| 724 | 140 ->170         | 0.15430   |           |           |          |              |  |
| 725 | Excited State 26: | Singlet-A | 7.5037 eV | 165.23 nm | f=0.0000 | <S**2>=0.000 |  |
| 726 | 104 ->142         | -0.13497  |           |           |          |              |  |
| 727 | 105 ->141         | 0.13491   |           |           |          |              |  |
| 728 | 107 ->141         | 0.17020   |           |           |          |              |  |
| 729 | 110 ->142         | 0.14865   |           |           |          |              |  |
| 730 | 112 ->141         | -0.20770  |           |           |          |              |  |
| 731 | 114 ->142         | 0.13178   |           |           |          |              |  |
| 732 | 115 ->141         | 0.29385   |           |           |          |              |  |
| 733 | 121 ->141         | -0.12739  |           |           |          |              |  |
| 734 | 134 ->141         | -0.11645  |           |           |          |              |  |
| 735 | 135 ->142         | 0.15633   |           |           |          |              |  |
| 736 | 136 ->141         | 0.33751   |           |           |          |              |  |
| 737 | 140 ->147         | -0.12163  |           |           |          |              |  |
| 738 | 140 ->153         | -0.11847  |           |           |          |              |  |
| 739 | Excited State 27: | Singlet-A | 7.5451 eV | 164.32 nm | f=0.0224 | <S**2>=0.000 |  |
| 740 | 108 ->141         | -0.13687  |           |           |          |              |  |
| 741 | 111 ->141         | 0.18370   |           |           |          |              |  |
| 742 | 113 ->141         | 0.16512   |           |           |          |              |  |
| 743 | 133 ->142         | 0.44961   |           |           |          |              |  |

|     |                   |           |           |           |          |              |  |
|-----|-------------------|-----------|-----------|-----------|----------|--------------|--|
| 744 | 137 ->150         | 0.21846   |           |           |          |              |  |
| 745 | 138 ->145         | 0.23926   |           |           |          |              |  |
| 746 | 139 ->141         | -0.10379  |           |           |          |              |  |
| 747 | 140 ->167         | 0.18617   |           |           |          |              |  |
| 748 | Excited State 28: | Singlet-A | 7.5572 eV | 164.06 nm | f=0.0000 | <S**2>=0.000 |  |
| 749 | 114 ->142         | -0.21459  |           |           |          |              |  |
| 750 | 116 ->142         | 0.25632   |           |           |          |              |  |
| 751 | 118 ->142         | 0.45963   |           |           |          |              |  |
| 752 | 118 ->150         | 0.13839   |           |           |          |              |  |
| 753 | 118 ->167         | -0.10476  |           |           |          |              |  |
| 754 | 122 ->142         | 0.25208   |           |           |          |              |  |
| 755 | Excited State 29: | Singlet-A | 7.5636 eV | 163.92 nm | f=0.0011 | <S**2>=0.000 |  |
| 756 | 104 ->141         | -0.20068  |           |           |          |              |  |
| 757 | 105 ->142         | 0.10349   |           |           |          |              |  |
| 758 | 107 ->142         | 0.12348   |           |           |          |              |  |
| 759 | 110 ->141         | 0.24180   |           |           |          |              |  |
| 760 | 112 ->142         | -0.15071  |           |           |          |              |  |
| 761 | 114 ->141         | 0.23230   |           |           |          |              |  |
| 762 | 115 ->142         | 0.21505   |           |           |          |              |  |
| 763 | 118 ->141         | 0.11659   |           |           |          |              |  |
| 764 | 135 ->141         | 0.37713   |           |           |          |              |  |
| 765 | 136 ->142         | 0.17981   |           |           |          |              |  |
| 766 | Excited State 30: | Singlet-A | 7.6332 eV | 162.43 nm | f=0.2315 | <S**2>=0.000 |  |
| 767 | 137 ->145         | 0.46672   |           |           |          |              |  |
| 768 | 138 ->142         | 0.18205   |           |           |          |              |  |
| 769 | 138 ->150         | 0.40275   |           |           |          |              |  |
| 770 | 139 ->150         | -0.12803  |           |           |          |              |  |
| 771 | 140 ->166         | -0.13622  |           |           |          |              |  |

## 772 TD-DFT excitation energies and oscillator strengths for Th-Thd-Th(10):

|     |                                                                                   |           |           |           |          |              |  |
|-----|-----------------------------------------------------------------------------------|-----------|-----------|-----------|----------|--------------|--|
| 773 | Excited State 1:                                                                  | Singlet-A | 3.5070 eV | 353.53 nm | f=1.1804 | <S**2>=0.000 |  |
| 774 | 143 ->146                                                                         | 0.13462   |           |           |          |              |  |
| 775 | 144 ->145                                                                         | 0.68560   |           |           |          |              |  |
| 776 | This state for optimization and/or second-order correction.                       |           |           |           |          |              |  |
| 777 | Total Energy, E(TD-HF/TD-DFT) = -2474.55713381                                    |           |           |           |          |              |  |
| 778 | Copying the excited state density for this state as the 1-particle RhoCI density. |           |           |           |          |              |  |
| 779 | Excited State 2:                                                                  | Singlet-A | 4.4743 eV | 277.10 nm | f=0.0001 | <S**2>=0.000 |  |
| 780 | 143 ->145                                                                         | 0.54962   |           |           |          |              |  |
| 781 | 144 ->146                                                                         | 0.41215   |           |           |          |              |  |
| 782 | Excited State 3:                                                                  | Singlet-A | 4.7187 eV | 262.75 nm | f=0.0000 | <S**2>=0.000 |  |
| 783 | 140 ->145                                                                         | 0.68229   |           |           |          |              |  |
| 784 | 140 ->148                                                                         | 0.13663   |           |           |          |              |  |
| 785 | Excited State 4:                                                                  | Singlet-A | 4.9413 eV | 250.92 nm | f=0.0964 | <S**2>=0.000 |  |
| 786 | 141 ->146                                                                         | -0.27999  |           |           |          |              |  |
| 787 | 142 ->145                                                                         | 0.60751   |           |           |          |              |  |
| 788 | 143 ->145                                                                         | 0.16448   |           |           |          |              |  |
| 789 | Excited State 5:                                                                  | Singlet-A | 4.9658 eV | 249.67 nm | f=0.0061 | <S**2>=0.000 |  |
| 790 | 141 ->145                                                                         | 0.62700   |           |           |          |              |  |
| 791 | 142 ->146                                                                         | -0.28821  |           |           |          |              |  |
| 792 | Excited State 6:                                                                  | Singlet-A | 5.1295 eV | 241.71 nm | f=0.0139 | <S**2>=0.000 |  |
| 793 | 142 ->145                                                                         | 0.14946   |           |           |          |              |  |
| 794 | 143 ->145                                                                         | -0.38413  |           |           |          |              |  |

|     |               |          |           |           |           |          |              |
|-----|---------------|----------|-----------|-----------|-----------|----------|--------------|
| 795 | 143 ->148     | -0.12713 |           |           |           |          |              |
| 796 | 144 ->146     | 0.53809  |           |           |           |          |              |
| 797 | Excited State | 7:       | Singlet-A | 5.3658 eV | 231.06 nm | f=0.0006 | <S**2>=0.000 |
| 798 | 136 ->147     | -0.13272 |           |           |           |          |              |
| 799 | 144 ->147     | 0.67553  |           |           |           |          |              |
| 800 | Excited State | 8:       | Singlet-A | 5.6407 eV | 219.80 nm | f=0.0013 | <S**2>=0.000 |
| 801 | 133 ->145     | 0.52447  |           |           |           |          |              |
| 802 | 140 ->146     | -0.40254 |           |           |           |          |              |
| 803 | 140 ->155     | -0.12979 |           |           |           |          |              |
| 804 | 144 ->147     | -0.10696 |           |           |           |          |              |
| 805 | Excited State | 9:       | Singlet-A | 5.7387 eV | 216.05 nm | f=0.1112 | <S**2>=0.000 |
| 806 | 136 ->145     | 0.21706  |           |           |           |          |              |
| 807 | 143 ->146     | 0.58147  |           |           |           |          |              |
| 808 | 144 ->148     | -0.28253 |           |           |           |          |              |
| 809 | Excited State | 10:      | Singlet-A | 5.8126 eV | 213.30 nm | f=0.0303 | <S**2>=0.000 |
| 810 | 136 ->146     | -0.10062 |           |           |           |          |              |
| 811 | 137 ->145     | 0.64223  |           |           |           |          |              |
| 812 | 140 ->147     | 0.16350  |           |           |           |          |              |
| 813 | Excited State | 11:      | Singlet-A | 5.8558 eV | 211.73 nm | f=0.0002 | <S**2>=0.000 |
| 814 | 143 ->147     | -0.18070 |           |           |           |          |              |
| 815 | 143 ->150     | 0.26175  |           |           |           |          |              |
| 816 | 144 ->149     | 0.59726  |           |           |           |          |              |
| 817 | Excited State | 12:      | Singlet-A | 6.0214 eV | 205.91 nm | f=0.0011 | <S**2>=0.000 |
| 818 | 133 ->145     | -0.14580 |           |           |           |          |              |
| 819 | 140 ->146     | -0.11898 |           |           |           |          |              |
| 820 | 143 ->149     | 0.36392  |           |           |           |          |              |
| 821 | 144 ->150     | 0.50896  |           |           |           |          |              |
| 822 | 144 ->152     | -0.15647 |           |           |           |          |              |
| 823 | Excited State | 13:      | Singlet-A | 6.1099 eV | 202.92 nm | f=0.0038 | <S**2>=0.000 |
| 824 | 133 ->145     | 0.39510  |           |           |           |          |              |
| 825 | 140 ->146     | 0.49361  |           |           |           |          |              |
| 826 | 140 ->155     | 0.14768  |           |           |           |          |              |
| 827 | 143 ->149     | 0.10918  |           |           |           |          |              |
| 828 | 144 ->150     | 0.14781  |           |           |           |          |              |
| 829 | Excited State | 14:      | Singlet-A | 6.1768 eV | 200.73 nm | f=0.0000 | <S**2>=0.000 |
| 830 | 137 ->147     | 0.38238  |           |           |           |          |              |
| 831 | 142 ->147     | 0.10202  |           |           |           |          |              |
| 832 | 143 ->147     | 0.53709  |           |           |           |          |              |
| 833 | 143 ->150     | 0.10905  |           |           |           |          |              |
| 834 | 144 ->149     | 0.13514  |           |           |           |          |              |
| 835 | Excited State | 15:      | Singlet-A | 6.3335 eV | 195.76 nm | f=0.0067 | <S**2>=0.000 |
| 836 | 136 ->145     | 0.30318  |           |           |           |          |              |
| 837 | 141 ->145     | -0.20038 |           |           |           |          |              |
| 838 | 141 ->148     | -0.16839 |           |           |           |          |              |
| 839 | 142 ->146     | -0.28521 |           |           |           |          |              |
| 840 | 143 ->155     | 0.18149  |           |           |           |          |              |
| 841 | 144 ->148     | 0.43790  |           |           |           |          |              |
| 842 | Excited State | 16:      | Singlet-A | 6.3823 eV | 194.26 nm | f=0.0002 | <S**2>=0.000 |
| 843 | 141 ->147     | 0.15331  |           |           |           |          |              |
| 844 | 141 ->150     | -0.40636 |           |           |           |          |              |
| 845 | 141 ->152     | 0.12986  |           |           |           |          |              |
| 846 | 142 ->149     | 0.47299  |           |           |           |          |              |

|     |               |     |           |           |           |          |                                  |
|-----|---------------|-----|-----------|-----------|-----------|----------|----------------------------------|
| 847 | Excited State | 17: | Singlet-A | 6.3871 eV | 194.12 nm | f=0.0000 | $\langle S^{*2} \rangle = 0.000$ |
| 848 | 141 ->149     |     | 0.47975   |           |           |          |                                  |
| 849 | 142 ->147     |     | 0.13512   |           |           |          |                                  |
| 850 | 142 ->150     |     | -0.39778  |           |           |          |                                  |
| 851 | 142 ->152     |     | 0.12746   |           |           |          |                                  |
| 852 | 143 ->150     |     | -0.10594  |           |           |          |                                  |
| 853 | Excited State | 18: | Singlet-A | 6.4570 eV | 192.01 nm | f=0.0031 | $\langle S^{*2} \rangle = 0.000$ |
| 854 | 137 ->145     |     | -0.10085  |           |           |          |                                  |
| 855 | 141 ->146     |     | 0.50008   |           |           |          |                                  |
| 856 | 142 ->145     |     | 0.30150   |           |           |          |                                  |
| 857 | 142 ->148     |     | 0.21920   |           |           |          |                                  |
| 858 | 143 ->148     |     | 0.17744   |           |           |          |                                  |
| 859 | 144 ->155     |     | 0.19138   |           |           |          |                                  |
| 860 | Excited State | 19: | Singlet-A | 6.5242 eV | 190.04 nm | f=0.0757 | $\langle S^{*2} \rangle = 0.000$ |
| 861 | 141 ->145     |     | 0.20347   |           |           |          |                                  |
| 862 | 141 ->148     |     | 0.17401   |           |           |          |                                  |
| 863 | 142 ->146     |     | 0.44590   |           |           |          |                                  |
| 864 | 143 ->146     |     | 0.20349   |           |           |          |                                  |
| 865 | 144 ->148     |     | 0.37967   |           |           |          |                                  |
| 866 | Excited State | 20: | Singlet-A | 6.6944 eV | 185.21 nm | f=0.0010 | $\langle S^{*2} \rangle = 0.000$ |
| 867 | 136 ->145     |     | 0.55620   |           |           |          |                                  |
| 868 | 137 ->146     |     | -0.11522  |           |           |          |                                  |
| 869 | 141 ->145     |     | 0.10055   |           |           |          |                                  |
| 870 | 142 ->146     |     | 0.20532   |           |           |          |                                  |
| 871 | 143 ->146     |     | -0.24397  |           |           |          |                                  |
| 872 | 144 ->145     |     | 0.11098   |           |           |          |                                  |
| 873 | 144 ->148     |     | -0.10053  |           |           |          |                                  |
| 874 | Excited State | 21: | Singlet-A | 6.8314 eV | 181.49 nm | f=0.2001 | $\langle S^{*2} \rangle = 0.000$ |
| 875 | 140 ->147     |     | -0.27549  |           |           |          |                                  |
| 876 | 141 ->146     |     | -0.26409  |           |           |          |                                  |
| 877 | 143 ->148     |     | 0.29197   |           |           |          |                                  |
| 878 | 144 ->153     |     | -0.12434  |           |           |          |                                  |
| 879 | 144 ->155     |     | 0.43394   |           |           |          |                                  |
| 880 | Excited State | 22: | Singlet-A | 6.8374 eV | 181.33 nm | f=0.0000 | $\langle S^{*2} \rangle = 0.000$ |
| 881 | 117 ->146     |     | -0.15989  |           |           |          |                                  |
| 882 | 118 ->145     |     | 0.37991   |           |           |          |                                  |
| 883 | 123 ->146     |     | 0.13395   |           |           |          |                                  |
| 884 | 124 ->145     |     | 0.27591   |           |           |          |                                  |
| 885 | 133 ->146     |     | 0.36296   |           |           |          |                                  |
| 886 | 139 ->145     |     | -0.17930  |           |           |          |                                  |
| 887 | Excited State | 23: | Singlet-A | 6.9028 eV | 179.61 nm | f=0.0064 | $\langle S^{*2} \rangle = 0.000$ |
| 888 | 114 ->145     |     | -0.14222  |           |           |          |                                  |
| 889 | 117 ->145     |     | -0.33787  |           |           |          |                                  |
| 890 | 118 ->146     |     | 0.23649   |           |           |          |                                  |
| 891 | 119 ->145     |     | 0.12307   |           |           |          |                                  |
| 892 | 123 ->145     |     | 0.34030   |           |           |          |                                  |
| 893 | 124 ->146     |     | 0.21139   |           |           |          |                                  |
| 894 | 138 ->145     |     | -0.26525  |           |           |          |                                  |
| 895 | 139 ->146     |     | -0.12211  |           |           |          |                                  |
| 896 | Excited State | 24: | Singlet-A | 6.9601 eV | 178.14 nm | f=0.0000 | $\langle S^{*2} \rangle = 0.000$ |
| 897 | 137 ->147     |     | -0.12830  |           |           |          |                                  |
| 898 | 143 ->150     |     | 0.22079   |           |           |          |                                  |

|     |                   |           |           |           |          |              |  |
|-----|-------------------|-----------|-----------|-----------|----------|--------------|--|
| 899 | 143 ->178         | -0.11140  |           |           |          |              |  |
| 900 | 144 ->156         | 0.14121   |           |           |          |              |  |
| 901 | 144 ->158         | 0.47414   |           |           |          |              |  |
| 902 | 144 ->163         | -0.18195  |           |           |          |              |  |
| 903 | 144 ->169         | 0.20726   |           |           |          |              |  |
| 904 | Excited State 25: | Singlet-A | 7.0702 eV | 175.36 nm | f=0.0000 | <S**2>=0.000 |  |
| 905 | 111 ->145         | -0.13921  |           |           |          |              |  |
| 906 | 117 ->146         | 0.10414   |           |           |          |              |  |
| 907 | 123 ->146         | -0.17663  |           |           |          |              |  |
| 908 | 124 ->145         | -0.21380  |           |           |          |              |  |
| 909 | 133 ->146         | 0.44611   |           |           |          |              |  |
| 910 | 133 ->155         | 0.15483   |           |           |          |              |  |
| 911 | 139 ->145         | 0.27099   |           |           |          |              |  |
| 912 | 144 ->158         | -0.12091  |           |           |          |              |  |
| 913 | Excited State 26: | Singlet-A | 7.1966 eV | 172.28 nm | f=0.0000 | <S**2>=0.000 |  |
| 914 | 118 ->145         | -0.12226  |           |           |          |              |  |
| 915 | 137 ->147         | -0.48892  |           |           |          |              |  |
| 916 | 139 ->145         | -0.11810  |           |           |          |              |  |
| 917 | 143 ->147         | 0.32931   |           |           |          |              |  |
| 918 | 144 ->158         | -0.19148  |           |           |          |              |  |
| 919 | 144 ->159         | -0.10344  |           |           |          |              |  |
| 920 | Excited State 27: | Singlet-A | 7.2334 eV | 171.41 nm | f=0.0000 | <S**2>=0.000 |  |
| 921 | 110 ->146         | -0.10281  |           |           |          |              |  |
| 922 | 111 ->145         | -0.20097  |           |           |          |              |  |
| 923 | 114 ->146         | -0.13037  |           |           |          |              |  |
| 924 | 115 ->145         | -0.16591  |           |           |          |              |  |
| 925 | 117 ->146         | -0.17092  |           |           |          |              |  |
| 926 | 118 ->145         | 0.35564   |           |           |          |              |  |
| 927 | 133 ->146         | -0.26648  |           |           |          |              |  |
| 928 | 133 ->155         | -0.10352  |           |           |          |              |  |
| 929 | 137 ->147         | -0.15400  |           |           |          |              |  |
| 930 | 139 ->145         | 0.26259   |           |           |          |              |  |
| 931 | 143 ->147         | 0.11741   |           |           |          |              |  |
| 932 | Excited State 28: | Singlet-A | 7.2689 eV | 170.57 nm | f=0.0132 | <S**2>=0.000 |  |
| 933 | 133 ->147         | -0.12287  |           |           |          |              |  |
| 934 | 137 ->146         | 0.62523   |           |           |          |              |  |
| 935 | 137 ->155         | 0.12744   |           |           |          |              |  |
| 936 | 143 ->146         | -0.11783  |           |           |          |              |  |
| 937 | 144 ->148         | -0.10865  |           |           |          |              |  |
| 938 | Excited State 29: | Singlet-A | 7.2892 eV | 170.09 nm | f=0.0107 | <S**2>=0.000 |  |
| 939 | 140 ->147         | -0.12446  |           |           |          |              |  |
| 940 | 143 ->151         | 0.18465   |           |           |          |              |  |
| 941 | 143 ->154         | -0.16801  |           |           |          |              |  |
| 942 | 143 ->156         | 0.14777   |           |           |          |              |  |
| 943 | 143 ->165         | 0.10297   |           |           |          |              |  |
| 944 | 144 ->150         | 0.20034   |           |           |          |              |  |
| 945 | 144 ->152         | 0.30387   |           |           |          |              |  |
| 946 | 144 ->153         | 0.28802   |           |           |          |              |  |
| 947 | 144 ->157         | -0.21871  |           |           |          |              |  |
| 948 | 144 ->166         | 0.15341   |           |           |          |              |  |
| 949 | Excited State 30: | Singlet-A | 7.3187 eV | 169.41 nm | f=0.0002 | <S**2>=0.000 |  |
| 950 | 143 ->152         | 0.18274   |           |           |          |              |  |

|     |           |          |
|-----|-----------|----------|
| 951 | 143 ->153 | 0.16843  |
| 952 | 143 ->157 | -0.14315 |
| 953 | 144 ->151 | 0.34681  |
| 954 | 144 ->154 | -0.29297 |
| 955 | 144 ->156 | 0.21631  |
| 956 | 144 ->163 | 0.14280  |
| 957 | 144 ->165 | 0.15538  |
| 958 | 144 ->169 | -0.18547 |

### 959 TD-DFT excitation energies and oscillator strengths for Th<sub>3</sub>(10):

|      |                                                                                   |           |           |           |          |              |
|------|-----------------------------------------------------------------------------------|-----------|-----------|-----------|----------|--------------|
| 960  | Excited State 1:                                                                  | Singlet-A | 3.2352 eV | 383.23 nm | f=1.1501 | <S**2>=0.000 |
| 961  | 143 ->146                                                                         | 0.10496   |           |           |          |              |
| 962  | 144 ->145                                                                         | 0.69331   |           |           |          |              |
| 963  | This state for optimization and/or second-order correction.                       |           |           |           |          |              |
| 964  | Total Energy, E(TD-HF/TD-DFT) = -2442.48397494                                    |           |           |           |          |              |
| 965  | Copying the excited state density for this state as the 1-particle RhoCI density. |           |           |           |          |              |
| 966  | Excited State 2:                                                                  | Singlet-A | 4.4727 eV | 277.20 nm | f=0.0114 | <S**2>=0.000 |
| 967  | 140 ->145                                                                         | -0.13771  |           |           |          |              |
| 968  | 143 ->145                                                                         | 0.41305   |           |           |          |              |
| 969  | 144 ->146                                                                         | 0.53540   |           |           |          |              |
| 970  | Excited State 3:                                                                  | Singlet-A | 4.9600 eV | 249.97 nm | f=0.0009 | <S**2>=0.000 |
| 971  | 139 ->146                                                                         | -0.12084  |           |           |          |              |
| 972  | 140 ->145                                                                         | 0.12421   |           |           |          |              |
| 973  | 142 ->145                                                                         | 0.24007   |           |           |          |              |
| 974  | 143 ->145                                                                         | 0.52412   |           |           |          |              |
| 975  | 144 ->146                                                                         | -0.33903  |           |           |          |              |
| 976  | Excited State 4:                                                                  | Singlet-A | 5.0025 eV | 247.84 nm | f=0.0001 | <S**2>=0.000 |
| 977  | 140 ->145                                                                         | 0.18829   |           |           |          |              |
| 978  | 141 ->146                                                                         | -0.15922  |           |           |          |              |
| 979  | 142 ->145                                                                         | 0.57887   |           |           |          |              |
| 980  | 143 ->145                                                                         | -0.17322  |           |           |          |              |
| 981  | 144 ->146                                                                         | 0.24500   |           |           |          |              |
| 982  | Excited State 5:                                                                  | Singlet-A | 5.1535 eV | 240.58 nm | f=0.0025 | <S**2>=0.000 |
| 983  | 140 ->146                                                                         | 0.11974   |           |           |          |              |
| 984  | 141 ->145                                                                         | 0.61946   |           |           |          |              |
| 985  | 142 ->146                                                                         | -0.24148  |           |           |          |              |
| 986  | 144 ->149                                                                         | 0.12542   |           |           |          |              |
| 987  | Excited State 6:                                                                  | Singlet-A | 5.2003 eV | 238.42 nm | f=0.0002 | <S**2>=0.000 |
| 988  | 139 ->148                                                                         | 0.11993   |           |           |          |              |
| 989  | 144 ->148                                                                         | 0.65392   |           |           |          |              |
| 990  | 144 ->150                                                                         | 0.20644   |           |           |          |              |
| 991  | Excited State 7:                                                                  | Singlet-A | 5.2659 eV | 235.45 nm | f=0.2023 | <S**2>=0.000 |
| 992  | 140 ->145                                                                         | 0.59885   |           |           |          |              |
| 993  | 141 ->146                                                                         | 0.21978   |           |           |          |              |
| 994  | 142 ->145                                                                         | -0.17621  |           |           |          |              |
| 995  | 143 ->149                                                                         | 0.10311   |           |           |          |              |
| 996  | 144 ->146                                                                         | 0.11921   |           |           |          |              |
| 997  | 144 ->157                                                                         | -0.12382  |           |           |          |              |
| 998  | Excited State 8:                                                                  | Singlet-A | 5.3190 eV | 233.10 nm | f=0.0000 | <S**2>=0.000 |
| 999  | 143 ->150                                                                         | -0.22838  |           |           |          |              |
| 1000 | 144 ->147                                                                         | 0.63700   |           |           |          |              |
| 1001 | Excited State 9:                                                                  | Singlet-A | 5.4861 eV | 226.00 nm | f=0.0009 | <S**2>=0.000 |

|      |                   |           |           |           |          |              |  |
|------|-------------------|-----------|-----------|-----------|----------|--------------|--|
| 1002 | 143 ->147         | -0.30436  |           |           |          |              |  |
| 1003 | 144 ->148         | -0.19118  |           |           |          |              |  |
| 1004 | 144 ->150         | 0.56937   |           |           |          |              |  |
| 1005 | Excited State 10: | Singlet-A | 5.7371 eV | 216.11 nm | f=0.0898 | <S**2>=0.000 |  |
| 1006 | 139 ->145         | -0.19445  |           |           |          |              |  |
| 1007 | 141 ->145         | -0.14198  |           |           |          |              |  |
| 1008 | 143 ->146         | 0.38087   |           |           |          |              |  |
| 1009 | 144 ->149         | 0.51601   |           |           |          |              |  |
| 1010 | Excited State 11: | Singlet-A | 6.0924 eV | 203.51 nm | f=0.0080 | <S**2>=0.000 |  |
| 1011 | 139 ->145         | 0.51640   |           |           |          |              |  |
| 1012 | 140 ->146         | 0.11207   |           |           |          |              |  |
| 1013 | 143 ->146         | -0.24081  |           |           |          |              |  |
| 1014 | 143 ->157         | -0.10360  |           |           |          |              |  |
| 1015 | 144 ->149         | 0.35163   |           |           |          |              |  |
| 1016 | Excited State 12: | Singlet-A | 6.2170 eV | 199.43 nm | f=0.0000 | <S**2>=0.000 |  |
| 1017 | 140 ->148         | 0.43473   |           |           |          |              |  |
| 1018 | 140 ->150         | 0.17204   |           |           |          |              |  |
| 1019 | 142 ->148         | 0.35622   |           |           |          |              |  |
| 1020 | 143 ->148         | -0.32545  |           |           |          |              |  |
| 1021 | Excited State 13: | Singlet-A | 6.2258 eV | 199.15 nm | f=0.0001 | <S**2>=0.000 |  |
| 1022 | 140 ->147         | -0.21337  |           |           |          |              |  |
| 1023 | 141 ->148         | -0.15016  |           |           |          |              |  |
| 1024 | 141 ->150         | 0.42272   |           |           |          |              |  |
| 1025 | 142 ->147         | 0.41946   |           |           |          |              |  |
| 1026 | 143 ->147         | -0.14830  |           |           |          |              |  |
| 1027 | Excited State 14: | Singlet-A | 6.2301 eV | 199.01 nm | f=0.0000 | <S**2>=0.000 |  |
| 1028 | 140 ->148         | 0.16562   |           |           |          |              |  |
| 1029 | 140 ->150         | -0.16123  |           |           |          |              |  |
| 1030 | 141 ->147         | 0.47248   |           |           |          |              |  |
| 1031 | 142 ->150         | 0.38420   |           |           |          |              |  |
| 1032 | 143 ->150         | -0.12741  |           |           |          |              |  |
| 1033 | Excited State 15: | Singlet-A | 6.3848 eV | 194.19 nm | f=0.0000 | <S**2>=0.000 |  |
| 1034 | 139 ->147         | 0.10077   |           |           |          |              |  |
| 1035 | 143 ->150         | 0.20691   |           |           |          |              |  |
| 1036 | 144 ->158         | 0.12446   |           |           |          |              |  |
| 1037 | 144 ->160         | -0.29750  |           |           |          |              |  |
| 1038 | 144 ->162         | 0.52143   |           |           |          |              |  |
| 1039 | 144 ->166         | -0.10013  |           |           |          |              |  |
| 1040 | 144 ->173         | -0.10046  |           |           |          |              |  |
| 1041 | Excited State 16: | Singlet-A | 6.5583 eV | 189.05 nm | f=0.0785 | <S**2>=0.000 |  |
| 1042 | 139 ->145         | -0.21790  |           |           |          |              |  |
| 1043 | 140 ->146         | 0.22034   |           |           |          |              |  |
| 1044 | 141 ->145         | 0.17733   |           |           |          |              |  |
| 1045 | 141 ->149         | -0.15636  |           |           |          |              |  |
| 1046 | 142 ->146         | 0.47097   |           |           |          |              |  |
| 1047 | 143 ->146         | -0.28815  |           |           |          |              |  |
| 1048 | 144 ->149         | 0.13947   |           |           |          |              |  |
| 1049 | Excited State 17: | Singlet-A | 6.5981 eV | 187.91 nm | f=0.0572 | <S**2>=0.000 |  |
| 1050 | 140 ->145         | 0.22905   |           |           |          |              |  |
| 1051 | 141 ->146         | -0.35047  |           |           |          |              |  |
| 1052 | 142 ->145         | -0.20032  |           |           |          |              |  |
| 1053 | 142 ->149         | 0.18471   |           |           |          |              |  |

|      |                   |           |           |           |          |              |  |
|------|-------------------|-----------|-----------|-----------|----------|--------------|--|
| 1054 | 143 ->149         | -0.25489  |           |           |          |              |  |
| 1055 | 144 ->157         | 0.35732   |           |           |          |              |  |
| 1056 | 144 ->163         | 0.12281   |           |           |          |              |  |
| 1057 | Excited State 18: | Singlet-A | 6.7410 eV | 183.93 nm | f=0.0047 | <S**2>=0.000 |  |
| 1058 | 121 ->146         | -0.15110  |           |           |          |              |  |
| 1059 | 124 ->145         | -0.43713  |           |           |          |              |  |
| 1060 | 126 ->145         | 0.48565   |           |           |          |              |  |
| 1061 | Excited State 19: | Singlet-A | 6.7490 eV | 183.71 nm | f=0.0404 | <S**2>=0.000 |  |
| 1062 | 139 ->145         | 0.32421   |           |           |          |              |  |
| 1063 | 140 ->146         | 0.17189   |           |           |          |              |  |
| 1064 | 142 ->146         | 0.32710   |           |           |          |              |  |
| 1065 | 143 ->146         | 0.41507   |           |           |          |              |  |
| 1066 | 144 ->145         | -0.11702  |           |           |          |              |  |
| 1067 | 144 ->149         | -0.18198  |           |           |          |              |  |
| 1068 | Excited State 20: | Singlet-A | 6.7642 eV | 183.29 nm | f=0.0000 | <S**2>=0.000 |  |
| 1069 | 140 ->148         | 0.10227   |           |           |          |              |  |
| 1070 | 143 ->148         | 0.12138   |           |           |          |              |  |
| 1071 | 143 ->168         | -0.10086  |           |           |          |              |  |
| 1072 | 144 ->151         | 0.14359   |           |           |          |              |  |
| 1073 | 144 ->153         | -0.14284  |           |           |          |              |  |
| 1074 | 144 ->156         | 0.16845   |           |           |          |              |  |
| 1075 | 144 ->160         | 0.50528   |           |           |          |              |  |
| 1076 | 144 ->162         | 0.26350   |           |           |          |              |  |
| 1077 | Excited State 21: | Singlet-A | 6.8325 eV | 181.46 nm | f=0.0029 | <S**2>=0.000 |  |
| 1078 | 139 ->145         | -0.12983  |           |           |          |              |  |
| 1079 | 140 ->146         | 0.55172   |           |           |          |              |  |
| 1080 | 141 ->145         | -0.19479  |           |           |          |              |  |
| 1081 | 141 ->149         | 0.24496   |           |           |          |              |  |
| 1082 | 142 ->146         | -0.10988  |           |           |          |              |  |
| 1083 | 144 ->169         | 0.10752   |           |           |          |              |  |
| 1084 | 144 ->172         | 0.12705   |           |           |          |              |  |
| 1085 | Excited State 22: | Singlet-A | 6.8371 eV | 181.34 nm | f=0.0005 | <S**2>=0.000 |  |
| 1086 | 143 ->151         | 0.15153   |           |           |          |              |  |
| 1087 | 143 ->153         | -0.14615  |           |           |          |              |  |
| 1088 | 143 ->156         | 0.12087   |           |           |          |              |  |
| 1089 | 144 ->150         | -0.12148  |           |           |          |              |  |
| 1090 | 144 ->152         | 0.39264   |           |           |          |              |  |
| 1091 | 144 ->154         | -0.35542  |           |           |          |              |  |
| 1092 | 144 ->155         | 0.26005   |           |           |          |              |  |
| 1093 | 144 ->164         | 0.14586   |           |           |          |              |  |
| 1094 | Excited State 23: | Singlet-A | 6.8658 eV | 180.58 nm | f=0.0000 | <S**2>=0.000 |  |
| 1095 | 143 ->152         | 0.13304   |           |           |          |              |  |
| 1096 | 143 ->154         | -0.13296  |           |           |          |              |  |
| 1097 | 143 ->155         | 0.10352   |           |           |          |              |  |
| 1098 | 144 ->151         | 0.37744   |           |           |          |              |  |
| 1099 | 144 ->153         | -0.31825  |           |           |          |              |  |
| 1100 | 144 ->156         | 0.19876   |           |           |          |              |  |
| 1101 | 144 ->160         | -0.23391  |           |           |          |              |  |
| 1102 | 144 ->166         | 0.17936   |           |           |          |              |  |
| 1103 | 144 ->175         | 0.12662   |           |           |          |              |  |
| 1104 | Excited State 24: | Singlet-A | 6.9527 eV | 178.33 nm | f=0.5434 | <S**2>=0.000 |  |
| 1105 | 140 ->149         | 0.13155   |           |           |          |              |  |



|      |                   |           |           |           |          |              |  |
|------|-------------------|-----------|-----------|-----------|----------|--------------|--|
| 1106 | 141 ->146         | 0.40916   |           |           |          |              |  |
| 1107 | 142 ->145         | 0.13324   |           |           |          |              |  |
| 1108 | 142 ->149         | -0.18033  |           |           |          |              |  |
| 1109 | 143 ->149         | -0.18570  |           |           |          |              |  |
| 1110 | 144 ->157         | 0.40079   |           |           |          |              |  |
| 1111 | 144 ->163         | 0.11667   |           |           |          |              |  |
| 1112 | 144 ->170         | -0.13318  |           |           |          |              |  |
| 1113 | 144 ->171         | 0.11015   |           |           |          |              |  |
| 1114 | Excited State 25: | Singlet-A | 6.9796 eV | 177.64 nm | f=0.0000 | <S**2>=0.000 |  |
| 1115 | 121 ->145         | 0.51090   |           |           |          |              |  |
| 1116 | 125 ->145         | 0.32714   |           |           |          |              |  |
| 1117 | 126 ->146         | -0.25877  |           |           |          |              |  |
| 1118 | Excited State 26: | Singlet-A | 7.0175 eV | 176.68 nm | f=0.0009 | <S**2>=0.000 |  |
| 1119 | 139 ->148         | 0.10075   |           |           |          |              |  |
| 1120 | 143 ->147         | -0.17571  |           |           |          |              |  |
| 1121 | 143 ->158         | -0.12106  |           |           |          |              |  |
| 1122 | 143 ->162         | -0.22564  |           |           |          |              |  |
| 1123 | 144 ->150         | -0.13309  |           |           |          |              |  |
| 1124 | 144 ->159         | -0.10324  |           |           |          |              |  |
| 1125 | 144 ->164         | -0.28123  |           |           |          |              |  |
| 1126 | 144 ->168         | 0.44776   |           |           |          |              |  |
| 1127 | Excited State 27: | Singlet-A | 7.1144 eV | 174.27 nm | f=0.0000 | <S**2>=0.000 |  |
| 1128 | 140 ->148         | 0.24262   |           |           |          |              |  |
| 1129 | 142 ->148         | 0.10358   |           |           |          |              |  |
| 1130 | 143 ->148         | 0.45693   |           |           |          |              |  |
| 1131 | 143 ->150         | 0.21545   |           |           |          |              |  |
| 1132 | 144 ->162         | -0.23352  |           |           |          |              |  |
| 1133 | 144 ->165         | 0.16471   |           |           |          |              |  |
| 1134 | 144 ->173         | -0.14445  |           |           |          |              |  |
| 1135 | Excited State 28: | Singlet-A | 7.1596 eV | 173.17 nm | f=0.0020 | <S**2>=0.000 |  |
| 1136 | 114 ->145         | -0.17717  |           |           |          |              |  |
| 1137 | 118 ->145         | -0.28277  |           |           |          |              |  |
| 1138 | 119 ->145         | 0.10392   |           |           |          |              |  |
| 1139 | 121 ->146         | 0.11144   |           |           |          |              |  |
| 1140 | 124 ->145         | -0.26405  |           |           |          |              |  |
| 1141 | 125 ->146         | 0.23664   |           |           |          |              |  |
| 1142 | 126 ->145         | -0.26854  |           |           |          |              |  |
| 1143 | 126 ->149         | -0.11796  |           |           |          |              |  |
| 1144 | 137 ->145         | 0.28692   |           |           |          |              |  |
| 1145 | 138 ->146         | -0.12358  |           |           |          |              |  |
| 1146 | Excited State 29: | Singlet-A | 7.2077 eV | 172.02 nm | f=0.0083 | <S**2>=0.000 |  |
| 1147 | 139 ->146         | -0.13113  |           |           |          |              |  |
| 1148 | 141 ->146         | 0.12497   |           |           |          |              |  |
| 1149 | 143 ->169         | -0.11253  |           |           |          |              |  |
| 1150 | 143 ->172         | -0.13142  |           |           |          |              |  |
| 1151 | 144 ->157         | 0.16827   |           |           |          |              |  |
| 1152 | 144 ->170         | 0.57395   |           |           |          |              |  |
| 1153 | 144 ->171         | -0.19441  |           |           |          |              |  |
| 1154 | Excited State 30: | Singlet-A | 7.2624 eV | 170.72 nm | f=0.0000 | <S**2>=0.000 |  |
| 1155 | 112 ->145         | 0.25008   |           |           |          |              |  |
| 1156 | 116 ->145         | 0.13405   |           |           |          |              |  |
| 1157 | 120 ->145         | -0.10514  |           |           |          |              |  |

|      |           |          |
|------|-----------|----------|
| 1158 | 121 ->145 | 0.23442  |
| 1159 | 124 ->146 | 0.14355  |
| 1160 | 125 ->145 | -0.25429 |
| 1161 | 137 ->146 | -0.13388 |
| 1162 | 138 ->145 | 0.35980  |
| 1163 | 143 ->148 | -0.12958 |

## 1164 References

1. Lavigueur, C.; Foster, E.J.; Williams, V.E. A simple and inexpensive capillary furnace for variable-temperature X-ray diffraction. *J. Appl. Crystallogr.* **2008**, *41*, 214–216.
2. Boucher, N.; Leroy, J.; Sergeev, S.; Pouzet, E.; Lemaure, V.; Lazzaroni, R.; Cornil, J.; Geerts, Y.H.; Sferrazza, M. Mesomorphism of dialkylterthiophene homologues. *Synth. Met.* **2009**, *159*, 1319–1324.
3. Bruker, APEX3, SAINT and SADABS, Bruker AXS Inc., Madison, Wisconsin, USA, 2016.
4. G. M. Sheldrick, TWINABS (Version 2012/1), University of Göttingen, Germany, 1996.
5. Sheldrick, G.M. Crystal structure refinement with SHELXL. *Acta Crystallogr. Sect. C Struct. Chem.* **2015**, *71*, 3–8.
6. Hübschle, C.B.; Sheldrick, G.M.; Dittrich, B. ShelXle: a Qt graphical user interface for SHELXL. *J. Appl. Crystallogr.* **2011**, *44*, 1281–1284.
7. Farrugia, L.J. WinGX and ORTEP for Windows: an update. *J. Appl. Crystallogr.* **2012**, *45*, 849–854.
8. Fenn, T.D.; Ringe, D.; Petsko, G.A. POVScript+: a program for model and data visualization using persistence of vision ray-tracing. *J. Appl. Crystallogr.* **2003**, *36*, 944–947.
9. Lercher, C.; Röthel, C.; Roscioni, O.M.; Geerts, Y.H.; Shen, Q.; Teichert, C.; Fischer, R.; Leising, G.; Sferrazza, M.; Gbabode, G.; et al. Polymorphism of dioctyl-terthiophene within thin films: The role of the first monolayer. *Chem. Phys. Lett.* **2015**, *630*, 12–17.
10. Van Bolhuis, F.; Wynberg, H.; Havinga, E.E.; Meijer, E.W.; Staring, E.G.J. The X-ray structure and MNDO calculations of  $\alpha$ -terthienyl: A model for polythiophenes. *Synth. Met.* **1989**, *30*, 381–389.
11. Resch-Genger, U.; Rurack, K. Determination of the photoluminescence quantum yield of dilute dye solutions (IUPAC Technical Report). *Pure Appl. Chem.* **2013**, *85*, 2005–2013.
12. Brouwer, A.M. Standards for photoluminescence quantum yield measurements in solution (IUPAC Technical Report). *Pure Appl. Chem.* **2011**, *83*, 2213–2228.
13. Stephens, P.J.; Devlin, F.J.; Chabalowski, C.F.; Frisch, M.J. Ab Initio Calculation of Vibrational Absorption and Circular Dichroism Spectra Using Density Functional Force Fields. *J. Phys. Chem.* **1994**, *98*, 11623–11627.
14. Becke, A.D. Density-functional thermochemistry. III. The role of exact exchange. *J. Chem. Phys.* **1993**, *98*, 5648–5652.
15. Tomasi, J.; Mennucci, B.; Cancès, E. The IEF version of the PCM solvation method: an overview of a new method addressed to study molecular solutes at the QM ab initio level. *J. Mol. Struct. THEOCHEM* **1999**, *464*, 211–226.
16. Barone, V.; Cossi, M.; Tomasi, J. Geometry optimization of molecular structures in solution by the polarizable continuum model. *J. Comput. Chem.* **1998**, *19*, 404–417.
17. Barone, V.; Cossi, M.; Tomasi, J. A new definition of cavities for the computation of solvation free energies by the polarizable continuum model. *J. Chem. Phys.* **1997**, *107*, 3210–3221.
18. Miertuš, S.; Scrocco, E.; Tomasi, J. Electrostatic interaction of a solute with a continuum. A direct utilization of AB initio molecular potentials for the prevision of solvent effects. *Chem. Phys.* **1981**, *55*, 117–129.
19. Gaussian 16, Revision B.01, M. J. Frisch, G. W. Trucks, H. B. Schlegel, G. E. Scuseria, M. A. Robb, J. R. Cheeseman, G. Scalmani, V. Barone, G. A. Petersson, H. Nakatsuji, X. Li, M. Caricato, A. V. Marenich, J. Bloino, B. G. Janesko, R. Gomperts, B. Mennucci, H. P. Hratchian, J. V. Ortiz, A. F. Izmaylov, J. L. Sonnenberg, D. Williams-Young, F. Ding, F. Lipparini, F. Egidi, J. Goings, B. Peng, A. Petrone, T. Henderson, D. Ranasinghe, V. G. Zakrzewski, J. Gao, N. Rega, G. Zheng, W. Liang, M. Hada, M. Ehara, K. Toyota, R. Fukuda, J. Hasegawa, M. Ishida, T. Nakajima, Y. Honda, O. Kitao, H. Nakai, T. Vreven, K. Throssell, J. A. Montgomery, Jr., J. E. Peralta, F. Ogliaro, M. J. Bearpark, J. J. Heyd, E. N. Brothers, K. N. Kudin, V. N. Staroverov, T. A. Keith, R. Kobayashi, J. Normand, K. Raghavachari, A. P. Rendell, J. C. Burant, S. S. Iyengar, J. Tomasi, M. Cossi, J. M. Millam, M. Klene, C. Adamo, R. Cammi, J. W. Ochterski, R. L. Martin, K. Morokuma, O. Farkas, J. B. Foresman, and D. J. Fox, Gaussian, Inc., Wallingford CT, 2016.

- 1210 20. Schäfer, A.; Huber, C.; Ahlrichs, R. Fully optimized contracted Gaussian basis sets of triple zeta valence  
1211 quality for atoms Li to Kr. *J. Chem. Phys.* **1994**, *100*, 5829–5835.
- 1212 21. Schäfer, A.; Horn, H.; Ahlrichs, R. Fully optimized contracted Gaussian basis sets for atoms Li to Kr. *J.*  
1213 *Chem. Phys.* **1992**, *97*, 2571–2577.
- 1214 22. Stratmann, R.E.; Scuseria, G.E.; Frisch, M.J. An efficient implementation of time-dependent density-  
1215 functional theory for the calculation of excitation energies of large molecules. *J. Chem. Phys.* **1998**, *109*, 8218–  
1216 8224.
- 1217 23. Casida, M.E. Time-Dependent Density Functional Response Theory for Molecules. In *Recent Advances in*  
1218 *Density Functional Methods; Recent Advances in Computational Chemistry; WORLD SCIENTIFIC, 1995;*  
1219 *Vol. Volume 1*, pp. 155–192 ISBN 978-981-02-2442-4.
- 1220 24. Huff, G.S.; Gallaher, J.K.; Hodgkiss, J.M.; Gordon, K.C. No single DFT method can predict Raman cross-  
1221 sections, frequencies and electronic absorption maxima of oligothiophenes. *Synth. Met.* **2017**, *231*, 1–6.
- 1222 25. Jacquemin, D.; Michaux, C.; Perpète, E.A.; Maurel, F.; Perrier, A. Photochromic molecular wires: Insights  
1223 from theory. *Chem. Phys. Lett.* **2010**, *488*, 193–197.
- 1224 26. Yanai, T.; Tew, D.P.; Handy, N.C. A new hybrid exchange–correlation functional using the Coulomb-  
1225 attenuating method (CAM-B3LYP). *Chem. Phys. Lett.* **2004**, *393*, 51–57.
